# Supplementary material for: Integrated omics analysis reveals the immunologic characteristics of cystic Peyer’s patches in the cecum of Bactrian camels
Source: PeerJ. 2023 Jan 9;11:e14647. doi: 10.7717/peerj.14647 (PMC9835693; doi:10.7717/peerj.14647)
Supplement: Data S1 [file peerj-11-14647-s011.xlsx]

## Sheet: Raw data for metabolism
index	MS2_name	RT	m/z	PPS-1	PPS-2	PPS-3	NPPS-1	NPPS-2	NPPS-3	QC-1	QC-2	QC-3	Class	CAS	HMDB	C_ID	Pathway	KEGG_B_class	KEGG_A_class
M441T33_NEG	.alpha.-apooxytetracycline	32.7475	441.12	11464	13598.7	11737.1	197916	202345	144745	121486	121563	116495	--	--	--	-	-	-	-
M261T452_NEG	.alpha.-L-Glu-L-Asp	452.229	261.071	55830.6	1708.68	2016.42	2679.81	1731.24	4320.77	8735.77	8213.25	8202.37	Peptidomimetics	3918-84-1	HMDB0028815	-	-	-	-
M816T218_NEG	.alpha.-muricholic acid	217.751	815.564	1989.64	2810.98	6196.24	2009.49	3092.27	690.472	2151.91	1946.34	1949.38	Steroids and steroid derivatives	39016-49-4	HMDB0000865	-	-	-	-
M421T397_1_NEG	.alpha.,.alpha.'-trehalose 6-phosphate	397.162	421.062	1401.31	2617.62	2339.74	873.207	1435.76	3302.48	3089.65	3135.29	3135.46	Organooxygen compounds	4484-88-2	HMDB0001124	C00689	ko01100//Metabolic pathways;ko04723//Retrograde endocannabinoid signaling;ko00500//Starch and sucrose metabolism	Carbohydrate metabolism;Global and overview maps;Nervous system	Metabolism;Organismal Systems
M359T320_NEG	.beta.-d-allose	319.661	359.096	1239.94	3292.29	7424.11	20059.2	12801.8	18954.6	11340.2	11659.3	10845.2	Organooxygen compounds	6038-51-3	HMDB0001151	C01487	ko01120//Microbial metabolism in diverse environments;ko02010//ABC transporters;ko00051//Fructose and mannose metabolism	Carbohydrate metabolism;Global and overview maps;Membrane transport	Environmental Information Processing;Metabolism
M527T297_NEG	.beta.-estradiol-3-glucuronide-17-sulfate	297.335	527.139	1096.08	1934.48	3798.05	18608.7	25199.2	12730.9	7134.46	6696.92	7124.64	--	--	--	-	-	-	-
M687T34_1_NEG	(.+/-.)-11-nor-.delta.9-tetrahydrocannabinol-9-carboxylic acid	33.794	687.377	4633.31	10672.2	46209.3	55254.4	42655.6	35035.4	30833.1	29890.7	29889.1	--	--	--	-	-	-	-
M231T95_NEG	(.+/-.)-camphor-10-sulfonic acid	94.8745	231.064	7374.15	13369.3	12516.6	15867.5	22253.7	24460.2	22285.9	22355.9	22313.8	--	--	--	-	-	-	-
M503T25_2_NEG	(19r)-9-acetyl-19-hydroxy-10,14-dimethyl-20-oxopentacyclo[11.8.0.0&lt;2,10&gt;.0&lt;4,9 &gt;.0&lt;14,19&gt;]henicos-17-yl acetate	24.6865	503.318	40943.1	116815	173617	139628	127902	112572	118000	107672	117832	--	--	--	-	-	-	-
M659T169_NEG	(1s,3r,4s,5r)-4-[(4-carboxy-3-hydroxy-3-methylbutanoyl)oxy]-3,5-bis({[(2e)-3-(3,4-dihydroxyphenyl)prop-2-enoyl]oxy})-1-hydroxycyclohexane-1-carboxylic acid	168.723	659.164	457.861	8661.5	8102.63	46139.6	23278.5	53593.6	18504.6	17862.5	17852.9	--	--	--	-	-	-	-
M734T143_NEG	(2-{[3-hydroxy-2-tetradecanamidooctadec-4-en-1-yl phosphonato]oxy}ethyl)trimethylazanium	142.993	733.544	91813.9	26341.2	33692.4	22157.3	11416.3	29028.8	13923.7	17729.5	17908.1	--	--	--	-	-	-	-
M351T167_NEG	(2-acetyloxy-3,6-diphenylcyclohexyl) acetate	167.287	351.18	2931.28	18360.2	30854.2	19218.4	20035.9	22001.3	24365.9	22962.1	22980.2	--	--	--	-	-	-	-
M672T140_NEG	(2-aminoethoxy)[3-[hexadec-1-en-1-yloxy]-2-[hexadec-9-enoyloxy]propoxy]phosphinic acid	139.754	672.494	45353.6	9024.94	19210.2	82876	68934.5	85309.9	15956	15578	15960.3	--	--	--	-	-	-	-
M723T38_NEG	(2-aminoethoxy)[3-[hexadec-1-en-1-yloxy]-2-[icosa-5.8.11.14-tetraenoyloxy]propoxy]phosphinic acid	37.682	722.511	996864	64518.4	80740	221032	265544	341540	152206	149118	152150	--	--	--	-	-	-	-
M679T252_NEG	(2r,3r,4r,6ar,6bs,8as,11r,12r,12as,14br)-2,3,12-trihydroxy-4,6a,6b,11,12,14b-hexamethyl-8a-[(2s,3r,4s,5s,6r)-3,4,5-trihydroxy-6-(hydroxymethyl)oxan-2-yl]oxycarbonyl-1,2,3,4a,5,6,7,8,9,10,11,12a,14,14a-tetradecahydropicene-4-carboxylic acid	251.879	679.356	176.337	32884.4	29293.4	393.649	286.51	418.297	6681.65	6678.75	6985.89	--	--	--	-	-	-	-
M593T241_NEG	(2r,3s,4s,5r,6r)-6-[1,7-bis(4-hydroxyphenyl)heptan-3-yloxy]-5-[(2s,3r,4r)-3,4-dihydroxy-4-(hydroxymethyl)oxolan-2-yl]oxy-2-(hydroxymethyl)oxane-3,4-diol	241.486	593.27	3649.74	2206.18	10861.6	4752.9	6031.22	3895.97	4603.06	4599.26	4946.5	--	--	--	-	-	-	-
M485T383_NEG	(2s,3r,4as,12br)-2,3,4a,8-tetrahydroxy-12b-(5-hydroxy-6-methyloxan-2-yl)oxy-3-methyl-2,4-dihydrobenzo[a]anthracene-1,7,12-trione	383.036	485.13	4377.73	2390.22	3945.96	3408.02	11182.4	11990.4	24388.7	28070	28052.1	--	--	--	-	-	-	-
M461T275_NEG	(2s,3s,4s,5r,6s)-6-[2-(3,4-dihydroxyphenyl)-5-hydroxy-4-oxochromen-7-yl]oxy-3,4,5-trihydroxyoxane-2-carboxylic acid	274.776	461.07	568.337	1127	2229.52	3544.91	1668.22	2298.98	1816	1863.36	1863.51	--	--	--	-	-	-	-
M287T337_2_NEG	(3,6,9-trimethylidene-2-oxo-3a,4,5,6a,7,8,9a,9b-octahydroazuleno[4,5-b]furan-8-yl) acetate	336.926	287.148	1939.68	3827.03	4629.78	5707.37	6857.37	5712.35	6884.18	6898.17	5957.61	--	--	--	-	-	-	-
M277T265_NEG	(3e)-3-benzylidene-4-methyl-1h-1,4-benzodiazepine-2,5-dione	265.094	277.119	21755.1	1908.9	4085.53	18456.3	15633.7	23704.6	1763.67	1597.98	1631.25	--	--	--	-	-	-	-
M503T170_NEG	(4as,6as,6br,8r,9r,10r,11r,12ar,14bs)-8,10,11-trihydroxy-9-(hydroxymethyl)-2,2,6a,6b,9,12a-hexamethyl-1,3,4,5,6,6a,7,8,8a,10,11,12,13,14b-tetradecahydropicene-4a-carboxylic acid	169.504	503.323	10942.6	34062.6	41475.4	41890.6	61523.4	46860.7	21411.7	29343.5	21687.9	--	--	--	-	-	-	-
M497T174_NEG	(5r)-5-[(1s,2s,3r,4r)-3-[(4e)-hex-4-enoyl]-6-[(2e,4e)-hexa-2,4-dienoyl]-5,7-dihydroxy-4,7-dimethyl-8-oxobicyclo[2.2.2]oct-5-en-2-yl]-4-hydroxy-3,5-dimethyl-2,5-dihydrofuran-2-one	174.177	497.204	5690.8	17515.5	13725.2	6363.61	18666.7	28002.4	17686.5	16318	17682	--	--	--	-	-	-	-
M251T85_NEG	(8ar,12s,12ar)-12-hydroxy-4-methyl-4,5,6,7,8,8a,12,12a-octahydro-1h-3-benzoxecine-2,9-dione	85.0905	251.128	10176.8	33785.4	45454.7	49579.1	57139	38066.4	40716.5	36298	38562.4	--	--	--	-	-	-	-
M460T459_NEG	(desmethyl)hydroxycerivastatin	459.224	460.202	6302.76	178.253	224.341	983.953	1117.41	1559.32	3728.2	3721.69	3625.65	--	--	--	-	-	-	-
M829T160_NEG	(e)-n-[2-[3-acetamido-4,5-dihydroxy-6-(hydroxymethyl)oxan-2-yl]oxy-6-[2-[5-(2,4-dioxopyrimidin-1-yl)-3,4-dihydroxyoxolan-2-yl]-2-hydroxyethyl]-4,5-dihydroxyoxan-3-yl]-13-methyltetradec-2-enamide	160.477	829.402	1420.41	420012	7430.06	3810.99	3765.78	4540.58	31641.6	30803.2	31625.4	--	--	--	-	-	-	-
M328T55_NEG	(e)-n-[2-hydroxy-2-(4-hydroxyphenyl)ethyl]-3-(4-hydroxy-3-methoxyphenyl)prop-2-enamide	55.138	328.118	8597.93	10858.9	15826	423700	139795	274156	283981	266346	265886	--	--	--	-	-	-	-
M181T69_NEG	(n-(-2-acetamido))-2-aminoethanesulfonic acid	69.166	181.017	38672.7	88404.7	104257	142990	118237	147519	146165	144391	144352	--	--	--	-	-	-	-
M176T167_NEG	(s)-5-(4-hydroxyphenyl)-5-ethylhydantoin	167.354	176.057	880.967	52402	50360	1349.82	713.439	1537.78	10563.7	10260.7	10259.7	--	--	--	-	-	-	-
M329T201_NEG	(z)-9,12,13-trihydroxyoctadec-15-enoic acid	200.52	329.232	3399.08	10868.4	14230.8	14105.3	13073	14272.4	14017.2	13891.7	13889.4	--	--	--	-	-	-	-
M587T400_NEG	[(2r,3s,4s,5r,6s)-6-[3,5-dihydroxy-4-[3-(4-hydroxyphenyl)propanoyl]phenoxy]-3,4,5-trihydroxyoxan-2-yl]methyl 3,4,5-trihydroxybenzoate	399.695	587.121	596.045	480.036	439.105	2097.96	1312.25	2189.69	1509.04	1477.28	1684.78	--	--	--	-	-	-	-
M519T78_NEG	[2-(3,4-dihydroxyphenyl)-5-hydroxy-7-methoxy-4-oxo-3-[(2s,3r,4r,5r,6s)-3,4,5-trihydroxy-6-methyloxan-2-yl]oxychromen-8-yl] acetate	77.549	519.115	2282.33	7735.77	12352	123217	47044.3	110998	77783.8	60502.2	57919.3	--	--	--	-	-	-	-
M371T417_NEG	[3-(4-hydroxy-3-methoxybenzoyl)-2,3-dimethyloxiran-2-yl]-(4-hydroxy-3-methoxyphenyl)methanone	416.618	371.117	2172.06	2773.38	3565.68	3707.98	2745.3	3496.83	2851.9	2866.19	2688.5	--	--	--	-	-	-	-
M585T101_NEG	1-(1,2-dioctanoylphosphatidyl)inositol	101.294	585.251	2961.8	12293	9163.42	24385.2	19938.4	20629.6	10653.2	9930.43	10305.8	--	--	--	-	-	-	-
M775T35_NEG	1-(1z-octadecenyl)-2-(4z,7z,10z,13z,16z,19z-docosahexaenoyl)-sn-glycero-3-phosphoethanolamine	35.264	774.537	809897	24195.9	66535.8	169338	202919	207663	113728	111822	113688	Glycerophospholipids	-	HMDB0011394	-	-	-	-
M544T231_2_NEG	1-(5z,8z,11z,14z-eicosatetraenoyl)-sn-glycero-3-phosphoserine	230.98	544.264	28504.7	3868.63	12903	4688.28	7497.43	5823.37	16841.8	17832.9	17949.8	--	--	--	-	-	-	-
M476T190_NEG	1-(9z,12z-octadecadienoyl)-2-hydroxy-sn-glycero-3-phosphoethanolamine	189.563	476.276	198631	164835	443770	325833	611176	526465	505672	505661	502499	Glycerophospholipids	85046-18-0	HMDB0011507	-	-	-	-
M176T266_NEG	1-deoxy-1-(methylamino)-d-galactitol	265.851	176.092	26271.1	513.837	1500.2	5624.16	7528.43	8451.2	13064.8	13452.8	13067.2	--	--	--	-	-	-	-
M213T52_NEG	1-deoxy-d-xylulose 5-phosphate	52.113	213.007	22487.5	514154	217698	27310.1	28841.3	27555.7	79484.9	77790.4	77787.6	Organooxygen compounds	190079-18-6	HMDB0001213	C11437	ko01100//Metabolic pathways;ko01110//Biosynthesis of secondary metabolites;ko01130//Biosynthesis of antibiotics;ko00730//Thiamine metabolism;ko00900//Terpenoid backbone biosynthesis	Global and overview maps;Metabolism of cofactors and vitamins;Metabolism of terpenoids and polyketides	Metabolism
M836T173_1_NEG	1-hexadecanoyl-2-(9z-octadecenoyl)-sn-glycero-3-phospho-(1'-myo-inositol)	172.594	835.53	93040	5178.69	9476.66	24681.1	28202.9	23108	14849.7	14859.2	15304	Glycerophospholipids	-	HMDB0009783	-	-	-	-
M409T184_NEG	1-hexadecanoyl-2-sn-glycero-3-phosphate	184.162	409.233	8666.72	10747.8	16052.5	7303.7	15756.4	19770.1	9309.95	10637.8	9896.4	--	--	--	-	-	-	-
M703T168_NEG	1-hexadecyl-2-(9z-octadecenoyl)-sn-glycero-3-phosphoethanolamine	167.502	702.529	2574.45	33255.4	15192.2	17321.8	13226	12572.4	10298.4	9390.81	9363.95	--	--	--	-	-	-	-
M296T191_NEG	1-methylguanosine	190.962	296.099	13009.1	2679.59	3486.25	3129.13	5767.45	5322.7	8616.01	8731.52	8616.91	Purine nucleosides	2140-65-0	HMDB0001563	-	-	-	-
M363T85_NEG	1-methyluric acid	84.881	363.074	71370.3	60068.5	202927	3.69368e+06	1.98804e+06	1.2599e+06	1.96934e+06	2.02276e+06	1.96907e+06	Imidazopyrimidines	708-79-2	HMDB0003099	C16359	ko00232//Caffeine metabolism	Biosynthesis of other secondary metabolites	Metabolism
M741T139_NEG	1-myristoyl-2-palmitoyl-sn-glycero-3-phosphocholine	139.155	740.522	1.43577e+06	47202.4	159580	866555	1.00821e+06	1.35763e+06	381166	369310	369419	Glycerophospholipids	-	HMDB0007869	C00157	ko01100//Metabolic pathways;ko01110//Biosynthesis of secondary metabolites;ko00564//Glycerophospholipid metabolism;ko05231//Choline metabolism in cancer;ko04723//Retrograde endocannabinoid signaling;ko00590//Arachidonic acid metabolism;ko00591//Linoleic acid metabolism;ko00592//alpha-Linolenic acid metabolism	Cancers;Global and overview maps;Lipid metabolism;Nervous system	Human Diseases;Metabolism;Organismal Systems
M403T65_NEG	1-o-(9z-octadecenyl)-sn-glycero-2,3-cyclic-phosphate	64.941	403.26	41002	19253.5	23527.8	74630	129355	120222	64196.5	64661.2	54009.8	--	--	--	-	-	-	-
M471T179_NEG	1-o-octyl-2-o-(n-methylcarbamoyl)-sn-glyceryl-3-phosphorylcholine	178.541	471.24	34285.2	50391.6	171034	55098	75479.2	61576.7	63624	64124.1	57479.5	--	--	--	-	-	-	-
M509T150_2_NEG	1-oleoyl-2-hydroxy-sn-glycero-3-phospho-(1'-rac-glycerol)	149.567	509.286	754357	1.88232e+06	1.45388e+06	887642	853860	773300	637998	622224	621960	--	--	--	-	-	-	-
M795T45_NEG	1-oleoyl-2-palmitoyl-sn-glycero-3-phosphocholine	45.2505	794.544	296781	45466.8	38114.4	61347.3	18582.3	93556.5	56141.6	40133.5	56912.6	-	-	HMDB0013426	C00157	ko01100//Metabolic pathways;ko01110//Biosynthesis of secondary metabolites;ko00564//Glycerophospholipid metabolism;ko05231//Choline metabolism in cancer;ko04723//Retrograde endocannabinoid signaling;ko00590//Arachidonic acid metabolism;ko00591//Linoleic acid metabolism;ko00592//alpha-Linolenic acid metabolism	Cancers;Global and overview maps;Lipid metabolism;Nervous system	Human Diseases;Metabolism;Organismal Systems
M417T36_NEG	1-oleoyl-l-.alpha.-lysophosphatidic acid	35.57	417.239	56849.6	6820.27	83110	164079	79644.8	164240	133400	68221.7	133066	--	--	--	-	-	-	-
M782T184_NEG	1-palmitoyl-2-arachidonoyl-sn-glycero-3-phosphoserine	184.223	782.497	63739.6	11900.5	19737.1	13082.9	8320.84	10115.9	13283.2	12556.3	12608.5	Glycerophospholipids	-	HMDB0012361	-	-	-	-
M794T188_NEG	1-palmitoyl-2-docosahexaenoyl-sn-glycero-3-phospho-(1'-rac-glycerol)	187.592	793.523	7242.44	16664.2	25731	5893.87	5442.88	4695.82	4407.02	4399.05	4369.26	--	--	--	-	-	-	-
M483T152_NEG	1-palmitoyl-2-hydroxy-sn-glycero-3-phospho-(1'-rac-glycerol)	151.591	483.27	93408.7	897497	660556	644516	795775	566415	486885	548934	484443	--	--	--	-	-	-	-
M746T35_1_NEG	1-palmitoyl-2-linoleoyl-sn-glycero-3-phospho-(1'-rac-glycerol)	35.213	745.501	545980	27810.6	94379.4	182810	226904	259281	145001	139529	145030	--	--	--	-	-	-	-
M793T136_NEG	1-palmitoyl-2-linoleoyl-sn-glycero-3-phosphocholine	136.143	792.554	418763	28362.6	47274.7	65188	92464	116010	125045	128437	125001	Glycerophospholipids	-	HMDB0007973	C00157	ko01100//Metabolic pathways;ko01110//Biosynthesis of secondary metabolites;ko00564//Glycerophospholipid metabolism;ko05231//Choline metabolism in cancer;ko04723//Retrograde endocannabinoid signaling;ko00590//Arachidonic acid metabolism;ko00591//Linoleic acid metabolism;ko00592//alpha-Linolenic acid metabolism	Cancers;Global and overview maps;Lipid metabolism;Nervous system	Human Diseases;Metabolism;Organismal Systems
M748T36_1_NEG	1-palmitoyl-2-oleoyl-phosphatidylglycerol	35.678	747.516	1.45409e+06	55458.8	153572	358302	406914	371834	195952	186553	196081	--	--	--	-	-	-	-
M717T141_NEG	1-palmitoyl-3-oleoyl-sn-glycero-2-phosphoethanolamine	140.971	716.521	252778	71600.1	106198	226893	241529	241419	87499.5	86024	87468.9	--	--	--	-	-	-	-
M516T166_NEG	1-pentadecanoyl-sn-glycero-3-phosphocholine	166.077	516.293	3518.64	14482.8	17454.7	18914.5	19761.4	18050.9	16713.5	15752.3	14945	--	--	--	-	-	-	-
M338T177_NEG	1-piperidinepropanol, .alpha.-(4-hydroxyphenyl)-.beta.-methyl-4-(phenylmethyl)-, (.alpha.r,.beta.s)-	177.38	338.222	1271.55	13701	28895.8	1186.29	4875.7	4813.19	3412.41	3428.69	3338	--	--	--	-	-	-	-
M798T70_NEG	1-stearoyl-2-arachidonoyl-sn-glycero-3-phospho-(1'-sn-glycerol)	69.907	797.53	98430.9	48214.9	59515.9	53978.7	34307.2	35547.7	31171.5	31094	25863	--	--	--	-	-	-	-
M811T183_NEG	1-stearoyl-2-arachidonoyl-sn-glycero-3-phosphoserine	182.666	810.527	330210	4410.37	9995.5	6475.17	5155.12	5855.22	19206.2	19054.8	19460.3	Glycerophospholipids	-	HMDB0012383	-	-	-	-
M437T187_NEG	1-stearoyl-2-hydroxy-sn-glycero-3-phosphate	187.171	437.252	6997.89	22550.3	19969.1	35903.9	41988.4	30074.5	31257.5	29019.9	29057.5	--	--	--	-	-	-	-
M787T186_NEG	1-stearoyl-2-linoleoyl-sn-glycero-3-phospho-l-serine	185.937	786.527	579236	13238.4	21791	20742.3	15665.1	14231.5	33078	30628.9	30673.4	--	--	--	-	-	-	-
M776T35_1_NEG	1-stearoyl-2-oleoyl-sn-glycero-3-phospho-(1'-sn-glycerol)	35.082	775.545	391317	29869.9	116688	114600	119709	110056	70746.9	75271.2	70683.3	Glycerophospholipids	-	HMDB0010604	-	-	-	-
M243T278_NEG	1,11-undecanedicarboxylic acid	278.211	243.159	2289.17	4667.08	5921.77	11870.2	8371.89	11942.7	8853.46	8851.74	8814.3	Fatty Acyls	505-52-2	HMDB0002327	-	-	-	-
M165T254_NEG	1,2-benzenedicarboxylic acid	254.081	165.019	36721.2	38703.6	47958.7	50450	36207.8	64560.2	47363.9	47424.7	45384.9	Benzene and substituted derivatives	88-99-3	HMDB0002107	C01606	ko01100//Metabolic pathways;ko01120//Microbial metabolism in diverse environments;ko02010//ABC transporters;ko01220//Degradation of aromatic compounds	Global and overview maps;Membrane transport	Environmental Information Processing;Metabolism
M591T157_NEG	1,2-dimyristoyl-sn-glycero-3-phosphate	156.979	591.424	2894.73	16778.1	17210.7	51496	31410.9	26894.3	14816.3	14799.4	14624.8	--	--	--	-	-	-	-
M699T34_4_NEG	1,2-dioleoyl-sn-glycero-3-phosphate	33.846	699.498	181552	11154.9	43167.5	98929.6	123294	114412	64100.1	66169.2	64080.2	Glycerophospholipids	14268-17-8	HMDB0007865	-	-	-	-
M770T35_1_NEG	1,2-dioleoyl-sn-glycero-3-phospho-l-serine	35.213	769.503	1.64175e+06	14439.2	87503.9	185142	299185	363878	306781	301804	304279	--	--	--	-	-	-	-
M757T56_NEG	1,2-dioleoyl-sn-glycero-3-phosphoethanolamine-n-methyl	55.866	756.551	42236.2	10328.5	7670.26	16760	22804.4	20707.6	13290.3	11378.4	13303.3	Glycerophospholipids	-	HMDB0010565	-	-	-	-
M810T34_NEG	1,2-dipalmitoyl-sn-glycero-3-phospho-(1'-myo-inositol)	34.173	809.532	58747.3	10993.7	23811.3	22579.9	14606.4	21700.3	22526.9	22990.5	22524.8	--	--	--	-	-	-	-
M721T37_2_NEG	1,2-dipalmitoyl-sn-glycero-3-phospho-(1'-rac-glycerol)	36.6615	721.499	162180	53816.6	84775.7	169767	131352	97112.3	98957.5	83536.9	96830.6	--	--	--	-	-	-	-
M778T134_NEG	1,2-distearoyl-sn-glycero-3-phospho-(1'-rac-glycerol)	133.542	777.561	230468	7475.07	23643.8	41020.7	41587.3	54531.1	37163.6	36732.6	36731.5	--	--	--	-	-	-	-
M791T138_NEG	1,2-distearoyl-sn-glycero-3-phospho-l-serine	138.475	790.543	424094	18684.6	34558.4	92184.8	119672	167907	184140	182503	182514	--	--	--	-	-	-	-
M774T39_NEG	1,3,5-trimethyl-2,4,6-tris(3,5-di-tert-butyl-4-hydroxybenzyl) benzene	38.533	773.589	10448	7185.35	10403.8	6246.81	6572.18	14114.4	13201.4	7842.55	5297.92	--	--	--	-	-	-	-
M447T48_NEG	1,3,5(10)-estratrien-3,17.beta.-diol 17-glucosiduronate	47.5795	447.203	15578.4	67309.1	172051	137567	46377.5	90335.7	57166.5	57169.8	55918.1	--	--	--	-	-	-	-
M477T86_NEG	1,4-bis[(p-hydroxyphenethyl)amino]anthraquinone	85.69	477.177	11721.4	43628.6	61617.9	119336	116335	176788	126579	137872	126491	--	--	--	-	-	-	-
M317T361_NEG	1,4-d-xylobiose	360.902	317.053	1581.21	1421.94	5482.27	26562.7	16114.9	24229.2	14019.6	14300.2	14295.4	--	--	--	C01630	ko02010//ABC transporters	Membrane transport	Environmental Information Processing
M481T26_NEG	1.alpha.-methyl-5.alpha.-androstan-3.alpha.,17.beta.-diol glucuronide	26.15	481.297	202008	1.06029e+06	758467	741911	814200	821162	842815	828564	828845	--	--	--	-	-	-	-
M329T119_NEG	11beta-hydroxyprogesterone	118.777	329.232	45211	17476.7	29417.5	90620.7	154305	105874	72642.9	70670.9	70684.2	Steroids and steroid derivatives	600-57-7	HMDB0004031	C05498	ko00140//Steroid hormone biosynthesis	Lipid metabolism	Metabolism
M299T57_NEG	13-hydroxy-9z,11e-octadecadienoic acid	57.357	299.258	151819	3.58698e+06	985855	333433	268102	264466	600031	600164	592435	Fatty Acyls	18104-45-5	HMDB0112194	-	-	-	-
M293T37_NEG	13-OxoODE	36.6295	293.211	38005	19521.8	24803.4	34729.9	72870.3	46143.6	41420	41398.5	42230.1	Fatty Acyls	-	HMDB0004668	C14765	ko00591//Linoleic acid metabolism	Lipid metabolism	Metabolism
M279T98_NEG	13,14-dihydro-15-ketotetranorprostaglandin d2	98.044	279.159	8308.04	42544.9	37796.7	37423.7	25966.5	32337.7	23859.5	22932.2	23865.7	--	--	--	-	-	-	-
M295T36_NEG	13(S)-HODE	36.46	295.227	65882.4	54420.1	60145.4	79662.4	94128.4	89824	78503.7	76646.5	76716.2	--	--	--	C14762	ko00591//Linoleic acid metabolism;ko03320//PPAR signaling pathway	Endocrine system;Lipid metabolism	Metabolism;Organismal Systems
M648T291_NEG	14-benzoylaconine	290.51	648.298	458.649	951.92	2410.8	4551.68	5293.21	9985.91	3044.18	3068.48	3014.54	--	--	--	-	-	-	-
M365T34_NEG	15-cyclohexylpentanorprostaglandin f2.alpha.	34.179	365.236	418750	6.31531e+06	2.63872e+06	1.42128e+06	1.06852e+06	1.00052e+06	2.06308e+06	2.05112e+06	2.06317e+06	--	--	--	-	-	-	-
M339T230_NEG	15-ketoiloprost	229.931	339.216	1345.21	6350.18	8558.29	8711.97	8533.31	10199.8	9009.81	8707.34	8706.37	--	--	--	-	-	-	-
M271T52_NEG	16-hydroxyhexadecanoic acid	51.899	271.227	679300	7.5862e+06	4.85701e+06	1.00134e+06	485703	499369	1.17992e+06	1.16919e+06	1.16063e+06	Fatty Acyls	-	HMDB0006294	C18218	ko01100//Metabolic pathways	Global and overview maps	Metabolism
M335T194_NEG	16-phenyltetranorprostaglandin e2	193.503	335.185	3870.71	15978.1	18796.1	18849.8	15801.8	19004.9	15090.2	15339.8	15077.2	--	--	--	-	-	-	-
M355T29_2_NEG	16-phenyltetranorprostaglandin f2.alpha.	28.961	355.192	332072	185820	155366	391807	354301	346496	215906	209834	215842	--	--	--	-	-	-	-
M395T29_3_NEG	16,16-dimethyl-6-ketoprostaglandin e1	28.5375	395.243	14159.8	462323	212933	20490.1	10102.2	19998	101896	80598.4	107344	--	--	--	-	-	-	-
M317T332_NEG	17,18-dihydroxy-5z,8z,11z,14z-eicosatetraenoic acid	332.321	317.195	1663.24	4258.47	6405.09	10006.1	7385.76	9991.98	9093.4	9124.86	8591.44	--	--	--	-	-	-	-
M383T27_2_NEG	17,20-dimethylprostaglandin f1.alpha.	27.45	383.278	72035.6	23788	71525.9	126970	105396	101782	84734.3	83888.6	83892.5	--	--	--	-	-	-	-
M337T27_2_NEG	18-carboxydinorleukotriene b4	27.242	337.182	35083.3	71426.8	66199.9	198851	122308	140161	108586	103669	102367	--	--	--	-	-	-	-
M255T62_NEG	18-hydroxy-5z,8z,11z,14z,16e-eicosapentaenoic acid	62.2045	255.196	17094.7	4.061e+06	114047	906450	1.00581e+06	872789	52243.2	52171	46990.6	--	--	--	-	-	-	-
M469T37_2_NEG	18.beta.-glycyrrhetinic acid	36.972	469.329	17518.4	331340	283819	97308.2	104923	92112.1	158169	158179	154922	--	--	--	-	-	-	-
M381T206_NEG	1a,1b-dihomoprostaglandin e1	205.979	381.262	829.087	4619.11	6157.04	8659.66	9741.2	9454	7543.33	7544.53	7818.61	--	--	--	-	-	-	-
M363T142_NEG	1a,1b-dihomoprostaglandin f2.alpha.	142.315	363.251	12516.4	55074.8	76870	80861.5	74619.6	73987.9	75325.3	61660.3	76409	--	--	--	-	-	-	-
M507T468_NEG	1h-imidazo[4,5-c]pyridine-6-carboxylic acid, 1-[[4-(dimethylamino)-3-methylphenyl]methyl]-5-(2,2- diphenylacetyl)-4,5,6,7-tetrahydro-, (6s)-	468.292	507.24	1044.58	675.071	555.283	4298.9	6614.2	9687.97	3124.91	3132.87	2771.76	--	--	--	-	-	-	-
M681T250_NEG	1h-indole-1-pentanoic acid, 3-[(2,2,3,3-tetramethylcyclopropyl)carbonyl]-	250.056	681.371	316.394	121897	51202.7	1006.43	772.489	613.897	16448.7	17016	17014.4	--	--	--	-	-	-	-
M337T36_1_NEG	2-(2-hydroxybut-3-en-2-yl)-3a,6,6,9a-tetramethyl-2,4,5,5a,7,8,9,9b-octahydro-1h-benzo[e][1]benzofuran-4,5-diol	36.061	337.236	127656	15118.1	336270	662972	556438	430794	32604.7	23644.4	24132.7	--	--	--	-	-	-	-
M153T442_NEG	2-(2-hydroxyethoxy)phenol	441.567	153.055	2882.46	506.961	479.071	2586.08	2443.34	2774.09	4047.46	4113.06	4047.4	--	--	--	-	-	-	-
M194T94_NEG	2-(n-morpholino)ethanesulfonic acid	93.809	194.048	71576.9	65884.1	103575	21454.7	46698.1	59455.1	45861.9	45860.6	48981.1	--	--	--	-	-	-	-
M269T231_NEG	2-[2-(4-methoxyphenyl)-2-oxoethyl]benzoic acid	230.889	269.076	10521.2	2356.42	3371.34	2626.54	4771.76	5832.17	5153.91	5095.74	5095.99	--	--	--	-	-	-	-
M417T82_NEG	2-acetyl-6-[(3-butanoyl-2,4,6-trihydroxy-5-methylphenyl)methyl]-3,5-dihydroxy-4,4-dimethylcyclohexa-2,5-dien-1-one	82.007	417.168	9660.95	120415	138593	109538	92916.2	104989	78222.8	82037.4	78239.2	--	--	--	-	-	-	-
M522T232_NEG	2-amino-3-[hydroxy-[2-hydroxy-3-[octadec-9-enoyl]oxypropoxy]phosphoryl]oxypropanoic acid	231.862	522.281	131589	21936.6	67609.7	52154.4	77898.1	70463.7	82595.5	82597.7	81468.1	--	--	--	-	-	-	-
M160T404_NEG	2-aminoadipic acid	403.909	160.061	35802.1	2037.81	12339.1	2121.98	5308.11	5446.71	18031.4	16487.7	18026.2	Carboxylic acids and derivatives	542-32-5	HMDB0000510	C00956	ko01100//Metabolic pathways;ko01110//Biosynthesis of secondary metabolites;ko01130//Biosynthesis of antibiotics;ko01230//Biosynthesis of amino acids;ko01210//2-Oxocarboxylic acid metabolism;ko00310//Lysine degradation;ko00300//Lysine biosynthesis	Amino acid metabolism;Global and overview maps	Metabolism
M249T291_NEG	2-aminoethylphosphonic acid	290.752	249.021	16729.1	8.9032e+06	8.21694e+06	8.75998e+06	1846.75	1061.1	5727.7	6202.72	5722	Organic phosphonic acids and derivatives	2041-14-7	HMDB0011747	C03557	ko01100//Metabolic pathways;ko01120//Microbial metabolism in diverse environments;ko02010//ABC transporters	Global and overview maps;Membrane transport	Environmental Information Processing;Metabolism
M739T140_1_NEG	2-arachidonoyl-1-palmitoyl-sn-glycero-3-phosphoethanolamine	139.826	738.507	803029	28106.7	76174.3	268642	362489	519493	250910	250969	248990	--	--	--	-	-	-	-
M517T277_NEG	2-heptyl-4-hydroxyquinoline n-oxide	277.231	517.313	403.397	5210.06	5926.54	1502.71	744.745	1729.56	2855.97	2671.7	2673.88	--	--	--	-	-	-	-
M167T325_NEG	2-hydroxy-3-methoxybenzoic acid	324.631	167.034	8696.07	5285.68	4766.39	19047	12686.7	11583.5	11176.3	11173.8	11704.5	Benzene and substituted derivatives	877-22-5	HMDB0059713	-	-	-	-
M186T223_2_NEG	2-hydroxy-6-methylquinoline-3-carbaldehyde	223.137	186.045	200412	76.8073	1171.75	20513.1	36547.3	37975.7	77313.6	79106.1	77289.4	--	--	--	-	-	-	-
M150T60_1_NEG	2-hydroxyadenine	59.6115	150.022	32487.8	5527.62	67774.9	687992	688593	21122.4	42235.1	26075.5	42236.5	Imidazopyrimidines	3373-53-3	HMDB0000403	-	-	-	-
M243T55_NEG	2-hydroxymyristic acid	54.692	243.196	44426.1	471994	264668	66541.2	49693.7	52520.2	100225	101723	99655.1	Fatty Acyls	2507-55-3	HMDB0002261	-	-	-	-
M193T382_NEG	2-keto-d-gluconic acid	382.127	193.035	103887	13588.6	34201.6	226557	219356	234001	177665	173604	173803	--	--	--	C06473	ko01100//Metabolic pathways;ko01120//Microbial metabolism in diverse environments;ko00030//Pentose phosphate pathway	Carbohydrate metabolism;Global and overview maps	Metabolism
M193T349_NEG	2-keto-l-gulonic acid	349.045	193.035	49295.3	4699.71	9993.92	31749.1	38572.7	54396.8	29942.4	29951.5	30679.5	--	--	--	-	-	-	-
M715T141_NEG	2-linoleoyl-1-palmitoyl-sn-glycero-3-phosphoethanolamine	141.156	714.507	343145	27031.3	86090.7	285951	337878	373752	118352	118260	122129	--	--	--	-	-	-	-
M361T82_NEG	2-methoxy-6-pentadecylbenzoic acid	81.9625	361.273	18516.4	173510	274328	293202	146485	133340	185555	180517	221628	--	--	--	-	-	-	-
M117T140_NEG	2-methyl-3-hydroxybutyric acid	139.671	117.055	155940	15241.6	32327.9	29526	45161.2	38955.3	61910.9	72077.2	76348.9	Fatty Acyls	473-86-9	HMDB0000354	-	-	-	-
M296T220_NEG	2-methylguanosine	220.387	296.099	4188.22	1028.31	1797.98	2281.09	2314.99	2345.03	2927.82	2786.45	2787.02	Purine nucleosides	2140-77-4	HMDB0005862	-	-	-	-
M760T138_2_NEG	2-oleoyl-1-palmitoyl-sn-glycero-3-phosphoserine	138.193	760.491	60564	3187.43	13928.3	15863.4	22206.7	29723.9	47211.8	48955.1	47204.6	--	--	--	-	-	-	-
M141T303_NEG	2-Oxoadipic acid	302.772	141.016	194346	145474	154346	166590	159530	169640	169904	193880	169937	Keto acids and derivatives	3184-35-8	HMDB0000225	C00322	ko01100//Metabolic pathways;ko01120//Microbial metabolism in diverse environments;ko01130//Biosynthesis of antibiotics;ko01230//Biosynthesis of amino acids;ko01210//2-Oxocarboxylic acid metabolism;ko00380//Tryptophan metabolism;ko00310//Lysine degradation;ko00300//Lysine biosynthesis	Amino acid metabolism;Global and overview maps	Metabolism
M167T269_NEG	2-phosphonobutyric acid	269.497	167.011	2457.9	4306.07	5848.2	886.185	12126	11396.6	8758.42	8762.42	8430.39	--	--	--	-	-	-	-
M279T293_NEG	2-propenamide, 2-cyano-3-(3,4-dihydroxyphenyl)-n-phenyl-, (2e)-	293.152	279.088	24728.9	1881.66	4936.09	1894.79	13704.4	10756.7	12936.6	12941.3	13362.3	--	--	--	-	-	-	-
M153T235_NEG	2,3-dihydroxybenzoic acid	234.989	153.019	8751.14	2367.8	4463.76	6680.52	6832.18	6566.01	7590.17	7517.3	8037.63	Benzene and substituted derivatives	303-38-8	HMDB0000397	C00196	ko01110//Biosynthesis of secondary metabolites;ko01120//Microbial metabolism in diverse environments;ko01130//Biosynthesis of antibiotics	Global and overview maps	Metabolism
M189T87_NEG	2,4-dichlorobenzoic acid	86.586	189.003	144259	9193.96	15448.6	12506.4	14442.3	11205.8	58026.3	70018.6	57747.8	--	--	--	C06670	ko01100//Metabolic pathways;ko01120//Microbial metabolism in diverse environments	Global and overview maps	Metabolism
M213T19_NEG	2,4-dihydroxybenzophenone	18.89	213.055	1119.65	1027.84	561.429	1143.58	825.091	848.197	431.649	424.736	508.462	--	--	--	-	-	-	-
M220T2_NEG	2,6-di-tert-butyl-4-methoxyphenol	1.7535	220.147	510020	399050	262402	327521	552996	534850	334444	333759	370076	--	--	--	-	-	-	-
M202T264_NEG	2,8-quinolinediol	264.395	202.071	6497.8	41612.9	64633.8	8781.54	7470.33	10697.1	8409.1	14077.7	8888.67	--	--	--	-	-	-	-
M330T467_NEG	2'-Deoxyadenosine 5'-monophosphate (dAMP)	467.099	330.053	3259	914.139	1514.9	4877.95	2717.51	3140.91	2836.53	2825.13	2842.51	--	--	--	C00360	ko01100//Metabolic pathways;ko00230//Purine metabolism	Global and overview maps;Nucleotide metabolism	Metabolism
M331T46_NEG	2'-Deoxyinosine 5'-monophosphate	45.702	331.069	12265.6	45146.6	62786	114916	64044.7	67252.2	56273	53475.1	56298.9	Purine nucleotides	3393-18-8	HMDB0006555	C06196	ko00230//Purine metabolism	Nucleotide metabolism	Metabolism
M271T294_NEG	2',6'-dihydroxy 4'-methoxydihydrochalcone	293.933	271.118	2107.27	6128.61	3963.73	4195.03	3212.88	5038.02	3482.49	3488.96	3757.96	--	--	--	-	-	-	-
M331T159_NEG	21-Hydroxypregnenolone	159.464	331.247	18957.5	55560.1	86411.7	201881	174905	154602	125945	125940	125391	Steroids and steroid derivatives	1164-98-3	HMDB0004026	C05485	ko00140//Steroid hormone biosynthesis	Lipid metabolism	Metabolism
M182T378_NEG	2s-amino-4-phosphonobutyric acid	377.673	182.022	620.755	4505.53	5503.55	6827.49	7881.35	2939.48	9384.34	11261.7	11249.9	--	--	--	-	-	-	-
M165T147_NEG	3-(3-Hydroxyphenyl)propanoic acid	147.266	165.055	171356	43604.5	111977	96019.2	291685	141470	147886	155047	147751	Phenylpropanoic acids	621-54-5	HMDB0000375	C11457	ko01120//Microbial metabolism in diverse environments;ko00360//Phenylalanine metabolism;ko01220//Degradation of aromatic compounds	Amino acid metabolism;Global and overview maps	Metabolism
M236T29_NEG	3-(cyclohexylamino)-2-hydroxy-1-propanesulfonic acid	28.533	236.095	32116.5	20555.6	15371.4	44541	76450.2	48163.9	58100.3	57951.5	58100.2	--	--	--	-	-	-	-
M917T459_NEG	3-[(2s,3r,4s,5r,6r)-3-[(2s,3r,4r,5s,6s)-3,5-dihydroxy-6-methyl-4-[(2s,3r,4s,5s,6r)-3,4,5-trihydroxy-6-(hydroxymethyl)oxan-2-yl]oxyoxan-2-yl]oxy-4,5-dihydroxy-6-[[(2r,3r,4r,5r,6s)-3,4,5-trihydroxy-6-methyloxan-2-yl]oxymethyl]oxan-2-yl]oxy-2-(3,4-dihydroxyphenyl)-5,7-dihydroxychromen-4-one	459.199	917.264	3801.02	90.9816	55.4287	79.1718	278.206	212.175	1069.14	1067.89	1022.53	--	--	--	-	-	-	-
M915T476_NEG	3-[(2s,3r,4s,5s,6r)-4,5-dihydroxy-3-[(2s,3r,4r,5r,6s)-3,4,5-trihydroxy-6-methyloxan-2-yl]oxy-6-[[(2s,3r,4r,5r,6s)-3,4,5-trihydroxy-6-methyloxan-2-yl]oxymethyl]oxan-2-yl]oxy-5-hydroxy-2-(4-hydroxyphenyl)-6-methoxy-7-[(2s,3r,4r,5r,6s)-3,4,5-trihydroxy-6-methyloxan-2-yl]oxychromen-4-one	476.144	915.288	3237.92	279.361	741.343	707.777	1955.01	1976.73	2021.95	2009.19	1946.05	--	--	--	-	-	-	-
M138T275_NEG	3-amino-1-propanesulfonic acid	275.043	138.041	29144.9	3596.58	5861.38	4637.24	12734.5	12378.5	7073.13	7414.33	7079.57	--	--	--	-	-	-	-
M138T40_NEG	3-aminopyrazine-2-carboxylic acid	40.1455	138.055	17965.8	8946.2	73184.1	49553.8	36548.9	49655.9	50402.5	50458.1	49094.9	--	--	--	-	-	-	-
M405T191_NEG	3-dehydrocholic acid	190.838	405.263	87139.9	552820	1.0452e+06	646318	468338	485963	487169	495615	487199	Steroids and steroid derivatives	2304-89-4	HMDB0000502	-	-	-	-
M535T210_NEG	3-deoxy-d-glycero-d-galacto-2-nonulosonic acid	209.964	535.152	11192.7	2448.14	3080.08	875.129	3975.5	7489.57	5499.65	5501.35	5816.25	Organooxygen compounds	22594-61-2	HMDB0000425	-	-	-	-
M507T616_NEG	3-furancarboxylic acid, tetrahydro-4-methylene-2-octyl-5-oxo-, (2r,3s)-	616.392	507.311	49.0015	10729.3	27060.9	174.631	5078.4	25.9094	1854.55	2344.24	2346.04	--	--	--	-	-	-	-
M168T339_NEG	3-Guanidinopropanoate	338.666	168.017	48454.6	2540.16	2080.56	3985.59	8564.31	9123.19	11881.5	11634.1	11891.3	Organonitrogen compounds	-	HMDB0013222	-	-	-	-
M253T88_NEG	3-hydroxy-1a,5-bis(hydroxymethyl)-5,6b-dimethyl-1,3,3a,4,6,6a-hexahydrocyclopropa[e]inden-2-one	87.827	253.143	9132.26	30562.1	44038.5	53945.6	26617.4	55378.1	22251.8	20871.8	22434.5	--	--	--	-	-	-	-
M161T387_2_NEG	3-hydroxy-3-methylglutaric acid	387.376	161.045	371314	46246.2	104692	198955	269879	290008	318186	319122	316213	Fatty Acyls	-	HMDB0059737	-	-	-	-
M193T148_NEG	3-hydroxy-4-methoxycinnamic acid	148.34	193.05	3087.23	13164.1	19183	26875.2	26608.7	55680.2	32366.8	29848.6	31934.1	Cinnamic acids and derivatives	537-73-5	HMDB0000955	-	-	-	-
M327T32_NEG	3-hydroxy-6,2',4'-trimethoxyflavone	32.1985	327.074	15349.2	15706.9	31581.9	467275	284710	360962	259921	262869	259914	--	--	--	-	-	-	-
M267T422_NEG	3-hydroxy-7-methoxyflavone	421.978	267.051	1615.6	2430.25	2483.67	3085.58	8912.38	1664.88	3573.76	3328.38	3333.35	--	--	--	-	-	-	-
M147T390_NEG	3-hydroxyglutaric acid	389.64	147.029	238860	10715.9	19421	36855.7	25082.8	40354.5	29413.8	29529.7	29855.7	Hydroxy acids and derivatives	638-18-6	HMDB0000428	-	-	-	-
M99T368_NEG	3-Hydroxyisovaleric acid	368.398	99.0446	3990.27	107074	147087	190733	178391	185576	1443.8	1326.15	1252.15	Fatty Acyls	625-08-1	HMDB0000754	-	-	-	-
M206T112_NEG	3-hydroxykynurenine	111.656	206.045	37733.4	68437.5	90713.3	133832	55648.4	111725	76304.3	63780.6	76181.2	Organooxygen compounds	484-78-6	HMDB0000732	-	-	-	-
M519T28_NEG	3-hydroxystanozolol glucuronide	27.636	519.276	21679.9	217535	223592	58148.3	46007.8	46469.9	119020	113678	115056	--	--	--	-	-	-	-
M189T147_NEG	3-Indolepropionic acid	146.859	189.076	48947	52983.1	64557.8	41868.7	28744.2	75156.6	67086.3	66457.5	66463.7	Indoles and derivatives	830-96-6	HMDB0002302	-	-	-	-
M471T105_NEG	3-ketofusidic acid	105.479	471.31	31791.6	563429	733732	309794	333905	335997	330368	309488	330585	--	--	--	-	-	-	-
M245T25_NEG	3-Methoxy-4-Hydroxyphenylglycol Sulfate	24.643	245.012	63288.4	29381.7	51349.1	1.04951e+06	445144	424780	432780	427396	427356	Phenols	71324-20-4	HMDB0003332	-	-	-	-
M393T170_NEG	3-methoxylimaprost	169.624	393.262	11824.8	18278.7	54579.5	57609.3	49181.1	61352.2	59094.9	60186.6	60189.6	--	--	--	-	-	-	-
M152T159_NEG	3-methyl-4-nitrophenol	158.785	152.035	84226	51489.1	22986.8	22594.8	33979.2	42290.3	55929.1	55949.1	54682.7	--	--	--	-	-	-	-
M145T327_NEG	3-Methylglutaric acid	327.034	145.05	12332.2	11553.9	21745.1	46997	36388.1	49672.3	41881.3	41232.5	41231.8	Fatty Acyls	626-51-7	HMDB0000752	-	-	-	-
M149T101_2_NEG	3-methylphenylacetic acid	101.315	149.061	1.18787e+06	2.26301e+06	2.94418e+06	7.34726e+06	5.55607e+06	6.82663e+06	3.13764e+06	3.07258e+06	3.07154e+06	Benzene and substituted derivatives	621-36-3	HMDB0002222	-	-	-	-
M739T444_NEG	3-o-neohesperidoside-7-rha kaempferol	444.399	739.223	429.7	191.606	968.005	2261.53	3456.42	2888.16	2079.72	1975.6	2073.73	--	--	--	-	-	-	-
M185T47_NEG	3-Phosphoserine	47.032	185.009	23342.3	62085.2	79870.2	82259.1	159282	107530	123725	129216	123715	Carboxylic acids and derivatives	17885-08-4	HMDB0001721	C01005	ko01100//Metabolic pathways;ko01120//Microbial metabolism in diverse environments;ko01130//Biosynthesis of antibiotics;ko01230//Biosynthesis of amino acids;ko01200//Carbon metabolism;ko00270//Cysteine and methionine metabolism;ko00970//Aminoacyl-tRNA biosynthesis;ko00260//Glycine, serine and threonine metabolism	Amino acid metabolism;Global and overview maps;Translation	Genetic Information Processing;Metabolism
M159T76_NEG	3,3-Dimethylglutaric acid	75.65	159.066	34554.6	251825	179005	62959.6	49478.5	73303.3	97401.7	109114	97490.8	Fatty Acyls	4839-46-7	HMDB0002441	-	-	-	-
M181T348_NEG	3,4-dihydroxyhydrocinnamic acid	347.921	181.009	277182	263764	391532	555521	539839	591965	552977	553012	547163	Phenylpropanoic acids	-	HMDB0134042	C10447	ko00350//Tyrosine metabolism	Amino acid metabolism	Metabolism
M287T149_NEG	3,4,2',4',6'-pentahydroxychalcone	149.166	287.043	1977.17	8075.44	78171.1	21769.8	59369.1	29474.2	38830.1	39001.9	52799.5	--	--	--	-	-	-	-
M203T223_NEG	3,5-dihydroxydecanoic acid	222.657	203.128	3924.35	12135.1	21493.7	18411	24587.8	35196.8	26268.5	26266.4	26629.9	--	--	--	-	-	-	-
M189T182_NEG	3,6-dimethyl-4-hydroxycoumarin	181.561	189.076	22698.9	39228.6	50508.5	70931	56962	69019.6	37714.8	37811.7	34987.7	--	--	--	-	-	-	-
M780T114_NEG	3.alpha.-hydroxy-7-oxo-5.beta.-cholanic acid	113.807	779.547	23312.3	18115.5	33038.1	113341	51886.1	71183.8	29181.6	29176.9	30034.4	--	--	--	-	-	-	-
M387T38_NEG	3.alpha.,7.alpha.-dihydroxy-12-oxocholanoic acid	38.391	387.251	56467.9	34173.2	54963.7	85803.2	74880.9	71735.7	45320.6	44696.7	49178.7	--	--	--	-	-	-	-
M303T367_NEG	3.beta.-hydroxymevastatin	366.908	303.144	1194.9	3062.82	2572.91	3555.16	2914.81	4283.97	3593.01	3594.58	3497.44	--	--	--	-	-	-	-
M431T64_NEG	3.beta.,7.alpha.-dihydroxy-5-cholestenoic acid	64.168	431.314	7302.05	121700	61642.5	29907.7	28057.4	25841.8	31226	31227.7	30824.4	Steroids and steroid derivatives	115538-84-6	HMDB0012454	C17335	ko00120//Primary bile acid biosynthesis	Lipid metabolism	Metabolism
M290T340_NEG	3'-.alpha.-sialyl-n-acetyllactosamine	339.981	290.087	14957.6	26355.3	11489.8	3115.22	4743.42	4268	9666.88	9667.6	8853.59	--	--	--	-	-	-	-
M423T216_NEG	3'-hydroxyrepaglinide	216.488	423.272	7673.33	45763.4	133216	44348.4	35574.6	44305.9	36887.9	37276.8	36888.5	--	--	--	-	-	-	-
M373T96_2_NEG	3b-Hydroxy-5-cholenoic acid	96.369	373.272	26451.8	221482	259470	298333	219262	200360	147318	147168	92338.5	Steroids and steroid derivatives	5255-17-4	HMDB0000308	-	-	-	-
M237T172_2_NEG	4-(2-hydroxyethyl)piperazine-1-ethanesulfonic acid	171.963	237.091	83475.1	29733.7	30617.8	29889.5	27974.8	18056.2	28712.5	26124.8	28669.3	--	--	--	-	-	-	-
M151T237_NEG	4-acetoxyphenol	236.975	151.061	21557.3	8927.36	4152.46	5791.1	6533.52	9476.87	14257.7	13700.6	14260.2	--	--	--	C13636	ko01100//Metabolic pathways;ko01120//Microbial metabolism in diverse environments	Global and overview maps	Metabolism
M179T28_NEG	4-hydroxybenzoic acid propyl ester	28.119	179.07	21203.8	1306.47	3798.03	353889	38063.7	104409	134533	133085	134521	Benzene and substituted derivatives	94-13-3	HMDB0032574	-	-	-	-
M163T109_NEG	4-Hydroxycinnamic acid	108.897	163.039	115542	62515.3	94435.2	70294.1	24826.8	96570.6	54943.3	60513.7	52994.6	Cinnamic acids and derivatives	-	HMDB0128076	C00811	ko01100//Metabolic pathways;ko01110//Biosynthesis of secondary metabolites;ko00360//Phenylalanine metabolism;ko00350//Tyrosine metabolism;ko01220//Degradation of aromatic compounds;ko00130//Ubiquinone and other terpenoid-quinone biosynthesis	Amino acid metabolism;Global and overview maps;Metabolism of cofactors and vitamins	Metabolism
M181T288_NEG	4-hydroxyisophthalic acid	288.445	181.013	24429.1	31471.9	32717.8	36959.8	30509.9	36974.2	30532.6	30521.9	32311.1	--	--	--	C21168	ko01120//Microbial metabolism in diverse environments	Global and overview maps	Metabolism
M386T34_1_NEG	4-hydroxytamoxifen	33.75	386.235	119805	4373.54	18691.9	99987.2	85228.2	98729.2	79026.1	76963.7	76926.8	Stilbenes	-	HMDB0060530	C05011	ko00982//Drug metabolism - cytochrome P450	Xenobiotics biodegradation and metabolism	Metabolism
M107T25_NEG	4-methylphenol	24.643	107.05	567258	2640.15	9650.3	182551	135396	188545	151004	153371	153359	Phenols	106-44-5	HMDB0001858	C01468	ko01100//Metabolic pathways;ko01120//Microbial metabolism in diverse environments;ko04974//Protein digestion and absorption;ko01220//Degradation of aromatic compounds	Digestive system;Global and overview maps	Metabolism;Organismal Systems
M208T49_NEG	4-morpholinopropanesulfonic acid	48.719	208.063	12174.8	28311	72319	14730.6	20461.4	14698.5	21960.6	24722.8	21927.9	--	--	--	-	-	-	-
M182T38_NEG	4-pyridoxic acid	37.96	182.045	49127	16393.4	27625.9	155931	68500.5	137457	95608.4	94734.5	80210.3	Pyridines and derivatives	82-82-6	HMDB0000017	C00847	ko01100//Metabolic pathways;ko01120//Microbial metabolism in diverse environments;ko00750//Vitamin B6 metabolism	Global and overview maps;Metabolism of cofactors and vitamins	Metabolism
M152T341_NEG	4,6-diamino-5-formamidopyrimidine	341.283	152.043	161354	6792.94	28791.1	68341.9	95920.2	121362	108006	108018	109075	Diazines	5122-36-1	HMDB0004816	-	-	-	-
M381T25_2_NEG	5-heptenoic acid, 7-[(1r,2r,3s,5s)-2-[(1e,3s)-3-(2,3-dihydro-1h-inden-2-yl)-3-hydroxy-1-propen-1-yl]-3-fluoro-5-hydroxycyclopentyl]-, (5z)-	25.439	381.23	85124.3	1.18995e+06	682440	86467.7	75958.1	75446.7	306757	285894	306501	--	--	--	-	-	-	-
M439T23_NEG	5-hydroxy-l-tryptophan	23.459	439.177	28390.7	28332.5	102074	266227	270440	268859	207522	207507	212151	Indoles and derivatives	4350-09-08	HMDB0000472	C00643	ko01100//Metabolic pathways;ko00380//Tryptophan metabolism;ko04726//Serotonergic synapse	Amino acid metabolism;Global and overview maps;Nervous system	Metabolism;Organismal Systems
M217T405_NEG	5-L-Glutamyl-L-alanine	405.368	217.082	9124.06	9636.49	21787.5	2448.73	2726.64	3702.46	7485.91	7664.87	7485.42	Carboxylic acids and derivatives	5875-41-2	HMDB0006248	C03740	ko01100//Metabolic pathways;ko00480//Glutathione metabolism	Global and overview maps;Metabolism of other amino acids	Metabolism
M197T388_NEG	5,6,7,8-tetrahydro-2-Naphthoic Acid	388.037	197.055	1885.99	2268.91	2082.51	3288.92	1870.34	3623.44	2277.26	1947.13	2293.54	--	--	--	C14111	ko01120//Microbial metabolism in diverse environments	Global and overview maps	Metabolism
M623T234_NEG	5,7-dihydroxy-2-(4-hydroxy-3-methoxyphenyl)-3-[3,4,5-trihydroxy-6-[[(2r,3r,4r,5r,6s)-3,4,5-trihydroxy-6-methyloxan-2-yl]oxymethyl]oxan-2-yl]oxychromen-4-one	233.832	623.16	133.577	2099.18	3397.46	6149.08	1748.71	6572.01	2975.44	2754.71	2741.39	--	--	--	-	-	-	-
M363T46_NEG	5.9-tetracosadienoic acid	46.403	363.325	56439.6	538105	351364	21206.8	20540.2	16390.5	64229.1	63856.8	64814.8	--	--	--	-	-	-	-
M467T140_NEG	5.alpha.-androstan-3.alpha.,17.beta.-diol-o-3-.beta.-glucuronic acid	140.416	467.276	33067.2	259662	783495	401712	309361	252991	244764	240217	244747	--	--	--	-	-	-	-
M337T470_NEG	5'-phosphoribosyl-5-amino-4-imidazolecarboxamide (aicar)	469.726	337.038	87954.9	16780	22719.2	38681.9	20974.6	44375.5	36411.8	37348.4	37352.6	--	--	--	C04677	ko01100//Metabolic pathways;ko01110//Biosynthesis of secondary metabolites;ko01130//Biosynthesis of antibiotics;ko00230//Purine metabolism;ko00340//Histidine metabolism;ko04152//AMPK signaling pathway	Amino acid metabolism;Global and overview maps;Nucleotide metabolism;Signal transduction	Environmental Information Processing;Metabolism
M212T253_NEG	6-(trifluoromethyl)quinolin-4-ol	252.996	212.022	2397.26	266.989	478.294	473.948	1148.81	980.179	1618.47	1608.34	1787.38	--	--	--	-	-	-	-
M168T473_NEG	6-Hydroxydopamine	472.634	168.042	121549	6113.05	6688.48	4328.47	1371.67	14296.9	56329.9	56349.7	51298.9	Phenols	1199-18-4	HMDB0001537	-	-	-	-
M131T122_NEG	6-hydroxyhexanoate	121.975	131.071	29248.6	186812	168119	372162	359021	226141	269555	270473	233198	Hydroxy acids and derivatives	1191-25-9	HMDB0012843	C06103	ko01120//Microbial metabolism in diverse environments;ko01220//Degradation of aromatic compounds	Global and overview maps	Metabolism
M257T422_NEG	6-phosphogluconic acid	422.356	257.029	2334.49	2287.98	3676.08	5926.18	7294.72	6654.51	6844.19	6393.29	6840.91	Organooxygen compounds	921-62-0	HMDB0001316	C00345	ko01100//Metabolic pathways;ko01110//Biosynthesis of secondary metabolites;ko01120//Microbial metabolism in diverse environments;ko01130//Biosynthesis of antibiotics;ko01200//Carbon metabolism;ko00030//Pentose phosphate pathway	Carbohydrate metabolism;Global and overview maps	Metabolism
M471T391_NEG	6,7-dihydroxycoumarin-4-acetic acid	391.311	471.076	9241.08	2287.59	2969.59	4329.13	1592.5	4831.24	2895.22	3017.21	3017.5	--	--	--	-	-	-	-
M617T238_NEG	7-ethyl-10-(4-n-aminopentanoic acid)-1-piperidino)carbonyloxycamptothecin	237.882	617.271	13303.3	3565.83	14375.3	2782.14	2917.14	4577.01	10611	10251.8	10257.9	--	--	--	-	-	-	-
M462T315_NEG	7-methylthioheptyl glucosinolate	314.512	462.089	843.919	132.567	405.699	552.56	306.866	208.592	646.145	647.207	741.209	--	--	--	C17252	ko01110//Biosynthesis of secondary metabolites;ko01210//2-Oxocarboxylic acid metabolism	Global and overview maps	Metabolism
M769T476_NEG	7-o-methylquercetin-3-o-galactoside-6''-rhamnoside	476.083	769.235	4883.88	2215.48	4236.28	5992.29	15818.2	9748.95	10925.4	10785.5	10837.6	--	--	--	-	-	-	-
M335T36_2_NEG	7,7-dimethyl-(5z,8z)-eicosadienoic acid	36.383	335.294	93634.1	126458	105944	40679.7	73980.9	54430.1	106811	106874	101993	--	--	--	-	-	-	-
M495T155_NEG	7.alpha.,17.alpha.-dimethyl-5.beta.-androstane-3.alpha.,17.beta.-diol glucuronide	155.208	495.306	45902	63074	52555	59570	45947.6	43127.1	33312.7	32594.9	32594.1	--	--	--	-	-	-	-
M361T141_NEG	7(s),17(s)-dihydroxy-8(e),10(z),13(z),15(e),19(z)-docosapentaenoic acid	140.796	361.236	28617.8	56756.3	140653	132546	102854	120697	119684	119662	111120	--	--	--	-	-	-	-
M329T37_3_NEG	7Z, 10Z, 13Z, 16Z, 19Z-Docosapentaenoic acid	37.359	329.247	2.96366e+06	254274	274339	220270	515100	511094	758665	758829	746580	--	--	--	-	-	-	-
M291T29_NEG	8-(2-hydroxy-3-methoxy-3-methylbutyl)-7-methoxychromen-2-one	28.85	291.126	23080.8	59255	20437.9	277355	126288	122084	119771	111756	119733	--	--	--	-	-	-	-
M297T166_NEG	8-(4-hydroxyphenyl)-3-methoxy-6,7-dimethyl-5,6,7,8-tetrahydronaphthalen-2-ol	166.013	297.169	3594.95	12361.3	15135.3	14972.7	19894.4	12395.9	18950.5	17583.3	17620.1	--	--	--	-	-	-	-
M279T150_NEG	8-carboxy-3-methylflavone	149.956	279.064	7393.18	74969.8	113127	43031.1	25784.4	37606.3	31397.7	31396.5	31860.1	--	--	--	-	-	-	-
M351T615_NEG	8-iso-15-ketoprostaglandin f2.alpha.	615.402	351.219	26.9265	84318.3	2048.13	285.56	575.771	793.546	1550.26	2714.98	2769.72	--	--	--	-	-	-	-
M377T33_2_NEG	9-deoxy-9-methylene-16,16-dimethylprostaglandin e2	33.4745	377.269	15791.6	44249.2	113275	218509	83360.6	166842	91864	92269.9	91861.2	--	--	--	-	-	-	-
M293T53_NEG	9-OxoODE	53.169	293.211	66752.1	57869.2	58331.9	85386.4	138015	99932.4	88193.8	88193.3	86819.8	Fatty Acyls	-	HMDB0004669	C14766	ko00591//Linoleic acid metabolism	Lipid metabolism	Metabolism
M341T30_NEG	9-phenyl-1-(2,4,6-trihydroxyphenyl)nonan-1-one	29.799	341.178	217201	115922	113406	245965	276718	98016	255636	289782	289659	--	--	--	-	-	-	-
M363T178_NEG	9s,11r,15s-trihydroxy-20a,20b-dihomo-5z,13e-prostadienoic acid	177.974	363.252	26551.3	59419.9	67861.7	182230	162052	189731	123619	118576	117434	--	--	--	-	-	-	-
M367T144_NEG	Acacetin diacetate	144.411	367.097	10873.5	18512.1	27762.2	26345	30782.4	22046.8	31109	28648.5	31432.5	--	--	--	-	-	-	-
M180T33_NEG	Acamprosate	32.812	180.033	33498.5	18903.2	21481.3	130873	766277	174490	194245	194256	190220	Organic sulfonic acids and derivatives	77337-76-9	HMDB0014797	-	-	-	-
M101T81_NEG	Acetoacetic acid	81.484	101.024	3.3872e+06	43160.4	32993.4	33402.7	6579.08	10509.8	27191	26916.4	26915.2	Keto acids and derivatives	541-50-4	HMDB0000060	C00164	ko01100//Metabolic pathways;ko01120//Microbial metabolism in diverse environments;ko00350//Tyrosine metabolism;ko00310//Lysine degradation;ko00280//Valine, leucine and isoleucine degradation;ko00650//Butanoate metabolism;ko00640//Propanoate metabolism;ko00072//Synthesis and degradation of ketone bodies	Amino acid metabolism;Carbohydrate metabolism;Global and overview maps;Lipid metabolism	Metabolism
M172T187_NEG	Acetyl-dl-leucine	187.03	172.097	11887.6	29391.5	44383.6	6219.87	8736.21	9261.43	18776.7	18776.6	19102.5	Carboxylic acids and derivatives	1188-21-2	HMDB0011756	-	-	-	-
M426T455_NEG	Adenosine 5'-diphosphate	454.778	426.02	18089.7	1584.88	2931.83	1430.78	2408.44	2559.54	4854.64	4841.5	5908.14	Purine nucleotides	58-64-0	HMDB0001341	C00008	ko01100//Metabolic pathways;ko01110//Biosynthesis of secondary metabolites;ko01130//Biosynthesis of antibiotics;ko00230//Purine metabolism;ko04080//Neuroactive ligand-receptor interaction;ko04742//Taste transduction;ko04152//AMPK signaling pathway;ko05012//Parkinson disease;ko04924//Renin secretion;ko04611//Platelet activation;ko04068//FoxO signaling pathway;ko00190//Oxidative phosphorylation;ko0…	Endocrine system;Energy metabolism;Global and overview maps;Immune system;Neurodegenerative diseases;Nucleotide metabolism;Sensory system;Signal transduction;Signaling molecules and interaction;Transport and catabolism	Cellular Processes;Environmental Information Processing;Human Diseases;Metabolism;Organismal Systems
M346T424_NEG	Adenosine 5'-phosphosulfate	423.848	346.054	64496.7	7778.58	16509.3	7369.64	13434	10539.6	42388.3	43326.9	42388.9	Purine nucleotides	485-84-7	HMDB0001003	C00224	ko01100//Metabolic pathways;ko01120//Microbial metabolism in diverse environments;ko01130//Biosynthesis of antibiotics;ko00230//Purine metabolism;ko00261//Monobactam biosynthesis;ko00920//Sulfur metabolism	Biosynthesis of other secondary metabolites;Energy metabolism;Global and overview maps;Nucleotide metabolism	Metabolism
M618T432_NEG	ADP-ribose	432.017	618.084	1155.94	45.4225	274.941	217.014	131.166	295.551	671.962	646.067	647.361	Purine nucleotides	20762-30-5	HMDB0001178	C00301	ko00230//Purine metabolism	Nucleotide metabolism	Metabolism
M397T224_NEG	Agaric acid	223.531	397.257	433.13	8119.87	8795.58	6224.94	4043.1	5981.91	6256.09	6239.42	5419.08	--	--	--	-	-	-	-
M465T127_NEG	Agnuside	127.096	465.141	16679.1	8501.79	22529.6	435088	381768	298039	432722	378191	381252	Prenol lipids	11027-63-7	HMDB0036561	-	-	-	-
M189T319_NEG	Ala-Thr	318.59	189.087	265.011	6081.2	8901.77	2627.23	1077.42	2626.72	1234.42	1488.44	1508.38	Carboxylic acids and derivatives	-	HMDB0028697	-	-	-	-
M359T334_2_NEG	Aldosterone	333.584	359.205	1361.43	7988.37	7815.86	9067.77	6499.42	9899.18	8537.38	8582.98	9339.17	Steroids and steroid derivatives	52-39-1	HMDB0000037	C01780	ko01100//Metabolic pathways;ko00140//Steroid hormone biosynthesis;ko04925//Aldosterone synthesis and secretion;ko04960//Aldosterone-regulated sodium reabsorption	Endocrine system;Excretory system;Global and overview maps;Lipid metabolism	Metabolism;Organismal Systems
M277T42_2_NEG	all cis-(6,9,12)-Linolenic acid	42.433	277.217	372033	54581.9	110345	435137	737393	585309	557187	508400	506862	--	--	--	-	-	-	-
M157T179_2_NEG	Allantoin	178.548	157.036	28580.5	4175.19	11351.8	36916.9	34905.6	40226.9	57353.1	56814.7	56790.3	Azoles	97-59-6	HMDB0000462	-	-	-	-
M417T243_NEG	Aloin	242.798	417.102	2476.4	2047.23	3883.09	20190.4	9295.48	12762	8170.96	8169.28	8284.35	Anthracenes	8015-61-0	HMDB0035219	-	-	-	-
M241T417_NEG	alpha-D-Galactose 1-phosphate	417.237	241.008	3398.23	2354.65	1456.11	6810.66	6460.82	5251.88	7114.76	6786.47	6777.77	--	--	--	C00446	ko01100//Metabolic pathways;ko00520//Amino sugar and nucleotide sugar metabolism;ko00052//Galactose metabolism	Carbohydrate metabolism;Global and overview maps	Metabolism
M115T70_NEG	Alpha-ketoisovaleric acid	69.549	115.04	355427	170002	62492.8	50198.2	12812.5	27205.3	22816.9	23142.9	23141.9	Keto acids and derivatives	759-05-7	HMDB0000019	C00141	ko01100//Metabolic pathways;ko01110//Biosynthesis of secondary metabolites;ko01130//Biosynthesis of antibiotics;ko01230//Biosynthesis of amino acids;ko01210//2-Oxocarboxylic acid metabolism;ko00280//Valine, leucine and isoleucine degradation;ko00770//Pantothenate and CoA biosynthesis;ko00290//Valine, leucine and isoleucine biosynthesis	Amino acid metabolism;Global and overview maps;Metabolism of cofactors and vitamins	Metabolism
M473T27_NEG	Amastatin	26.976	473.255	71477.4	24077.3	49601.9	189393	222177	214735	166241	163498	163448	--	--	--	-	-	-	-
M143T132_NEG	Ammeline	132.059	143.071	128208	159065	128073	50221.5	83766.3	79157.1	79627.8	97836	97947.9	--	--	--	C08733	ko01120//Microbial metabolism in diverse environments	Global and overview maps	Metabolism
M729T495_NEG	Amoxicillin	495.442	729.205	1429.37	471.244	443.979	1862.79	1711.67	1590.75	1360.5	1408.36	1408.73	Lactams	26787-78-0	HMDB0015193	-	-	-	-
M347T95_NEG	Anacardic acid	95.0365	347.257	23990	65215.3	62204.9	295600	163766	156040	81024	80960.4	78248.9	Benzene and substituted derivatives	103904-74-1	HMDB0033896	-	-	-	-
M485T30_3_NEG	Andrastin a	29.863	485.255	235829	27464.8	74133.5	202058	200633	213234	187219	183271	187260	--	--	--	-	-	-	-
M457T24_NEG	Andrastin c	24.17	457.262	265512	117208	368600	936177	853497	861753	740626	721754	740901	--	--	--	-	-	-	-
M427T24_2_NEG	Andrastin d	23.704	427.25	148811	152240	344621	218196	211086	206847	225655	225636	227771	--	--	--	-	-	-	-
M465T210_NEG	Androsterone glucuronide	209.845	465.231	849.229	4729.64	5688.49	6192.93	9279.16	7188.75	5135.41	5478.85	5486.18	Steroids and steroid derivatives	3602-09-03	HMDB0004484	C11135	ko00140//Steroid hormone biosynthesis	Lipid metabolism	Metabolism
M147T229_NEG	Anethole	229.446	147.066	17277.1	3935.85	6947.29	5362.37	4947.16	12332.3	13863.7	14041.7	13989.2	Benzene and substituted derivatives	4180-23-8	HMDB0030837	-	-	-	-
M303T134_NEG	Arachidonic acid (peroxide free)	134.167	303.231	45210.8	5212.26	7556.66	4393.3	7443.5	13609.2	15182.3	15182.7	14961.6	--	--	--	C00219	ko01100//Metabolic pathways;ko04723//Retrograde endocannabinoid signaling;ko00590//Arachidonic acid metabolism;ko00591//Linoleic acid metabolism;ko01040//Biosynthesis of unsaturated fatty acids;ko04923//Regulation of lipolysis in adipocyte;ko04925//Aldosterone synthesis and secretion;ko04611//Platelet activation;ko04726//Serotonergic synapse;ko04750//Inflammatory mediator regulation of TRP channe…	Circulatory system;Endocrine system;Global and overview maps;Immune system;Infectious diseases;Lipid metabolism;Nervous system;Sensory system	Human Diseases;Metabolism;Organismal Systems
M925T325_NEG	Araloside a	325.071	925.476	1085.31	1122.79	785.501	69.8127	273.395	983.024	843.318	791.751	841.791	Prenol lipids	7518-22-1	HMDB0034535	-	-	-	-
M371T298_NEG	Arctigenin	297.599	371.134	43046.2	6514.29	6262.98	6640.49	7711.17	8893.59	11553.1	11551	11007.1	Furanoid lignans	7770-78-7	HMDB0030087	-	-	-	-
M441T23_NEG	Ascorbyl stearate	22.909	441.265	254529	187581	403905	209088	223555	181541	224100	229307	224101	Fatty Acyls	10605-09-1	HMDB0038242	-	-	-	-
M523T29_4_NEG	Asiatic acid	28.961	523.308	219204	2.27302e+06	5.63795e+06	970224	1.03292e+06	960748	2.46924e+06	2.44824e+06	2.46453e+06	--	--	--	-	-	-	-
M247T452_NEG	Asp-Asp	452.088	247.056	21891.6	367.486	610.277	779.773	710.271	1119.14	1963.38	1862.61	2006.96	Carboxylic acids and derivatives	-	HMDB0028749	-	-	-	-
M219T414_NEG	Asp-Ser	414.318	219.062	4552.26	1591.52	538.453	3789.64	1667.57	3433.03	3564.24	3626.99	3562	Carboxylic acids and derivatives	-	HMDB0028762	-	-	-	-
M131T378_NEG	Asparagine	378.154	131.034	14184.1	13056.4	7151.29	55008.7	29767.7	62478.4	33887.2	33554.5	39620.6	Carboxylic acids and derivatives	70-47-3	HMDB0000168	-	-	-	-
M132T405_NEG	Aspartic acid	405.204	132.03	841546	86369.8	145963	42739.6	69532.5	94533.3	233891	234545	234545	Carboxylic acids and derivatives	1783-96-6	HMDB0006483	-	-	-	-
M871T190_NEG	Astragaloside ii	190.293	871.471	80952.4	5177.64	7344.72	8382.6	5475.24	3011.2	2083.37	2232.33	2243.38	--	--	--	-	-	-	-
M283T55_NEG	Avocadyne	54.503	283.228	32037.4	31621.9	48041.5	6386.95	14086.9	11466.2	16534.4	26515.2	16524.8	Fatty Acyls	129099-96-3	HMDB0035473	-	-	-	-
M187T338_2_NEG	Azelaic acid	337.66	187.097	96649.8	134157	193836	306089	256194	342144	255769	255759	258591	Fatty Acyls	123-99-9	HMDB0000784	-	-	-	-
M469T23_NEG	Bazedoxifene	22.909	469.262	46298.7	1.20766e+06	401677	195045	218731	174170	226168	208695	208487	--	--	--	-	-	-	-
M339T37_NEG	Behenic acid	37.153	339.325	310821	248300	154350	403402	249791	235809	165291	165324	162679	Fatty Acyls	112-85-6	HMDB0000944	C08281	ko01040//Biosynthesis of unsaturated fatty acids	Lipid metabolism	Metabolism
M443T428_NEG	Benzamide, n-hydroxy-3-[3-(hydroxyamino)-3-oxo-1-propen-1-yl]-	427.667	443.138	37078.1	2836.5	3652.53	8643.41	7542.72	19873.4	19879.1	19709.6	19880.1	--	--	--	-	-	-	-
M327T215_NEG	Benzeneacetic acid, 5-[2-[4-(ethoxycarbonyl)phenyl]diazenyl]-2-hydroxy-	215.237	327.096	2022.17	26183.8	62014.7	4385.17	4427.41	5092.63	9494.26	9178.12	9160.19	--	--	--	-	-	-	-
M329T144_NEG	Benzoic acid + 1o, 1meo, o-hex	143.818	329.084	6483.26	24075.1	30754.9	73335.8	35576.7	44397	34608.5	33768	34591.2	--	--	--	-	-	-	-
M299T209_NEG	Benzoic acid + 1o, o-hex	209.119	299.075	1779.46	1551.38	4364.6	14482.2	5844.2	7112.7	7678.4	6992.62	7133.81	--	--	--	-	-	-	-
M544T315_NEG	Benzoic acid, 3-[[(3-carboxycyclohexyl)amino]carbonyl]-4-[3-[4-(4-phenoxybutoxy)phenyl]propoxy]-	315.13	544.256	48.5624	587.82	439.61	975.643	751.791	856.46	894.404	944.747	943.62	--	--	--	-	-	-	-
M630T296_NEG	Benzoic acid, 3-[[(3-carboxycyclohexyl)amino]carbonyl]-4-[3-[4-[4-(cyclohexyloxy)butoxy]phenyl]propoxy]-	295.966	630.291	796.655	1371.73	2339.78	7066.05	5532.31	20436.2	4005.18	4002.68	3473.21	--	--	--	-	-	-	-
M434T54_NEG	Benzoic acid, 4-hydroxy-3-[[2-(4-tricyclo[3.3.1.1(3,7)]dec-1-ylphenoxy)acetyl]amino]-, methyl ester	54.4	434.195	5356.17	31313.6	58208.5	45627.4	32743.4	34637.6	30161.8	29796.2	29798.4	--	--	--	-	-	-	-
M615T316_NEG	Bestatin	315.695	615.344	4554.67	242.402	293.272	627.603	2378.76	5710.95	2767.91	2764.15	2888.09	--	--	--	-	-	-	-
M103T231_NEG	Beta-hydroxybutyrate	231.278	103.039	55778.8	7099.69	11114.1	18647	21371.2	19126.7	31203.2	31238	31510.1	Hydroxy acids and derivatives	300-85-6	HMDB0000357	C01089	ko01100//Metabolic pathways;ko04024//cAMP signaling pathway;ko00650//Butanoate metabolism;ko00072//Synthesis and degradation of ketone bodies	Carbohydrate metabolism;Global and overview maps;Lipid metabolism;Signal transduction	Environmental Information Processing;Metabolism
M466T167_NEG	Buprenorphine glucuronide	166.955	466.29	20600.3	103007	79498.3	35452.6	59710.7	65422.4	90292.2	92465.2	92415.5	Organooxygen compounds	-	HMDB0060928	-	-	-	-
M193T264_NEG	Caffeine	264.174	193.071	792.461	392.424	678.501	5861.64	7479.67	10594.3	5494.3	5493.18	5620.29	Imidazopyrimidines	1958-08-02	HMDB0001847	C07481	ko01100//Metabolic pathways;ko01110//Biosynthesis of secondary metabolites;ko01120//Microbial metabolism in diverse environments;ko00232//Caffeine metabolism	Biosynthesis of other secondary metabolites;Global and overview maps	Metabolism
M725T425_NEG	Camelliaside b	425.493	725.192	1355.41	612.041	1800.85	1120.22	1794.35	2320.65	1879.06	1069.39	1887.28	Flavonoids	131573-90-5	HMDB0038767	-	-	-	-
M328T257_NEG	Camp	257.028	328.043	4353.16	782.758	2168.29	7095.01	2363.76	2601.19	2290.51	1531.63	2301.23	Purine nucleotides	60-92-4	HMDB0000058	C00575	ko00230//Purine metabolism;ko04976//Bile secretion;ko04742//Taste transduction;ko04723//Retrograde endocannabinoid signaling;ko04024//cAMP signaling pathway;ko04923//Regulation of lipolysis in adipocyte;ko04918//Thyroid hormone synthesis;ko04925//Aldosterone synthesis and secretion;ko05012//Parkinson disease;ko05200//Pathways in cancer;ko04922//Glucagon signaling pathway;ko04924//Renin secretion;…	Aging;Cancers;Cardiovascular diseases;Cell growth and death;Cellular community - eukaryotes;Circulatory system;Digestive system;Endocrine system;Environmental adaptation;Excretory system;Immune system;Infectious diseases;Nervous system;Neurodegenerative diseases;Nucleotide metabolism;Sensory system;Signal transduction;Substance dependence	Cellular Processes;Environmental Information Processing;Human Diseases;Metabolism;Organismal Systems
M347T33_NEG	Camptothecin	33.008	347.115	48754.4	35570.1	72537	363563	322779	386205	213420	211983	211985	--	--	--	-	-	-	-
M331T51_NEG	Carbaprostacyclin	50.709	331.226	5562.24	41837	31355.8	2212.16	9543.61	10866.4	12169.8	11783.4	12019	--	--	--	-	-	-	-
M587T436_NEG	Carboxyphosphamide	436.005	587.026	2536.39	70.9785	152.288	464.165	48.9002	231.274	797.329	839.228	798.708	Organonitrogen compounds	-	HMDB0060449	C07646	ko00982//Drug metabolism - cytochrome P450	Xenobiotics biodegradation and metabolism	Metabolism
M481T94_NEG	Catalposide	94.327	481.136	9070.29	21274.4	25747.6	268771	101215	73584.6	118888	93511.2	101004	--	--	--	-	-	-	-
M445T439_NEG	Cdp-ethanolamine	438.577	445.051	48327.3	1600.17	4412.61	8188.23	2502.1	3106.54	18858.5	18324.1	18323.9	Pyrimidine nucleotides	3036-18-8	HMDB0001564	C00570	ko01100//Metabolic pathways;ko00564//Glycerophospholipid metabolism	Global and overview maps;Lipid metabolism	Metabolism
M405T50_NEG	Celastrol	49.7745	405.299	23140.5	96274.4	179271	137613	91239.5	109570	78592.5	78593.8	77131.2	Prenol lipids	34157-83-0	HMDB0002385	-	-	-	-
M391T36_NEG	Chenodeoxycholate	35.822	391.282	95531.3	182184	150438	208244	190745	173009	175940	187188	175890	Steroids and steroid derivatives	474-25-9	HMDB0000518	C02528	ko01100//Metabolic pathways;ko04976//Bile secretion;ko00120//Primary bile acid biosynthesis	Digestive system;Global and overview maps;Lipid metabolism	Metabolism;Organismal Systems
M567T173_NEG	Chenodeoxycholic acid 24-acyl-.beta.-d-glucuronide	172.899	567.297	8880.29	129526	32973	33189.7	30262	32337.7	23567.1	25975.7	25842.1	--	--	--	-	-	-	-
M383T194_NEG	Cholestenone	193.826	383.326	1067.87	53651.2	15563.1	629.097	3810.46	700.063	7654.48	7223.01	7219.84	Steroids and steroid derivatives	601-57-0	HMDB0000921	C00599	ko01120//Microbial metabolism in diverse environments	Global and overview maps	Metabolism
M465T25_2_NEG	Cholesteryl sulfate	24.73	465.304	3.33123e+06	9.64664e+07	2.4888e+07	3.9334e+06	3.19485e+06	2.68723e+06	1.22077e+07	1.33794e+07	1.41691e+07	Steroids and steroid derivatives	1256-86-6	HMDB0000653	C18043	ko00140//Steroid hormone biosynthesis	Lipid metabolism	Metabolism
M389T114_NEG	Cholic acid	114.475	389.269	1.03841e+06	3.23064e+06	5.16068e+06	1.69342e+07	1.11539e+07	1.24262e+07	5.18066e+06	5.65934e+06	5.14722e+06	Steroids and steroid derivatives	81-25-4	HMDB0000619	C00695	ko01100//Metabolic pathways;ko04976//Bile secretion;ko00120//Primary bile acid biosynthesis	Digestive system;Global and overview maps;Lipid metabolism	Metabolism;Organismal Systems
M293T25_3_NEG	Cinchonine	24.693	293.178	263854	160763	94851	408998	291666	247358	279557	283323	287842	--	--	--	-	-	-	-
M327T37_NEG	Cis-4,7,10,13,16,19-docosahexaenoic acid	36.972	327.231	376225	14047	41152.4	29278.2	57170.6	49844.6	173452	173534	161934	--	--	--	C06429	ko01040//Biosynthesis of unsaturated fatty acids	Lipid metabolism	Metabolism
M331T135_NEG	Cis-7,10,13,16-docosatetraenoic acid	134.587	331.247	11723.9	41443.7	28604	37496.5	33830.4	41387	46801.3	46511.1	46764.6	--	--	--	C16527	ko01040//Biosynthesis of unsaturated fatty acids	Lipid metabolism	Metabolism
M253T46_2_NEG	Cis-9-palmitoleic acid	46.338	253.217	846321	356465	226104	729363	1.47362e+06	1.14515e+06	850012	931356	850551	Fatty Acyls	373-49-9	HMDB0003229	C08362	ko00061//Fatty acid biosynthesis	Lipid metabolism	Metabolism
M141T347_2_NEG	Cis,cis-muconic acid	347.403	141.017	6.69351e+06	6.40985e+06	9.34236e+06	1.20428e+07	1.25919e+07	1.36349e+07	1.16608e+07	1.14953e+07	1.1661e+07	Fatty Acyls	1119-72-8	HMDB0006331	C02480	ko01100//Metabolic pathways;ko01120//Microbial metabolism in diverse environments;ko01220//Degradation of aromatic compounds	Global and overview maps	Metabolism
M191T492_NEG	Citrate	491.633	191.02	8.51151e+06	5.3331e+06	8.8016e+06	1.26558e+07	9.99321e+06	1.71909e+07	5.0915e+06	5.40616e+06	5.09247e+06	Carboxylic acids and derivatives	77-92-9	HMDB0000094	C00158	ko01100//Metabolic pathways;ko01110//Biosynthesis of secondary metabolites;ko01120//Microbial metabolism in diverse environments;ko01130//Biosynthesis of antibiotics;ko01230//Biosynthesis of amino acids;ko04742//Taste transduction;ko01210//2-Oxocarboxylic acid metabolism;ko05230//Central carbon metabolism in cancer;ko01200//Carbon metabolism;ko00250//Alanine, aspartate and glutamate metabolism;ko…	Amino acid metabolism;Cancers;Carbohydrate metabolism;Endocrine system;Global and overview maps;Sensory system	Human Diseases;Metabolism;Organismal Systems
M154T46_NEG	Citrazinic acid	45.529	154.014	32185.1	45812.2	75629.4	90620.8	83843.1	99815.3	73466.6	73486.9	72175.5	--	--	--	-	-	-	-
M345T309_NEG	Corticosterone	308.68	345.226	2338.42	8543.44	5636.28	11499.7	16398.8	14636.4	10553.8	9914.48	10552.9	Steroids and steroid derivatives	50-22-6	HMDB0001547	C02140	ko01100//Metabolic pathways;ko00140//Steroid hormone biosynthesis;ko04923//Regulation of lipolysis in adipocyte;ko04925//Aldosterone synthesis and secretion;ko05020//Prion diseases	Endocrine system;Global and overview maps;Lipid metabolism;Neurodegenerative diseases	Human Diseases;Metabolism;Organismal Systems
M367T272_NEG	Curcumin	272.164	367.103	126358	5272.53	10055	24146.7	33643.1	59634.7	45672.6	42086.4	42165.4	Diarylheptanoids	458-37-7	HMDB0002269	C10443	ko01110//Biosynthesis of secondary metabolites	Global and overview maps	Metabolism
M150T657_NEG	Cyanuric acid	657.134	149.994	198119	192127	189711	122680	194899	177223	188643	188640	190019	Triazines	108-80-5	HMDB0041861	C06554	ko01100//Metabolic pathways;ko01120//Microbial metabolism in diverse environments	Global and overview maps	Metabolism
M304T315_NEG	Cytidine 2',3'-cyclic phosphate	314.8	304.032	251.614	224.914	426.098	2660.98	1262.39	922.947	1471.63	1475.43	1381.08	Pyrimidine nucleotides	15718-51-1	HMDB0011691	C02354	ko00240//Pyrimidine metabolism	Nucleotide metabolism	Metabolism
M613T432_NEG	Cytidine monophosphate n-acetylneuraminic acid	431.822	613.138	19735.2	695.499	1314.99	2525.03	5113.57	7544.29	9080.65	8975.22	8978.55	Pyrimidine nucleotides	2022-12-08	HMDB0001176	C00128	ko01100//Metabolic pathways;ko00520//Amino sugar and nucleotide sugar metabolism	Carbohydrate metabolism;Global and overview maps	Metabolism
M165T439_NEG	D-arabinonic acid	438.816	165.019	24281.4	18008.9	23514.9	21705.8	14980.3	36272.5	25260.1	25240.2	23354.2	--	--	--	-	-	-	-
M207T298_NEG	D-Arabinono-1,4-lactone	297.753	207.05	1839.27	4622.92	3818.04	7962.43	7176.04	7569.65	7186.56	6259.65	7207.06	--	--	--	-	-	-	-
M132T453_NEG	D-Aspartic acid	453.197	132.03	84407.7	12502.5	20247.3	14059.4	15380.7	37926.4	70157.7	70152.3	68912.6	Carboxylic acids and derivatives	1783-96-6	HMDB0006483	C00402	ko00250//Alanine, aspartate and glutamate metabolism	Amino acid metabolism	Metabolism
M265T276_NEG	D-Biotin	275.736	265.057	704.826	1020.28	1218.32	883.604	966.932	791.971	511.893	519.016	616.321	Biotin and derivatives	58-85-5	HMDB0000030	C00120	ko01100//Metabolic pathways;ko02010//ABC transporters;ko04977//Vitamin digestion and absorption;ko00780//Biotin metabolism	Digestive system;Global and overview maps;Membrane transport;Metabolism of cofactors and vitamins	Environmental Information Processing;Metabolism;Organismal Systems
M199T253_NEG	D-erythrose 4-phosphate	252.656	198.991	1124.74	8368.23	55013.6	6325.01	7537.49	6844.55	4810.19	4950.44	4577.88	Organooxygen compounds	585-18-2	HMDB0001321	C00279	ko01100//Metabolic pathways;ko01110//Biosynthesis of secondary metabolites;ko01120//Microbial metabolism in diverse environments;ko01130//Biosynthesis of antibiotics;ko01230//Biosynthesis of amino acids;ko01200//Carbon metabolism;ko00030//Pentose phosphate pathway;ko00400//Phenylalanine, tyrosine and tryptophan biosynthesis;ko00750//Vitamin B6 metabolism	Amino acid metabolism;Carbohydrate metabolism;Global and overview maps;Metabolism of cofactors and vitamins	Metabolism
M259T212_1_NEG	D-fructose 6-phosphate	212.332	259.011	2360.84	1479.11	6230.19	19935.4	14458.4	16772.2	15029.5	15053	17360.6	Organooxygen compounds	643-13-0	HMDB0000124	C00085	ko01100//Metabolic pathways;ko01120//Microbial metabolism in diverse environments;ko05230//Central carbon metabolism in cancer;ko01200//Carbon metabolism;ko00052//Galactose metabolism;ko00500//Starch and sucrose metabolism;ko04152//AMPK signaling pathway;ko04931//Insulin resistance;ko04922//Glucagon signaling pathway	Cancers;Carbohydrate metabolism;Endocrine and metabolic diseases;Endocrine system;Global and overview maps;Signal transduction	Environmental Information Processing;Human Diseases;Metabolism;Organismal Systems
M191T281_NEG	D-Galactarate	281.486	191.019	93322.1	9866.79	28344.2	15500.8	36617.7	53911	90526	86889.9	86555.6	--	--	--	C00879	ko00053//Ascorbate and aldarate metabolism	Carbohydrate metabolism	Metabolism
M193T414_NEG	D-galacturonic acid	413.982	193.035	10239.9	8120.47	12896.5	101593	64657.4	72144.9	24995	39738.5	39776	Organooxygen compounds	14982-50-4	HMDB0002545	C00333	ko01100//Metabolic pathways;ko02010//ABC transporters;ko00520//Amino sugar and nucleotide sugar metabolism;ko00053//Ascorbate and aldarate metabolism;ko00040//Pentose and glucuronate interconversions	Carbohydrate metabolism;Global and overview maps;Membrane transport	Environmental Information Processing;Metabolism
M419T173_NEG	D-glucarate	173.437	419.062	31624	12959.8	22942.5	23342.1	23443.3	26865	20438	20596.8	20438.3	Organooxygen compounds	25525-21-7	HMDB0000663	C00818	ko01100//Metabolic pathways;ko00053//Ascorbate and aldarate metabolism	Carbohydrate metabolism;Global and overview maps	Metabolism
M195T413_NEG	D-gluconate	412.656	195.05	42072.1	19807.7	22760.3	151088	140066	132259	77508.4	84931.4	84869.9	Organooxygen compounds	526-95-4	HMDB0000625	C00257	ko01100//Metabolic pathways;ko01110//Biosynthesis of secondary metabolites;ko01120//Microbial metabolism in diverse environments;ko01130//Biosynthesis of antibiotics;ko01200//Carbon metabolism;ko00030//Pentose phosphate pathway	Carbohydrate metabolism;Global and overview maps	Metabolism
M517T46_NEG	D-glucosamine 1-phosphate	46.338	517.102	2288.64	6691.69	22064.5	43664.9	29151.1	51944.8	25379.2	24922.9	24921.4	Organooxygen compounds	6866-69-9	HMDB0001367	C06156	ko01100//Metabolic pathways;ko01130//Biosynthesis of antibiotics;ko00520//Amino sugar and nucleotide sugar metabolism;ko04931//Insulin resistance	Carbohydrate metabolism;Endocrine and metabolic diseases;Global and overview maps	Human Diseases;Metabolism
M258T460_NEG	D-glucosamine 6-phosphate	460.475	258.038	13247.1	1765.82	2068.03	1695.83	2224.84	2228.36	6661.51	7573.09	7572.83	Organooxygen compounds	3616-42-0	HMDB0001254	C00352	ko01100//Metabolic pathways;ko01130//Biosynthesis of antibiotics;ko00520//Amino sugar and nucleotide sugar metabolism;ko00250//Alanine, aspartate and glutamate metabolism;ko04931//Insulin resistance	Amino acid metabolism;Carbohydrate metabolism;Endocrine and metabolic diseases;Global and overview maps	Human Diseases;Metabolism
M241T111_NEG	D-glucose 6-phosphate	110.736	241.001	6097.18	8830.66	132529	786934	595103	470599	321436	448080	446945	Organooxygen compounds	56-73-5	HMDB0001401	C00092	ko01100//Metabolic pathways;ko01130//Biosynthesis of antibiotics;ko05230//Central carbon metabolism in cancer;ko00500//Starch and sucrose metabolism;ko04918//Thyroid hormone synthesis;ko04931//Insulin resistance;ko04973//Carbohydrate digestion and absorption;ko00524//Neomycin, kanamycin and gentamicin biosynthesis;ko04911//Insulin secretion;ko04917//Prolactin signaling pathway;ko00562//Inositol p…	Biosynthesis of other secondary metabolites;Cancers;Carbohydrate metabolism;Digestive system;Endocrine and metabolic diseases;Endocrine system;Global and overview maps	Human Diseases;Metabolism;Organismal Systems
M149T33_NEG	D-lyxose	32.5665	149.06	8276.34	11740.2	17628.2	14463.7	20908.8	24872.8	32823	32826.3	33771	Organooxygen compounds	9000-69-5	HMDB0003402	C00476	ko00040//Pentose and glucuronate interconversions	Carbohydrate metabolism	Metabolism
M341T388_NEG	D-Maltose	388.219	341.107	6331.16	30739.4	37382.6	115587	115242	116338	90333.9	87358.7	87366.1	Organooxygen compounds	69-79-4	HMDB0000163	C00208	ko01100//Metabolic pathways;ko02010//ABC transporters;ko04742//Taste transduction;ko00500//Starch and sucrose metabolism;ko04973//Carbohydrate digestion and absorption	Carbohydrate metabolism;Digestive system;Global and overview maps;Membrane transport;Sensory system	Environmental Information Processing;Metabolism;Organismal Systems
M181T334_NEG	D-mannitol	333.647	181.048	29563.9	55995.3	34878.2	54448.2	60329.9	92689.7	10716.3	10656.6	11845.2	Organooxygen compounds	69-65-8	HMDB0000765	C00392	ko02010//ABC transporters;ko00051//Fructose and mannose metabolism	Carbohydrate metabolism;Membrane transport	Environmental Information Processing;Metabolism
M239T388_NEG	D-Mannose	388.14	239.076	936217	44690.2	128813	181062	308255	354875	494740	495699	491045	Organooxygen compounds	3458-28-4	HMDB0000169	C00159	ko01100//Metabolic pathways;ko02010//ABC transporters;ko00520//Amino sugar and nucleotide sugar metabolism;ko00052//Galactose metabolism;ko00051//Fructose and mannose metabolism;ko04142//Lysosome	Carbohydrate metabolism;Global and overview maps;Membrane transport;Transport and catabolism	Cellular Processes;Environmental Information Processing;Metabolism
M259T466_NEG	D-mannose 6-phosphate	466.159	259.022	784176	15932.7	19055.4	5175.86	11433.8	31867.9	142564	113185	113427	Organooxygen compounds	3672-15-9	HMDB0001078	C00275	ko01100//Metabolic pathways;ko01110//Biosynthesis of secondary metabolites;ko01130//Biosynthesis of antibiotics;ko00520//Amino sugar and nucleotide sugar metabolism;ko00051//Fructose and mannose metabolism;ko04142//Lysosome	Carbohydrate metabolism;Global and overview maps;Transport and catabolism	Cellular Processes;Metabolism
M114T313_NEG	D-proline	312.874	114.055	288424	24454.8	54926.3	16095.7	54253.6	63352.3	87933.3	87553.2	82818.2	Carboxylic acids and derivatives	344-25-2	HMDB0003411	C00763	ko01100//Metabolic pathways;ko00330//Arginine and proline metabolism	Amino acid metabolism;Global and overview maps	Metabolism
M179T349_NEG	D-psicose	349.079	179.034	3247.35	10420.7	29450.3	16593.2	5775.46	36578.1	12403	12341.6	12403.4	--	--	--	-	-	-	-
M229T476_NEG	D-ribose 1-phosphate	476.083	229.035	8525.46	1213.71	2029.42	11756.8	12535.2	16961	17381.9	17023.3	17381.8	Organooxygen compounds	14075-00-4	HMDB0001489	C00620	ko00230//Purine metabolism;ko00030//Pentose phosphate pathway	Carbohydrate metabolism;Nucleotide metabolism	Metabolism
M289T250_NEG	D-Ribose 5-phosphate	250.208	289.037	17168	1057.23	2309.94	14071.4	9023.97	7949.83	13684.3	14152.5	14152.3	Organooxygen compounds	3615-55-2	HMDB0001548	C00117	ko01100//Metabolic pathways;ko01110//Biosynthesis of secondary metabolites;ko01120//Microbial metabolism in diverse environments;ko01130//Biosynthesis of antibiotics;ko01230//Biosynthesis of amino acids;ko00230//Purine metabolism;ko01200//Carbon metabolism;ko00030//Pentose phosphate pathway;ko04918//Thyroid hormone synthesis	Carbohydrate metabolism;Endocrine system;Global and overview maps;Nucleotide metabolism	Metabolism;Organismal Systems
M229T89_NEG	D-ribulose 5-phosphate	88.51	229.001	18182.3	38585.4	86438.8	287564	308286	353689	226721	227000	225432	Carbohydrates and carbohydrate conjugates	4151-19-3	HMDB0000618	C00199	ko01100//Metabolic pathways;ko01110//Biosynthesis of secondary metabolites;ko01120//Microbial metabolism in diverse environments;ko01130//Biosynthesis of antibiotics;ko01230//Biosynthesis of amino acids;ko01200//Carbon metabolism;ko00030//Pentose phosphate pathway;ko00040//Pentose and glucuronate interconversions;ko00740//Riboflavin metabolism;ko00750//Vitamin B6 metabolism	Carbohydrate metabolism;Global and overview maps;Metabolism of cofactors and vitamins	Metabolism
M149T150_NEG	D-xylose	149.883	149.045	12170	17859.1	52322.6	4362.62	10545.4	5965.22	16475.6	15473.9	15505.7	Organooxygen compounds	58-86-6	HMDB0000098	C00181	ko01100//Metabolic pathways;ko02010//ABC transporters;ko00520//Amino sugar and nucleotide sugar metabolism;ko00040//Pentose and glucuronate interconversions	Carbohydrate metabolism;Global and overview maps;Membrane transport	Environmental Information Processing;Metabolism
M125T387_NEG	D(-)-beta-hydroxy butyric acid	387.463	125.024	29373.7	3730.25	6198.64	10583.5	19780.6	22071.5	22049.4	21754.9	21787.7	--	--	--	-	-	-	-
M451T247_NEG	Daidzin	247.112	451.088	106754	3053.68	3748.8	5335.63	3898.57	4017.88	4700.74	4974.64	4974.91	Isoflavonoids	552-66-9	HMDB0033991	-	-	-	-
M379T149_NEG	Daunorubicin	149.166	379.068	8230.18	3746.89	37288.2	426111	184677	401685	265834	268791	265919	Anthracyclines	20830-81-3	HMDB0014832	C01907	ko01130//Biosynthesis of antibiotics	Global and overview maps	Metabolism
M637T172_NEG	Decahydrogambogic acid	171.645	637.393	6625.23	19092.1	23010.4	28663.2	26458.4	30132.1	21608.8	21679.7	20351.9	--	--	--	-	-	-	-
M129T235_NEG	Dehydro-l-(+)-ascorbic acid dimer	234.517	129.018	116299	3563.02	5409.14	3965	4932.17	8553.73	18386.4	18729.1	18385.4	--	--	--	-	-	-	-
M173T122_NEG	Dehydroascorbic acid	122.037	173.008	251407	23254.2	17648.1	25571.5	25112	27354.8	22737.6	22837.1	22836.7	Lactones	490-83-5	HMDB0001264	C05422	ko01100//Metabolic pathways;ko00053//Ascorbate and aldarate metabolism;ko00480//Glutathione metabolism	Carbohydrate metabolism;Global and overview maps;Metabolism of other amino acids	Metabolism
M483T34_NEG	Dehydrotumulosic acid	33.916	483.345	26430.8	23871	16988.2	47619.5	244012	27499.9	51570.6	54493.8	51653.5	--	--	--	-	-	-	-
M259T355_NEG	Demethylbellidifolin	355.366	259.012	86577.8	5636.87	9637.8	51522	95340	143934	85441.2	85431.5	83244.2	--	--	--	-	-	-	-
M391T149_2_NEG	Deoxycholic acid	148.542	391.285	7.59088e+06	1.13937e+07	1.82093e+07	1.14673e+08	8.66209e+07	8.97818e+07	7.51369e+07	7.51337e+07	7.40269e+07	Steroids and steroid derivatives	83-44-3	HMDB0000626	C04483	ko04976//Bile secretion	Digestive system	Organismal Systems
M266T222_NEG	Deoxyguanosine	221.505	266.089	2790.52	9763.7	9280.85	4776.55	6732.25	7164.96	7515.71	7517.9	7433.86	Purine nucleosides	961-07-9	HMDB0000085	C00330	ko01100//Metabolic pathways;ko00230//Purine metabolism	Global and overview maps;Nucleotide metabolism	Metabolism
M251T174_NEG	Deoxyinosine	173.561	251.077	25275.9	111960	212746	62061.2	95178.1	100702	129874	129054	129056	Purine nucleosides	890-38-0	HMDB0000071	C05512	ko01100//Metabolic pathways;ko00230//Purine metabolism	Global and overview maps;Nucleotide metabolism	Metabolism
M321T405_NEG	Deoxythymidine 5'-phosphate (dTMP)	405.297	321.046	797.931	1039.41	844.699	2213.11	1769.17	2243.46	3003.33	2764.05	2748.57	--	--	--	C00364	ko01100//Metabolic pathways;ko00240//Pyrimidine metabolism	Global and overview maps;Nucleotide metabolism	Metabolism
M585T239_NEG	Desferrioxamine d2	238.97	585.301	9954.7	1916.97	4670	2738.45	3352.51	6101.75	5741.85	5951.71	5736.65	--	--	--	-	-	-	-
M352T297_NEG	Desmethyleneparoxetine	296.595	352.119	14761.8	9835.65	2650.69	5817.76	8131.27	9647.22	8612.98	6064.3	6788.66	--	--	--	-	-	-	-
M439T144_NEG	Desmethylverapamil	144.217	439.244	9961.93	183283	642722	159699	85696.7	78349.3	104824	104865	107212	--	--	--	-	-	-	-
M385T210_NEG	Dexanabinol	209.864	385.294	452.67	29957.9	50334.4	14553.1	5975.89	7037.98	13158.8	14263.7	13352	--	--	--	-	-	-	-
M309T209_NEG	Diflubenzuron	209.164	309.043	5235.38	632.076	779.981	874.965	1435.83	1151.94	1733.12	1733.18	1755.4	Benzene and substituted derivatives	35367-38-5	HMDB0031778	-	-	-	-
M305T68_NEG	Dihomo-gamma-Linolenic Acid	67.706	305.248	51433.3	53252.9	24825.2	20364.5	24070.9	29074.4	24123.2	18669.4	31434.9	Fatty Acyls	1783-84-2	HMDB0002925	C03242	ko01100//Metabolic pathways;ko00591//Linoleic acid metabolism;ko01040//Biosynthesis of unsaturated fatty acids	Global and overview maps;Lipid metabolism	Metabolism
M127T388_NEG	Dihydro-4,4-dimethyl-2,3-furandione	388.428	127.051	51195	4011.53	6866.1	7189.74	10416.7	13922.3	26926.8	28765.6	29217.4	--	--	--	-	-	-	-
M165T355_NEG	Dihydrothymine	355.295	165.005	32679.6	52767.4	44943.1	53756.4	10262.5	4220.51	34194.7	23095.8	34398.2	Diazines	696-04-8	HMDB0000079	-	-	-	-
M111T523_NEG	Dihydroxyacetone	523.091	111.008	92448.7	43449.2	176045	58516.4	57072.8	151026	29690.3	29984.3	33419.1	Organooxygen compounds	96-26-4	HMDB0001882	C00184	ko01100//Metabolic pathways;ko01120//Microbial metabolism in diverse environments;ko01200//Carbon metabolism;ko00561//Glycerolipid metabolism	Global and overview maps;Lipid metabolism	Metabolism
M129T160_NEG	Dihydroxyfumarate	159.665	129.055	18389.3	35901.8	44993.9	34249.7	12204.3	73676.6	44608.2	43768	44620.7	Keto acids and derivatives	133-38-0	HMDB0002050	C00975	ko00630//Glyoxylate and dicarboxylate metabolism	Carbohydrate metabolism	Metabolism
M527T27_2_NEG	Dinor-12-oxophytodienoic acid	27.46	527.335	62661.6	103789	232957	275352	239509	232647	232114	226913	232030	--	--	--	-	-	-	-
M607T194_NEG	Diosmin	193.503	607.165	17585	2484.33	6408.01	14030	8769.87	18276.7	10176.6	10238.4	10544.5	Flavonoids	520-27-4	HMDB0029548	-	-	-	-
M116T279_NEG	Dl-homocysteine	279.154	116.035	7907.56	781.499	1183.82	1485.38	2034.16	3110.73	4290.26	4264.53	4264.25	Carboxylic acids and derivatives	454-29-5	HMDB0000742	C00155	ko01100//Metabolic pathways;ko01110//Biosynthesis of secondary metabolites;ko01230//Biosynthesis of amino acids;ko00270//Cysteine and methionine metabolism;ko00920//Sulfur metabolism;ko04621//NOD-like receptor signaling pathway	Amino acid metabolism;Energy metabolism;Global and overview maps;Immune system	Metabolism;Organismal Systems
M89T223_2_NEG	Dl-lactate	223.232	89.0246	1.47669e+06	47545.9	127030	375012	527635	543033	797531	797561	794413	--	--	--	-	-	-	-
M333T33_3_NEG	Docosatrienoic acid	32.933	333.278	125070	103433	138163	100522	92238.3	93343.6	129511	129878	121687	Fatty Acyls	28845-86-5	HMDB0002823	-	-	-	-
M199T17_NEG	Dodecanoic acid	17.3595	199.169	10901	710.547	10730.1	10748.8	11259.6	12326.4	10158.1	10534.9	10527.3	Steroids and steroid derivatives	1908-11-08	HMDB0002262	C02679	ko01100//Metabolic pathways;ko01130//Biosynthesis of antibiotics;ko00061//Fatty acid biosynthesis	Global and overview maps;Lipid metabolism	Metabolism
M391T32_2_NEG	Dodecanoic acid, 12-[[(tricyclo[3.3.1.13,7]dec-1-ylamino)carbonyl]amino]-	32.282	391.319	53615.6	38295.8	62182.5	154147	164048	120042	119181	134016	118891	--	--	--	-	-	-	-
M197T285_NEG	Dodecylbenzenesulfonic acid	285.005	197.045	1685.02	1769.7	3236.71	18769.5	14807.5	18737.1	15089.1	14733.8	15101.6	--	--	--	-	-	-	-
M450T37_NEG	Doxazosin	36.938	450.189	3557.62	12916.2	29484	44215	29514.2	27057.9	35190.3	32606.7	32559.9	Diazinanes	74191-85-8	HMDB0014728	-	-	-	-
M555T147_NEG	Dronedarone	146.579	555.27	77911.2	13428	7720.21	36029.5	35754.8	38442.4	27376.1	30250.2	28984.7	--	--	--	-	-	-	-
M471T38_NEG	Echinocystic acid	37.5555	471.346	58494.5	3.12533e+06	444482	498482	456824	425942	720120	720184	708836	--	--	--	-	-	-	-
M633T166_NEG	Echinocystic acid 3-glucoside	165.756	633.398	4589.35	26381.4	8381.68	24742.7	32141.9	40950.7	37142.2	36325.6	37137.2	--	--	--	-	-	-	-
M291T472_NEG	EDTA	472.047	291.082	12589.3	926.653	1053.39	1322.16	1279.27	1259.11	1368.47	1363.23	1191.05	Carboxylic acids and derivatives	62-33-9	HMDB0015109	-	-	-	-
M309T38_NEG	Eicosenoic acid	37.9	309.278	541784	1.12833e+06	594911	220984	185581	205595	374639	374636	372059	--	--	--	C16526	ko01040//Biosynthesis of unsaturated fatty acids	Lipid metabolism	Metabolism
M403T145_NEG	Enalaprilat tert-butyl ester	145.111	403.246	16855.4	148203	231743	47868.5	71727.4	86737.1	67412.6	65855.2	70522.5	--	--	--	-	-	-	-
M495T28_1_NEG	Enterostatin human	27.594	495.276	62925.6	353282	187589	99331.7	85428.3	139012	334553	334452	338937	--	--	--	-	-	-	-
M169T492_NEG	Epigallocatechin gallate	491.994	168.999	2589.71	3050.45	3062.63	3235.38	1973.4	829.99	8519.65	8405.57	10483.6	Flavonoids	989-51-5	HMDB0003153	C09731	ko04152//AMPK signaling pathway	Signal transduction	Environmental Information Processing
M395T100_NEG	Estradiol Cypionate	99.784	395.254	12095.1	45776.6	40434.3	22052.3	37659.1	26098.3	19233.9	19267.3	16697.7	--	--	--	-	-	-	-
M463T92_NEG	Estriol 16alpha-(beta-d-glucuronide)	91.805	463.209	4500.63	136184	7504.33	28202.8	22760.4	26905.4	20715.6	22462.6	22503.5	--	--	--	C05504	ko00140//Steroid hormone biosynthesis	Lipid metabolism	Metabolism
M349T387_NEG	Estrone sulfate	387.376	349.093	10030	3469.77	3467.6	3185.48	11103.8	8822.43	11942.2	11941.6	11787.8	Steroids and steroid derivatives	481-97-0	HMDB0001425	C02538	ko04976//Bile secretion;ko00140//Steroid hormone biosynthesis	Digestive system;Lipid metabolism	Metabolism;Organismal Systems
M281T364_NEG	Ethyl glucuronide	364.178	281.086	2336.16	2312.36	6286.84	26845.9	19560	27721	19272.5	19413.9	19216.1	Organooxygen compounds	-	HMDB0131286	-	-	-	-
M587T252_NEG	Etoposide	251.929	587.155	1485.68	1496.35	1851.91	864.917	949.193	1393.74	1091.63	1081.31	1201.5	Lignan lactones	33419-42-0	HMDB0014911	C01576	ko04976//Bile secretion	Digestive system	Organismal Systems
M561T36_NEG	Fahfa 36:2	36.145	561.486	18647.1	2638.46	3583.61	29284	30312.6	15797.4	17115.6	15899.9	17133.5	--	--	--	-	-	-	-
M259T331_NEG	Falcarindiol	330.844	259.154	1408.94	2782.17	4485.77	3134.63	3250.96	3203.64	2779.2	2663.7	2686.83	Fatty Acyls	55297-87-5	HMDB0033941	-	-	-	-
M686T269_NEG	Ferrichrome	269.495	686.317	84.9897	3954.93	2885.95	3704.87	1277.69	4693.47	1616.73	1614.26	1557.27	--	--	--	C06228	ko02010//ABC transporters	Membrane transport	Environmental Information Processing
M455T285_NEG	Flavin mononucleotide (fmn)	285.34	455.084	13318.7	2938.34	4951.04	5663.12	4052.02	4531.74	4465.27	4415.22	4314.35	--	--	--	C00061	ko01100//Metabolic pathways;ko01110//Biosynthesis of secondary metabolites;ko04977//Vitamin digestion and absorption;ko00190//Oxidative phosphorylation;ko00740//Riboflavin metabolism	Digestive system;Energy metabolism;Global and overview maps;Metabolism of cofactors and vitamins	Metabolism;Organismal Systems
M274T32_1_NEG	Flufenacet ethanesulfonic acid	32.032	274.035	7896.13	11184.7	22811.4	43351	28028.4	49244.9	45081	48664.3	45228.2	--	--	--	-	-	-	-
M164T57_NEG	Formylanthranilic acid	57.396	164.035	30585.6	106239	193152	45243.8	53505.7	82773.2	66450.1	88403.7	88333	Benzene and substituted derivatives	3342-77-6	HMDB0004089	C05653	ko00380//Tryptophan metabolism	Amino acid metabolism	Metabolism
M755T459_NEG	Forsythoside b	459.224	755.252	59985.9	678.467	2034.91	1599.09	7463.03	12439.4	38663.7	37287.6	38704.7	--	--	--	-	-	-	-
M241T24_NEG	Fructose 1-phosphate	24.311	241.016	3945.57	3373.86	5132.2	12902.8	13105.6	13862.4	9090.02	9572.24	9306.5	Organooxygen compounds	15978-08-2	HMDB0001076	C01094	ko01100//Metabolic pathways;ko01120//Microbial metabolism in diverse environments;ko00051//Fructose and mannose metabolism;ko00400//Phenylalanine, tyrosine and tryptophan biosynthesis	Amino acid metabolism;Carbohydrate metabolism;Global and overview maps	Metabolism
M457T205_2_NEG	Fumagillin	205.337	457.224	1424.77	11065	26225.8	13156.2	11595	16531.3	12957.1	12833.8	12669.2	--	--	--	-	-	-	-
M689T58_NEG	Fumonisin la4	57.791	689.392	2879.46	28420	29447	29958.3	18798.4	19230	15807.6	15709.3	15807.3	--	--	--	-	-	-	-
M283T89_NEG	Furopinnarin	89.202	283.096	16569.3	83580.3	81910.7	65976.3	61356.3	68016.5	63736.1	63766.3	65863.6	--	--	--	-	-	-	-
M287T99_NEG	Fustin	98.5505	287.043	6500.83	15338.6	53393.4	33780.8	131647	53544.4	51406.6	63261.9	63050.4	--	--	--	-	-	-	-
M469T231_NEG	G(8-o-4)fa sulfate	231.18	469.078	21378.4	1715.57	2183.66	11338	4412.51	8967.56	6922.96	6460.33	6459.29	--	--	--	-	-	-	-
M847T475_NEG	G1f[1,6]	474.934	847.255	25292.5	560.656	698.1	581.227	1463.64	870.338	6153.41	6082.71	6152.77	--	--	--	-	-	-	-
M401T294_NEG	Galactinol	293.634	401.129	5007.13	1408.74	2469.51	7146.75	7521.88	7982.42	3627.42	4439.98	3707.38	Organooxygen compounds	-	HMDB0005826	C01235	ko00052//Galactose metabolism	Carbohydrate metabolism	Metabolism
M195T447_NEG	Galactonic acid	446.933	195.05	40762	24234.5	34102.4	135224	104737	108229	64484.8	61136.9	61267.8	Hydroxy acids and derivatives	13382-27-9	HMDB0000565	C00880	ko01100//Metabolic pathways;ko01120//Microbial metabolism in diverse environments;ko00052//Galactose metabolism	Carbohydrate metabolism;Global and overview maps	Metabolism
M497T37_NEG	Ganoderic acid a	36.917	497.287	17863.7	93005.9	172690	145019	147605	123908	196496	186555	196574	Prenol lipids	81907-62-2	HMDB0034931	-	-	-	-
M413T58_NEG	Garcinone c	58.442	413.146	7354.39	20672	28181.3	105350	35083.8	47206	39537.4	38949.6	38950.8	Benzopyrans	76996-27-5	HMDB0029511	-	-	-	-
M401T391_NEG	Gentiopicroside	390.932	401.128	1448.22	12127.4	5853.32	12835.7	16300.2	16945.7	16938.4	16938.3	16366.8	--	--	--	C09782	ko01110//Biosynthesis of secondary metabolites	Global and overview maps	Metabolism
M345T61_NEG	Ginkgolic acid i	61.4665	345.242	37072.9	54160.5	72814.8	47882.6	45164.9	45588.6	40165.2	44008.2	44212	--	--	--	-	-	-	-
M829T188_NEG	Ginsenoside f2	187.78	829.486	8938.01	4974.59	9136.51	4409.31	4368.73	3360.16	4143.04	4143.77	3766.48	Prenol lipids	62025-49-4	HMDB0039545	-	-	-	-
M815T35_NEG	Ginsenoside f3	34.9925	815.492	112466	14160.9	25295.5	157465	89995.2	114177	70087.8	64939.7	70052.7	Prenol lipids	62025-50-7	HMDB0039556	-	-	-	-
M274T409_NEG	Gln-glu	409.492	274.102	3154.94	1633.95	6868.9	1378.41	1458.93	1496.99	2022.11	2116.95	2020.62	Carboxylic acids and derivatives	88830-90-4	HMDB0028796	-	-	-	-
M332T455_NEG	Glu-Gly-Glu	455.131	332.108	13473.1	1900.81	902.445	2282.48	808.859	949.882	4650.25	4637.78	3704.71	--	--	--	-	-	-	-
M422T465_NEG	Glucoiberin	464.54	422.021	37027.2	315.321	757.062	732.896	927.464	947.552	3782.73	3977.11	3836.86	Organooxygen compounds	554-88-1	HMDB0038406	-	-	-	-
M241T393_NEG	Glucose 1-phosphate	392.907	241.011	4501.57	1299.38	6938.23	14349.7	16485.5	14410.6	13565.8	13834.1	13565.3	Organooxygen compounds	59-56-3	HMDB0001586	C00103	ko01100//Metabolic pathways;ko01110//Biosynthesis of secondary metabolites;ko01120//Microbial metabolism in diverse environments;ko01130//Biosynthesis of antibiotics;ko00520//Amino sugar and nucleotide sugar metabolism;ko00052//Galactose metabolism;ko00500//Starch and sucrose metabolism;ko00040//Pentose and glucuronate interconversions;ko04922//Glucagon signaling pathway;ko00010//Glycolysis / Glu…	Carbohydrate metabolism;Endocrine system;Global and overview maps;Metabolism of terpenoids and polyketides	Metabolism;Organismal Systems
M129T59_NEG	Glutaconic acid	58.532	129.019	81440.8	70803	121180	76076.9	48985	156228	91491.6	89142.6	89091.9	Carboxylic acids and derivatives	1724-02-3	HMDB0000620	-	-	-	-
M146T392_NEG	Glutamic acid	392.376	146.046	6.93672e+06	407769	772464	390171	625247	773869	2.25733e+06	2.25614e+06	2.19491e+06	Carboxylic acids and derivatives	-	HMDB0060475	C00025	ko01100//Metabolic pathways;ko01110//Biosynthesis of secondary metabolites;ko01120//Microbial metabolism in diverse environments;ko01130//Biosynthesis of antibiotics;ko02010//ABC transporters;ko01230//Biosynthesis of amino acids;ko04080//Neuroactive ligand-receptor interaction;ko04742//Taste transduction;ko01210//2-Oxocarboxylic acid metabolism;ko05230//Central carbon metabolism in cancer;ko00330…	Amino acid metabolism;Biosynthesis of other secondary metabolites;Cancers;Carbohydrate metabolism;Cellular community - eukaryotes;Digestive system;Energy metabolism;Environmental adaptation;Excretory system;Global and overview maps;Membrane transport;Metabolism of cofactors and vitamins;Metabolism of other amino acids;Nervous system;Neurodegenerative diseases;Sensory system;Signal transduction;Si…	Cellular Processes;Environmental Information Processing;Genetic Information Processing;Human Diseases;Metabolism;Organismal Systems
M145T388_NEG	Glutamine	387.981	145.061	316746	21904.4	41229.3	50477.2	64525.3	125841	152331	159922	151090	Carboxylic acids and derivatives	5959-95-5	HMDB0003423	-	-	-	-
M113T306_NEG	Glutaric acid	306.265	113.024	23573.5	3855.66	7041.83	14304.1	33608.8	31059.6	14862.7	12836.8	12595.1	Carboxylic acids and derivatives	110-94-1	HMDB0000661	C00489	ko01120//Microbial metabolism in diverse environments;ko00310//Lysine degradation;ko00071//Fatty acid degradation	Amino acid metabolism;Global and overview maps;Lipid metabolism	Metabolism
M611T485_NEG	Glutathione, oxidized	484.652	611.144	1.05353e+06	93889.7	178402	30395.2	75579.9	55053.2	165467	165916	164141	--	--	--	C00127	ko00480//Glutathione metabolism;ko04918//Thyroid hormone synthesis	Endocrine system;Metabolism of other amino acids	Metabolism;Organismal Systems
M211T371_NEG	Gly-His	370.735	211.083	2534.37	980.498	1621.46	210.816	1553.94	2022.41	2126.03	2066.44	2126.21	Carboxylic acids and derivatives	-	HMDB0028843	-	-	-	-
M339T26_2_NEG	Gly-His-Lys	26.145	339.199	5.40944e+06	2.72177e+06	1.88103e+06	4.82942e+06	6.67829e+06	4.551e+06	4.89641e+06	4.99384e+06	4.89597e+06	--	--	--	-	-	-	-
M91T128_NEG	Glycerol	128.187	91.055	267337	846846	652679	336913	172554	332298	431738	432221	328382	Organooxygen compounds	56-81-5	HMDB0000131	C00116	ko01100//Metabolic pathways;ko02010//ABC transporters;ko04723//Retrograde endocannabinoid signaling;ko00052//Galactose metabolism;ko04923//Regulation of lipolysis in adipocyte;ko00040//Pentose and glucuronate interconversions;ko00561//Glycerolipid metabolism	Carbohydrate metabolism;Endocrine system;Global and overview maps;Lipid metabolism;Membrane transport;Nervous system	Environmental Information Processing;Metabolism;Organismal Systems
M153T257_NEG	Glycerol 3-phosphate	257.407	152.995	11352	2313.29	4179.35	1481.75	10227.9	10656.7	10600	10595.7	9672.26	Glycerophospholipids	1957-03-04	HMDB0000126	C00093	ko01100//Metabolic pathways;ko01110//Biosynthesis of secondary metabolites;ko02010//ABC transporters;ko00564//Glycerophospholipid metabolism;ko05231//Choline metabolism in cancer;ko00561//Glycerolipid metabolism	Cancers;Global and overview maps;Lipid metabolism;Membrane transport	Environmental Information Processing;Human Diseases;Metabolism
M171T426_NEG	Glycerophosphate(2)	426.301	171.006	14036	2993.44	803.391	4017.12	7251.06	9877.36	10502	10500.2	9765.78	--	--	--	C00093	ko01100//Metabolic pathways;ko01110//Biosynthesis of secondary metabolites;ko02010//ABC transporters;ko00564//Glycerophospholipid metabolism;ko05231//Choline metabolism in cancer;ko00561//Glycerolipid metabolism	Cancers;Global and overview maps;Lipid metabolism;Membrane transport	Environmental Information Processing;Human Diseases;Metabolism
M256T380_NEG	Glycerophosphocholine	380.279	256.093	3105.12	1822.47	2207.17	2910.74	539.579	1559.18	3486.85	3330.54	3335.98	Glycerophospholipids	-	HMDB0011290	C00670	ko00564//Glycerophospholipid metabolism;ko05231//Choline metabolism in cancer;ko00565//Ether lipid metabolism	Cancers;Lipid metabolism	Human Diseases;Metabolism
M464T188_2_NEG	Glycocholate	187.766	464.276	9609.65	39217.4	64604.6	14860.1	293762	23980.8	26508	26500.9	24531.7	Steroids and steroid derivatives	863-57-0	HMDB0032596	C01921	ko01100//Metabolic pathways;ko04976//Bile secretion;ko00120//Primary bile acid biosynthesis	Digestive system;Global and overview maps;Lipid metabolism	Metabolism;Organismal Systems
M464T243_2_NEG	Glycocholic acid	243.448	464.3	373003	45692.6	75575.9	937492	1.03598e+06	676638	732910	726588	732924	Steroids and steroid derivatives	68753-51-5	HMDB0000331	C01921	ko01100//Metabolic pathways;ko04976//Bile secretion;ko00120//Primary bile acid biosynthesis	Digestive system;Global and overview maps;Lipid metabolism	Metabolism;Organismal Systems
M448T200_2_NEG	Glycodeoxycholic acid	199.789	448.306	849868	78739.1	124030	1.9419e+06	2.56896e+06	1.66361e+06	1.78945e+06	1.78972e+06	1.77458e+06	Steroids and steroid derivatives	360-65-6	HMDB0000631	-	-	-	-
M623T50_NEG	Grossamide or its isomer (not validated)	50.3955	623.238	7098.41	17476.7	38729.4	530372	100449	344469	236671	236697	233239	--	--	--	-	-	-	-
M362T458_NEG	Guanosine 5'-monophosphate	457.791	362.049	13246.2	3962.78	23093.9	3076.28	4915.48	3309.43	17202	21200.8	23571.6	Purine nucleotides	85-32-5	HMDB0001397	C00144	ko01100//Metabolic pathways;ko00230//Purine metabolism;ko04742//Taste transduction;ko04022//cGMP - PKG signaling pathway;ko04740//Olfactory transduction;ko04744//Phototransduction	Global and overview maps;Nucleotide metabolism;Sensory system;Signal transduction	Environmental Information Processing;Metabolism;Organismal Systems
M529T388_NEG	Harpagoside	387.629	529.157	34141	4954.3	41750.9	217465	413114	302432	285149	285156	283350	--	--	--	-	-	-	-
M326T326_NEG	Hboa + o-hex	325.699	326.087	818.94	2447.19	2446.95	13574.2	3368.99	3264.95	2248.33	2373.53	2241.47	--	--	--	-	-	-	-
M469T386_NEG	Hederacoside c	386.26	469.134	3671.71	2523.04	5340.98	18295.9	30325.1	24798.6	19426.8	19778.9	19425.7	--	--	--	-	-	-	-
M269T45_NEG	Heptadecanoic acid	44.741	269.248	2.10811e+06	1.27925e+07	7.84376e+06	954115	1.29787e+06	860496	4.20607e+06	4.20608e+06	4.64706e+06	Fatty Acyls	3546-17-6	HMDB0006497	-	-	-	-
M285T203_NEG	Hexadecanedioic acid	203.109	285.206	67171	496026	377385	316625	250206	349875	390056	395175	395179	Fatty Acyls	42150-38-9	HMDB0000712	C19615	ko01100//Metabolic pathways	Global and overview maps	Metabolism
M341T148_NEG	Hexadecanedioic acid, 3,3,14,14-tetramethyl-	147.589	341.268	87132.4	1.62398e+06	1.26393e+06	373116	495631	336302	418445	418846	397520	--	--	--	-	-	-	-
M178T184_NEG	Hippuric acid	184.18	178.05	153949	2799.11	5974.4	42001.9	65786.3	55178.3	73346	72537.6	72536.5	Benzene and substituted derivatives	495-69-2	HMDB0000714	C01586	ko00360//Phenylalanine metabolism	Amino acid metabolism	Metabolism
M257T163_NEG	His-Cys	163.105	257.078	26557.8	34129.4	47990.2	34513.8	34162	36095.7	33677.8	25339.9	33974.5	Carboxylic acids and derivatives	-	HMDB0028882	-	-	-	-
M241T101_NEG	His-ser	100.555	241.082	428397	482153	446409	298654	317779	309232	353766	363299	353513	Carboxylic acids and derivatives	-	HMDB0028894	C00214	ko01100//Metabolic pathways;ko00240//Pyrimidine metabolism	Global and overview maps;Nucleotide metabolism	Metabolism
M205T454_NEG	Homocitrate	453.775	205.034	38562.1	6550.29	7160.92	13980.9	5587.17	24831	28972.9	29858.6	33996.9	Carboxylic acids and derivatives	3562-74-1	HMDB0003518	C01251	ko01100//Metabolic pathways;ko01120//Microbial metabolism in diverse environments;ko01130//Biosynthesis of antibiotics;ko01230//Biosynthesis of amino acids;ko01210//2-Oxocarboxylic acid metabolism;ko00300//Lysine biosynthesis;ko00620//Pyruvate metabolism	Amino acid metabolism;Carbohydrate metabolism;Global and overview maps	Metabolism
M325T27_NEG	Hydroquinidine	26.604	325.183	3.24425e+06	1.73626e+06	956635	3.9294e+06	3.36701e+06	3.23e+06	3.26164e+06	3.22318e+06	3.26171e+06	--	--	--	-	-	-	-
M503T474_NEG	Hypericin	473.515	503.158	1883.37	760.952	556.433	1891.29	1566.27	1906.1	1769.98	1849.1	1740.92	Pyrenes	548-04-9	HMDB0034271	-	-	-	-
M108T339_NEG	Hypotaurine	339.423	108.012	4517.67	685.357	620.028	810.623	637.546	530.003	614.788	440.071	474.645	Sulfinic acids and derivatives	300-84-5	HMDB0000965	C00519	ko01100//Metabolic pathways;ko00430//Taurine and hypotaurine metabolism	Global and overview maps;Metabolism of other amino acids	Metabolism
M513T400_NEG	Icariside ii	400.357	513.16	8224.92	706.333	1691.04	1696.67	7577.97	4842.72	7085.93	7371.33	7342.18	--	--	--	-	-	-	-
M349T32_NEG	Idarubicin	32.032	349.059	114321	46169.1	95558.4	1.14058e+06	937564	1.13586e+06	628412	634301	628413	Anthracyclines	58957-92-9	HMDB0015308	-	-	-	-
M227T114_NEG	Ile-Pro	114.175	227.068	254274	256326	312959	136431	151148	123924	350566	342268	342262	--	--	--	C00526	ko00240//Pyrimidine metabolism	Nucleotide metabolism	Metabolism
M160T86_NEG	Indole-3-carboxylic acid	86.356	160.04	13651	29178.7	38044	33829.1	37309.6	36723.8	35937.8	36057.6	26129.9	Indoles and derivatives	771-50-6	HMDB0003320	-	-	-	-
M158T182_NEG	Indolelactic acid	181.573	158.06	49589.8	23415.4	32926.4	10764.5	13444.8	15419.6	18747.7	19495.1	18749.3	Indoles and derivatives	1821-52-9	HMDB0000671	C02043	ko00380//Tryptophan metabolism	Amino acid metabolism	Metabolism
M212T28_NEG	Indoxyl sulfate	28.353	212.004	330537	11726.8	20298.5	244679	559436	224322	185128	184211	183190	Organic sulfuric acids and derivatives	487-94-5	HMDB0000682	-	-	-	-
M267T211_NEG	Inosine	210.59	267.073	819334	15764.6	92648.9	262693	409474	557415	570414	565443	565431	Purine nucleosides	58-63-9	HMDB0000195	C00294	ko01100//Metabolic pathways;ko00230//Purine metabolism	Global and overview maps;Nucleotide metabolism	Metabolism
M347T439_NEG	Inosine 5'-monophosphate	439.089	347.038	19129.2	2492.3	6680.03	2392.24	3099.82	2581.24	13444.5	11753.3	12465.5	Purine nucleotides	131-99-7	HMDB0000175	C00130	ko01100//Metabolic pathways;ko01110//Biosynthesis of secondary metabolites;ko01130//Biosynthesis of antibiotics;ko00230//Purine metabolism;ko04742//Taste transduction	Global and overview maps;Nucleotide metabolism;Sensory system	Metabolism;Organismal Systems
M564T243_NEG	Ipecoside	243.464	564.223	441.833	1157.21	2317.52	1046.24	1649.49	1087.65	6409.84	6689.13	6687.22	--	--	--	-	-	-	-
M146T40_NEG	Isatin	39.575	146.024	1360.13	6316.95	13307.1	13981.4	23264.8	18628.2	17582.8	17573.7	18593.1	Indoles and derivatives	91-56-5	HMDB0061933	-	-	-	-
M367T389_NEG	Isoanhydroicaritin	388.81	367.104	2.76064e+06	19802.5	131579	202788	515139	626784	1.17699e+06	1.18654e+06	1.17697e+06	--	--	--	-	-	-	-
M373T60_NEG	Isodeoxycholic acid	59.9075	373.274	91854.4	1.62901e+06	3.0001e+06	654859	454962	428370	690834	690796	657077	Steroids and steroid derivatives	566-17-6	HMDB0002536	-	-	-	-
M269T28_NEG	Isoimperatorin	27.636	269.084	42236.2	26444.2	33956.1	47711.2	51153.9	36361.1	45948.6	46705	46704	--	--	--	-	-	-	-
M299T37_NEG	Isokaempferide	37.338	299.055	1978.69	9073	15236	53172	17703	21921.9	24232.1	27618.1	27606	--	--	--	-	-	-	-
M341T326_NEG	Isomaltose	325.501	341.086	1932.45	4254.1	3724.94	43725.5	9052.65	16095.1	13792	13785.2	13569.9	Organooxygen compounds	499-40-1	HMDB0002923	C00252	ko00500//Starch and sucrose metabolism	Carbohydrate metabolism	Metabolism
M227T407_NEG	Isopentenyl pyrophosphate	407.438	226.996	23841.9	1781.95	2235.34	1678.86	2359.46	2115.41	7013.27	6972.55	7687.42	Prenol lipids	358-71-4	HMDB0001347	C00129	ko01100//Metabolic pathways;ko01110//Biosynthesis of secondary metabolites;ko01130//Biosynthesis of antibiotics;ko00900//Terpenoid backbone biosynthesis	Global and overview maps;Metabolism of terpenoids and polyketides	Metabolism
M639T306_NEG	Isorhamnetin-3-glucoside-4'-glucoside (isorhamnetin 3,4'-diglucoside)	305.637	639.154	41.8884	533.898	1516.88	5466.5	2723.6	3880.92	3193.78	3458.89	3198.74	--	--	--	-	-	-	-
M639T257_NEG	Isorhamnetin-3,7-diglucoside	257.028	639.154	843.259	1064.87	4412.02	20324.9	3295.83	11327.6	5320.37	5675.09	5342.48	--	--	--	-	-	-	-
M707T495_NEG	Jasplakinolide	495.172	707.223	12416.8	485.154	1457.8	3656.65	7422.06	8083.99	8122.7	8249.21	8118.65	--	--	--	-	-	-	-
M485T24_NEG	Kendomycin	23.754	485.292	55707	101664	285296	339177	271146	300335	311021	315909	315917	--	--	--	-	-	-	-
M129T121_NEG	Ketoleucine	120.788	129.055	23013.8	104646	186513	42587.8	41910.7	56158.3	70844.3	70844.1	71368.7	Keto acids and derivatives	816-66-0	HMDB0000695	C00233	ko01100//Metabolic pathways;ko01110//Biosynthesis of secondary metabolites;ko01230//Biosynthesis of amino acids;ko01210//2-Oxocarboxylic acid metabolism;ko00280//Valine, leucine and isoleucine degradation;ko00290//Valine, leucine and isoleucine biosynthesis	Amino acid metabolism;Global and overview maps	Metabolism
M455T74_NEG	L-alaninamide, n-[2-[2-(hydroxyamino)-2-oxoethyl]-4-methyl-1-oxopentyl]-3-(2-naphthalenyl)-l-alanyl-	73.61	455.245	374800	250914	418922	363818	269661	290201	348446	340253	342048	--	--	--	-	-	-	-
M88T404_NEG	L-Alanine	404.271	88.04	164068	8523.26	16114.1	6327.15	12442.2	15705.1	41085.2	41082.7	39811.9	Carboxylic acids and derivatives	302-72-7	HMDB0062251	C01401	ko00460//Cyanoamino acid metabolism	Metabolism of other amino acids	Metabolism
M147T76_NEG	L-Arabinono-1,4-lactone	75.826	147.029	103914	12164.7	19398.8	37435.1	27243.8	28729.8	37365.1	36577.1	36575.3	--	--	--	C01114	ko01100//Metabolic pathways;ko00053//Ascorbate and aldarate metabolism	Carbohydrate metabolism;Global and overview maps	Metabolism
M351T445_NEG	L-Ascorbic acid	445.009	351.055	1555.47	1913.63	1807.17	9601.07	7298.76	9148.4	10784.6	10288.9	10790.5	Dihydrofurans	50-81-7	HMDB0000044	C00072	ko01100//Metabolic pathways;ko01110//Biosynthesis of secondary metabolites;ko01120//Microbial metabolism in diverse environments;ko00053//Ascorbate and aldarate metabolism;ko00480//Glutathione metabolism;ko04977//Vitamin digestion and absorption;ko04066//HIF-1 signaling pathway	Carbohydrate metabolism;Digestive system;Global and overview maps;Metabolism of other amino acids;Signal transduction	Environmental Information Processing;Metabolism;Organismal Systems
M425T92_NEG	L-cysteine-glutathione disulfide	91.887	425.074	72997.1	73197.5	169601	1.05825e+06	974188	1.23481e+06	639079	579437	580343	--	--	--	-	-	-	-
M146T428_NEG	L-Glutamate	427.908	146.045	264946	40783.4	70102.8	39702.8	44820.6	54117.4	140733	149932	140835	Carboxylic acids and derivatives	-	HMDB0060475	C00025	ko01100//Metabolic pathways;ko01110//Biosynthesis of secondary metabolites;ko01120//Microbial metabolism in diverse environments;ko01130//Biosynthesis of antibiotics;ko02010//ABC transporters;ko01230//Biosynthesis of amino acids;ko04080//Neuroactive ligand-receptor interaction;ko04742//Taste transduction;ko01210//2-Oxocarboxylic acid metabolism;ko05230//Central carbon metabolism in cancer;ko00330…	Amino acid metabolism;Biosynthesis of other secondary metabolites;Cancers;Carbohydrate metabolism;Cellular community - eukaryotes;Digestive system;Energy metabolism;Environmental adaptation;Excretory system;Global and overview maps;Membrane transport;Metabolism of cofactors and vitamins;Metabolism of other amino acids;Nervous system;Neurodegenerative diseases;Sensory system;Signal transduction;Si…	Cellular Processes;Environmental Information Processing;Genetic Information Processing;Human Diseases;Metabolism;Organismal Systems
M145T412_NEG	L-Glutamine	412.363	145.061	160547	17417	31163	34578.4	54854.8	36466.4	76801.8	76801.7	77033.5	Carboxylic acids and derivatives	5959-95-5	HMDB0003423	C00064	ko01100//Metabolic pathways;ko01120//Microbial metabolism in diverse environments;ko02010//ABC transporters;ko01230//Biosynthesis of amino acids;ko00230//Purine metabolism;ko00240//Pyrimidine metabolism;ko05230//Central carbon metabolism in cancer;ko04974//Protein digestion and absorption;ko00970//Aminoacyl-tRNA biosynthesis;ko00250//Alanine, aspartate and glutamate metabolism;ko00220//Arginine b…	Amino acid metabolism;Cancers;Carbohydrate metabolism;Digestive system;Energy metabolism;Excretory system;Global and overview maps;Membrane transport;Metabolism of other amino acids;Nervous system;Nucleotide metabolism;Translation	Environmental Information Processing;Genetic Information Processing;Human Diseases;Metabolism;Organismal Systems
M195T392_NEG	L-gulono-1,4-lactone	391.799	195.05	219021	30281.5	35528.4	498789	178279	401678	139965	132147	132482	Lactones	1128-23-0	HMDB0003466	C01040	ko01100//Metabolic pathways;ko00053//Ascorbate and aldarate metabolism	Carbohydrate metabolism;Global and overview maps	Metabolism
M563T159_NEG	L-homoarginine	159.464	563.392	8159.83	22000.1	32159.8	147680	77159.3	76661.1	39756.7	39756.9	39293.5	Carboxylic acids and derivatives	156-86-5	HMDB0000670	-	-	-	-
M182T73_NEG	L-homocysteic acid	73.0855	182.012	4698.4	20142.5	37013	48850.8	236620	71073.5	131321	124904	125323	Carboxylic acids and derivatives	14857-77-3	HMDB0002205	-	-	-	-
M241T343_NEG	L-Iditol	342.507	241.09	25404.5	33969.9	33161.6	28460.8	23007.9	32033.1	19695.2	10580.5	19759.2	Organooxygen compounds	488-45-9	HMDB0011632	-	-	-	-
M133T473_NEG	L-Malic acid	473.218	133.014	246502	18507.3	73629.4	94233.5	195279	344564	81779.1	78384	79280.5	Hydroxy acids and derivatives	97-67-6	HMDB0000156	C00149	ko01100//Metabolic pathways;ko01110//Biosynthesis of secondary metabolites;ko01120//Microbial metabolism in diverse environments;ko01130//Biosynthesis of antibiotics;ko04742//Taste transduction;ko05230//Central carbon metabolism in cancer;ko01200//Carbon metabolism;ko05200//Pathways in cancer;ko00630//Glyoxylate and dicarboxylate metabolism;ko04922//Glucagon signaling pathway;ko00620//Pyruvate me…	Cancers;Carbohydrate metabolism;Endocrine system;Excretory system;Global and overview maps;Sensory system	Human Diseases;Metabolism;Organismal Systems
M148T302_NEG	L-methionine	302.349	148.043	50662.9	1939.83	7740.9	1313.74	3931.39	4628.74	8070.55	7958.23	7841.31	Carboxylic acids and derivatives	59-51-8	HMDB0033951	C00073	ko01100//Metabolic pathways;ko01110//Biosynthesis of secondary metabolites;ko01230//Biosynthesis of amino acids;ko01210//2-Oxocarboxylic acid metabolism;ko05230//Central carbon metabolism in cancer;ko04974//Protein digestion and absorption;ko00270//Cysteine and methionine metabolism;ko00970//Aminoacyl-tRNA biosynthesis;ko04978//Mineral absorption	Amino acid metabolism;Cancers;Digestive system;Global and overview maps;Translation	Genetic Information Processing;Human Diseases;Metabolism;Organismal Systems
M130T275_NEG	L-Norleucine	275.19	130.087	1.75221e+06	490304	656035	141898	343874	143669	905352	899601	899603	Carboxylic acids and derivatives	327-57-1	HMDB0001645	-	-	-	-
M161T301_NEG	L-Sorbose	301.325	161.045	19242.5	6923.88	13360.3	28317	27817.1	21979.6	26186.4	27295.1	27334.7	Organooxygen compounds	87-79-6	HMDB0001266	C00247	ko00051//Fructose and mannose metabolism	Carbohydrate metabolism	Metabolism
M135T345_NEG	L-threonate	345.195	135.03	1.05091e+06	24527.8	53791.5	47837.6	76399.4	88460.7	437443	437374	416104	--	--	--	C01620	ko00053//Ascorbate and aldarate metabolism	Carbohydrate metabolism	Metabolism
M545T476_NEG	L-thyronine	476.154	545.17	25254.1	1287.95	3001.23	8691.39	10326.8	13388.7	12616.4	12457.3	12951.7	Carboxylic acids and derivatives	1596-67-4	HMDB0000667	-	-	-	-
M116T305_NEG	L-Valine	304.606	116.071	281526	35503.8	47015.5	17146.3	39170.1	68863.1	144476	147219	144375	Carboxylic acids and derivatives	72-18-4	HMDB0000883	C00183	ko01100//Metabolic pathways;ko01110//Biosynthesis of secondary metabolites;ko01130//Biosynthesis of antibiotics;ko02010//ABC transporters;ko01230//Biosynthesis of amino acids;ko01210//2-Oxocarboxylic acid metabolism;ko05230//Central carbon metabolism in cancer;ko04974//Protein digestion and absorption;ko00970//Aminoacyl-tRNA biosynthesis;ko00460//Cyanoamino acid metabolism;ko04978//Mineral absorp…	Amino acid metabolism;Cancers;Digestive system;Global and overview maps;Membrane transport;Metabolism of cofactors and vitamins;Metabolism of other amino acids;Translation	Environmental Information Processing;Genetic Information Processing;Human Diseases;Metabolism;Organismal Systems
M325T403_NEG	Lactitol	402.831	325.112	14507.3	2395.18	5390.44	3785.4	18761.7	24272.4	13884.1	13628.4	13625.3	Fatty Acyls	585-86-4	HMDB0040937	-	-	-	-
M647T442_1_NEG	Laminaritetraose	442.442	647.183	3863.05	963.072	1447.4	2776.84	3373.71	2340.69	16556.2	15578.1	16556.3	--	--	--	-	-	-	-
M539T27_NEG	Leptomycin b	26.604	539.337	131213	693532	941294	633215	615570	637094	591457	630902	627336	--	--	--	-	-	-	-
M243T212_NEG	Leu-Ile	211.577	243.159	61689.3	241959	266520	315928	260468	426499	327472	309938	309820	Carboxylic acids and derivatives	-	HMDB0028932	-	-	-	-
M495T57_NEG	Leukotriene d4	56.579	495.276	18628.6	129019	150895	48750.5	39768.9	37017.6	53670.7	53673.4	53330.7	Fatty Acyls	73836-78-9	HMDB0003080	C05951	ko01100//Metabolic pathways;ko04080//Neuroactive ligand-receptor interaction;ko00590//Arachidonic acid metabolism;ko04664//Fc epsilon RI signaling pathway;ko05310//Asthma	Global and overview maps;Immune diseases;Immune system;Lipid metabolism;Signaling molecules and interaction	Environmental Information Processing;Human Diseases;Metabolism;Organismal Systems
M367T36_NEG	Lignoceric acid	36.089	367.355	305813	106669	55231.5	116741	64841.4	80466.5	46444.5	46055.4	46588.6	Fatty Acyls	557-59-5	HMDB0002003	C08320	ko01040//Biosynthesis of unsaturated fatty acids	Lipid metabolism	Metabolism
M379T34_NEG	Limaprost	33.99	379.25	81354.9	2.40365e+06	757188	171379	128385	143094	635089	630147	630110	--	--	--	-	-	-	-
M279T40_NEG	Linoleic acid	40.3875	279.233	6.48783e+06	1.33e+06	1.88202e+06	1.32757e+07	1.85077e+07	7.50165e+06	9.88652e+06	9.90901e+06	9.06639e+06	Fatty Acyls	506-21-8	HMDB0006270	C01595	ko01100//Metabolic pathways;ko00591//Linoleic acid metabolism;ko01040//Biosynthesis of unsaturated fatty acids	Global and overview maps;Lipid metabolism	Metabolism
M674T171_NEG	Linoleoylglycine	171.103	673.526	72449.5	5231.69	6659.79	6238.07	12027.2	17132.1	7537.78	7537.68	7733.26	--	--	--	-	-	-	-
M375T84_NEG	Lithocholic acid	84.1885	375.29	1.17292e+06	7.80659e+06	6.21112e+06	1.77675e+07	1.49375e+07	1.42883e+07	8.87584e+06	8.859e+06	8.81845e+06	Lipids and lipid-like molecules	434-13-9	HMDB0000761	C03990	ko04976//Bile secretion	Digestive system	Organismal Systems
M432T162_NEG	Lithocholylglycine	162.262	432.31	97091.6	28361.9	30932	248216	262326	187930	189620	194533	194549	Steroids and steroid derivatives	474-74-8	HMDB0000698	-	-	-	-
M888T460_NEG	Lnfp iii	459.525	888.285	112244	67.2194	309.407	182.963	635.301	1432.63	21877.6	20947.4	21485.7	Organooxygen compounds	213250-53-4	HMDB0006696	-	-	-	-
M421T185_NEG	Lovastatin hydroxy acid	185.223	421.257	14804.3	57473.7	71080.4	160060	66726.9	77201	70418.6	70427.9	69151.1	--	--	--	-	-	-	-
M476T145_NEG	Lpe 18:2	144.52	476.275	99864.3	56626.9	85899.2	125062	149367	159069	97711	125696	124634	--	--	--	-	-	-	-
M624T233_2_NEG	Ltc4-[d5]	232.871	624.277	642.239	2204.48	3627.15	12474.7	16221.8	26116.4	10131.9	9879.72	9880.72	--	--	--	C02166	ko01100//Metabolic pathways;ko04976//Bile secretion;ko04080//Neuroactive ligand-receptor interaction;ko00590//Arachidonic acid metabolism;ko04726//Serotonergic synapse;ko04664//Fc epsilon RI signaling pathway;ko05310//Asthma	Digestive system;Global and overview maps;Immune diseases;Immune system;Lipid metabolism;Nervous system;Signaling molecules and interaction	Environmental Information Processing;Human Diseases;Metabolism;Organismal Systems
M165T182_NEG	M-fluoro-dl-phenylalanine	182.008	165.055	8459.26	14287.1	24782.5	20345	14373.2	27382.8	19749.9	19692.6	19699.5	--	--	--	-	-	-	-
M609T113_NEG	M-hydroxybenzoylecgonine	112.587	609.222	23390.4	30106.9	49663	157747	21380.6	121606	77989.1	77514.1	57618.4	--	--	--	-	-	-	-
M265T108_2_NEG	Magnolol	107.888	265.145	26118.3	24418.4	36221.3	74916.8	68969.1	86876.5	50126	54414.7	50022.1	--	--	--	-	-	-	-
M133T407_NEG	Malate	407.358	133.014	1.84386e+06	186217	65153.8	280233	289278	490319	830436	678602	828894	Hydroxy acids and derivatives	6915-15-7	HMDB0000744	-	-	-	-
M163T387_NEG	Malonic acid	387.08	163.024	17592.6	6247.97	12001.9	14521.2	13835.1	17443.8	29151.8	33576.9	28814.6	Carboxylic acids and derivatives	141-82-2	HMDB0000691	C00383	ko00240//Pyrimidine metabolism;ko00410//beta-Alanine metabolism	Metabolism of other amino acids;Nucleotide metabolism	Metabolism
M381T125_NEG	Maltitol	124.688	381.076	7545.54	112400	23065.4	25412.4	20264.9	21134.4	23569.5	23076.2	23269.5	Fatty Acyls	585-88-6	HMDB0002928	-	-	-	-
M503T443_NEG	Maltotriose	442.664	503.16	2257.61	1881.95	1169.1	23302.6	27509	20892.6	19128.8	20241.4	19151.7	Organooxygen compounds	1109-28-0	HMDB0001262	C01835	ko02010//ABC transporters;ko04973//Carbohydrate digestion and absorption	Digestive system;Membrane transport	Environmental Information Processing;Organismal Systems
M677T254_NEG	Medicagenic acid base + o-hexa	253.597	677.337	82.0993	2651.78	3357.5	401.419	198.403	159.628	660.283	660.938	682.246	--	--	--	-	-	-	-
M565T125_NEG	Mesoporphyrin ix	125.086	565.282	56964.3	603665	725475	261859	161040	158608	254168	268153	255447	Tetrapyrroles and derivatives	493-90-3	HMDB0002379	-	-	-	-
M309T25_NEG	Mestranol	24.952	309.172	192864	95156.8	60806.8	259962	296249	200362	238991	243127	243220	Steroids and steroid derivatives	72-33-3	HMDB0015446	-	-	-	-
M645T235_NEG	Methanone, [1-(5-hydroxypentyl)-1h-indol-3-yl](4-hydroxyphenyl)-	235.047	645.302	5991.38	1377.84	8380.17	1229.97	1887.99	2140.31	6399.34	6815.56	6399.39	--	--	--	-	-	-	-
M453T112_NEG	Methotrexate	111.798	453.178	26531.9	34597.8	65449.9	2.7561e+06	1.02657e+06	943525	811045	942662	942758	Carboxylic acids and derivatives	1959-05-02	HMDB0014703	C01937	ko04976//Bile secretion	Digestive system	Organismal Systems
M419T161_NEG	Methyl 10-acetyloxy-4,5,9-trihydroxy-1,4a-dimethyl-7-propan-2-yl-2,3,4,9,10,10a-hexahydrophenanthrene-1-carboxylate	161.356	419.208	653.493	25111.2	45670.1	12570.6	33849.9	3452.05	29442.4	29584.4	29441.1	--	--	--	-	-	-	-
M311T74_NEG	Methyl-13-hydroperoxy-delta9e,11e-octadecadienoate	73.61	311.221	11161.6	120215	31851.9	36077.7	45717	56449.1	45568.3	38940	39097.2	--	--	--	-	-	-	-
M311T36_NEG	Methyl-9-hydroperoxy-delta10e,12e-octadecadienoic acid	36.483	311.222	113866	64630.6	173593	181580	211660	27605.3	35060.7	34241.6	35040.6	--	--	--	-	-	-	-
M117T456_NEG	Methylmalonic acid	455.813	117.019	11002.5	2502.47	4263.03	8465.62	6006.42	11715.1	14406	14289	12994.3	Carboxylic acids and derivatives	516-05-2	HMDB0000202	C02170	ko00240//Pyrimidine metabolism;ko00280//Valine, leucine and isoleucine degradation;ko00640//Propanoate metabolism	Amino acid metabolism;Carbohydrate metabolism;Nucleotide metabolism	Metabolism
M207T147_NEG	Mevalonic acid	146.793	207.087	2644.21	10284.4	63662.6	1343.89	6035.54	1440.8	19430.3	17999.8	19401.6	Fatty Acyls	150-97-0	HMDB0000227	C00418	ko01100//Metabolic pathways;ko01110//Biosynthesis of secondary metabolites;ko01130//Biosynthesis of antibiotics;ko00900//Terpenoid backbone biosynthesis	Global and overview maps;Metabolism of terpenoids and polyketides	Metabolism
M219T229_NEG	Mirin	229.226	219.017	4688.9	926.758	1886.65	1597.32	5306.22	2206.49	11013	11026.1	11768.2	--	--	--	-	-	-	-
M443T208_NEG	Mitoxantrone	208.409	443.208	1689.69	32016.8	61652.5	34169	20774.2	33603.3	27124.9	27500.5	27499.7	Anthracenes	65271-80-9	HMDB0015335	-	-	-	-
M397T26_NEG	Mitragynine	25.649	397.224	82017.8	28301.2	19525.5	85669.8	98990.3	61890.7	91490.8	89601.1	90917.9	Corynanthean-type alkaloids	6202-22-8	HMDB0041933	-	-	-	-
M209T367_NEG	Mucic acid	367.066	209.008	2007.49	1906.21	2449.59	1847.4	1482.46	2350.25	2351.98	2613.43	2361.91	Organooxygen compounds	87-73-0	HMDB0029881	C00879	ko00053//Ascorbate and aldarate metabolism	Carbohydrate metabolism	Metabolism
M310T265_NEG	Muramic acid	265.083	310.113	109960	4318.76	10818.9	32924.5	75959.3	71229.5	67580.3	63341.1	63281.9	Organooxygen compounds	1114-41-6	HMDB0003254	-	-	-	-
M495T405_NEG	Mycophenolic acid .beta.-d-glucuronide	405.179	495.131	1316.97	904.391	666.742	1291.15	2444.49	1627.76	3062.92	2888.93	2887.64	--	--	--	-	-	-	-
M179T388_2_NEG	Myo-inositol	388.035	179.056	5.67569e+06	335978	891271	1.36031e+06	2.37893e+06	3.03491e+06	3.47481e+06	3.4862e+06	3.47476e+06	Organooxygen compounds	87-89-8	HMDB0000211	C00137	ko01100//Metabolic pathways;ko01120//Microbial metabolism in diverse environments;ko01130//Biosynthesis of antibiotics;ko02010//ABC transporters;ko00053//Ascorbate and aldarate metabolism;ko00052//Galactose metabolism;ko00562//Inositol phosphate metabolism;ko04070//Phosphatidylinositol signaling system	Carbohydrate metabolism;Global and overview maps;Membrane transport;Signal transduction	Environmental Information Processing;Metabolism
M227T48_NEG	Myristic acid	48.412	227.201	1.01175e+06	4.9552e+06	4.88369e+06	1.0454e+06	944767	1.51058e+06	2.77951e+06	2.7784e+06	2.92083e+06	Fatty Acyls	544-63-8	HMDB0000806	C06424	ko01100//Metabolic pathways;ko00061//Fatty acid biosynthesis	Global and overview maps;Lipid metabolism	Metabolism
M642T150_NEG	N-(dodecanoyl)-1-.beta.-glucosyl-sphing-4-enine	149.726	642.484	9749.51	3405.11	4116.17	296.272	770.862	226.812	1510.6	1484.62	1510.94	--	--	--	-	-	-	-
M560T200_NEG	N-(dodecanoyl)sphing-4-enine-1-phosphate	199.521	560.415	146.529	3705.67	17886.7	2212.7	2919.18	2462.05	3962.54	3671.26	3960.85	Sphingolipids	-	HMDB0010699	-	-	-	-
M517T477_NEG	N-[tris(hydroxymethyl)methyl]-3-amino-2-hydroxypropanesulfonic acid	476.675	517.139	1110.03	1061.78	2331.37	7297.16	6769.93	6573.17	7094.38	6461.53	6495.79	--	--	--	-	-	-	-
M300T164_NEG	N-acetyl-d-galactosamine 4-sulfate	164.337	300.037	109124	7998.41	10034.2	12406.3	10676.9	32106.2	37987.3	51557.8	51553.9	Organooxygen compounds	45233-43-0	HMDB0000781	-	-	-	-
M300T253_NEG	N-Acetyl-D-Glucosamine 6-Phosphate	253.405	300.038	22498.2	2324.41	5251.89	57780.4	74861	56766.4	63806.4	63436	63213	Organooxygen compounds	18191-20-3	HMDB0001062	C00357	ko01100//Metabolic pathways;ko01130//Biosynthesis of antibiotics;ko00520//Amino sugar and nucleotide sugar metabolism	Carbohydrate metabolism;Global and overview maps	Metabolism
M174T386_NEG	N-acetyl-l-aspartic acid	386.249	174.04	313561	35181.8	47177.4	27905.5	33422.2	42812.9	96916.8	96220.6	96926.8	Carboxylic acids and derivatives	997-55-7	HMDB0000812	C01042	ko01100//Metabolic pathways;ko00250//Alanine, aspartate and glutamate metabolism	Amino acid metabolism;Global and overview maps	Metabolism
M188T380_NEG	N-acetyl-l-glutamate	380.167	188.056	29407.2	29530.2	75876.1	17559.7	14985.2	16204.6	33625.2	32131.8	32153.5	Carboxylic acids and derivatives	1188-37-0	HMDB0001138	C00624	ko01100//Metabolic pathways;ko01110//Biosynthesis of secondary metabolites;ko01130//Biosynthesis of antibiotics;ko01230//Biosynthesis of amino acids;ko01210//2-Oxocarboxylic acid metabolism;ko00220//Arginine biosynthesis	Amino acid metabolism;Global and overview maps	Metabolism
M190T192_NEG	N-acetyl-l-methionine	192.48	190.053	108334	7757.43	13068.7	13542.2	6136.53	13494.3	22914.9	20258.6	20274.5	Carboxylic acids and derivatives	65-82-7	HMDB0011745	-	-	-	-
M206T312_NEG	N-Acetyl-L-phenylalanine	312.239	206.082	374.608	1211.28	1818.63	36093.9	10008.7	17889.4	13463.6	14001.8	14002	Carboxylic acids and derivatives	2018-61-3	HMDB0000512	C03519	ko00360//Phenylalanine metabolism	Amino acid metabolism	Metabolism
M621T204_NEG	N-acetyl-l-phenylalanyl-3,5-diiodo-l-tyrosine	204.02	620.958	879.39	688.413	688.413	65.5042	369.373	1577.63	117.108	92.4091	91.3316	--	--	--	-	-	-	-
M449T86_NEG	N-acetyl-p-fluoro-dl-phenylalanine	86.408	449.147	5306.54	49162.2	6632.07	527684	181123	308033	187623	167079	168101	--	--	--	-	-	-	-
M434T182_NEG	N-acetyl-s-geranylgeranyl-l-cysteine	182.363	434.265	22390.2	13807.4	36154.2	82934.7	95383.2	87098.2	55539.6	55538.1	55269	--	--	--	-	-	-	-
M303T436_NEG	N-acetylaspartylglutamic acid	436.005	303.082	17990.6	1138.65	1245.81	1465.2	1930.11	1448	4512.63	4816.33	4815.85	Carboxylic acids and derivatives	3106-85-2	HMDB0001067	C12270	ko01100//Metabolic pathways;ko04080//Neuroactive ligand-receptor interaction;ko00250//Alanine, aspartate and glutamate metabolism	Amino acid metabolism;Global and overview maps;Signaling molecules and interaction	Environmental Information Processing;Metabolism
M220T282_NEG	N-acetylmannosamine	282.041	220.082	27174.2	39315	28636.7	30165.2	34967.9	38713	30928.1	31882.6	31880.6	Organooxygen compounds	7772-94-3	HMDB0001129	C00645	ko01100//Metabolic pathways;ko00520//Amino sugar and nucleotide sugar metabolism	Carbohydrate metabolism;Global and overview maps	Metabolism
M292T299_NEG	N-acetylmuramic acid	298.623	292.103	2665.93	17039.4	13165.5	9872.46	8720.6	11569.2	10432.3	9771.83	10156.1	Organooxygen compounds	-	HMDB0060493	C02713	ko01100//Metabolic pathways;ko00520//Amino sugar and nucleotide sugar metabolism	Carbohydrate metabolism;Global and overview maps	Metabolism
M308T368_NEG	N-acetylneuraminic acid	367.638	308.097	84282.2	68764.8	116657	65920.8	80746	93147.6	83691.1	82625.1	83654.5	Organooxygen compounds	131-48-6	HMDB0000230	C00270	ko01100//Metabolic pathways;ko00520//Amino sugar and nucleotide sugar metabolism	Carbohydrate metabolism;Global and overview maps	Metabolism
M146T297_NEG	N-acetylserine	296.675	146.045	45194.4	11825.8	24473	16057.8	20424.8	21896.1	28682.1	28711.1	28541.5	Carboxylic acids and derivatives	16354-58-8	HMDB0002931	-	-	-	-
M245T312_NEG	N-acetyltryptophan	312.084	245.091	1291.48	3313.77	1785.09	11021.9	2619.03	9418.45	4198.64	4303.29	4303.12	Carboxylic acids and derivatives	1218-34-4	HMDB0013713	-	-	-	-
M187T386_NEG	N-alpha-acetyl-l-lysine	386.217	187.108	4516.9	3579.31	11156.5	3385.69	3545.6	5406.51	9482.33	9477.74	9336.26	Carboxylic acids and derivatives	1946-82-3	HMDB0000446	-	-	-	-
M388T286_NEG	N-arachidonoyl-.gamma.-aminobutyric acid	285.567	388.283	851.456	36277.4	48446.4	7185.47	5706.49	6896.25	11696.8	11714.4	12284.4	--	--	--	-	-	-	-
M625T405_NEG	N-caffeoyl-o-methyltyramine	405.182	625.254	574.524	3200.21	4682.7	3778.97	5089.01	8099.16	4474.33	4313.99	4316.12	--	--	--	-	-	-	-
M324T391_NEG	N-glycolylneuraminic acid	391.322	324.091	33448.6	7078.94	16666.4	23213.8	29215.8	36879.9	20840.3	20574.4	21208.2	Carbohydrates and carbohydrate conjugates	-	HMDB0062502	C03410	ko00520//Amino sugar and nucleotide sugar metabolism	Carbohydrate metabolism	Metabolism
M147T428_NEG	N-nitroso(2-hydroxyethyl)glycine	428.493	147.029	24243.6	10686.6	16662.2	17972.7	13453.1	19158.3	15135.2	13719.3	15199.4	--	--	--	-	-	-	-
M537T33_NEG	N-palmitoyl-d-sphingosine	32.8835	536.504	231336	9341.46	11505.7	27145.8	44868.4	34682	15667	18957.7	19019.9	--	--	--	-	-	-	-
M211T37_NEG	N-propyl gallate	36.883	211.039	51622.6	120550	116569	164189	196680	115809	137630	144209	137630	Benzene and substituted derivatives	121-79-9	HMDB0033835	-	-	-	-
M247T50_2_NEG	Nabilone	50.5	247.169	2796.43	77241.1	24182.8	2257.86	2518.79	3561.01	12534.3	12557.5	12444.1	Naphthopyrans	51022-71-0	HMDB0014629	-	-	-	-
M271T423_NEG	Naringenin	422.896	271.045	3249.65	3409.03	2399.38	6430.8	5764.38	6225.5	6723.78	6932.66	6720.89	Flavonoids	480-41-1	HMDB0002670	C00509	ko01100//Metabolic pathways;ko01110//Biosynthesis of secondary metabolites	Global and overview maps	Metabolism
M433T164_NEG	Naringenin-7-O-Glucoside	164.436	433.111	5504.03	13382.6	19161.4	179982	59051.6	96091.9	61139	61315.8	61400.5	--	--	--	-	-	-	-
M664T462_NEG	Natamycin	461.744	664.277	8646.72	334.351	191.124	37.3332	305.859	631.718	3195.39	3093.65	3090.52	Organooxygen compounds	7681-93-8	HMDB0014964	-	-	-	-
M377T221_NEG	Neotame	220.95	377.231	1647.46	8209.3	13848.6	9989	7639.76	8103.33	8749.12	9243.64	8744.14	Carboxylic acids and derivatives	165450-17-9	HMDB0034566	-	-	-	-
M477T171_2_NEG	Nepetin 7-glucoside	171.092	477.102	9985.62	7875.53	16902.6	956691	150819	430591	237625	235908	236925	Flavonoids	569-90-4	HMDB0030548	-	-	-	-
M528T387_NEG	Nilotinib	387.49	528.159	8987.1	1400.57	11735.6	49964.1	94253	74965.1	65672.9	64612.3	64614.6	Benzene and substituted derivatives	641571-10-0	HMDB0015595	-	-	-	-
M599T237_NEG	Nocardamine	237.01	599.318	334350	34208.2	64813.3	71332.1	80076.5	85826.2	130020	130020	127890	--	--	--	-	-	-	-
M399T172_NEG	Nocloprost	172.334	399.233	12946.4	21481.4	25055.7	47444.8	43506.7	52994.4	33846.9	32163.6	32060.1	--	--	--	-	-	-	-
M637T263_NEG	Norfloxacin	262.744	637.274	120.411	5702.01	5767.84	840.713	997.35	761.872	1430.38	1427.79	1430.38	Quinolines and derivatives	70458-96-7	HMDB0015192	C06687	ko02010//ABC transporters	Membrane transport	Environmental Information Processing
M932T181_1_NEG	Notoginsenoside r1	181.107	931.532	14542.9	3273.57	4272.79	2860.73	3152.98	2822.01	4778.97	4775.73	4471.84	Prenol lipids	80418-24-2	HMDB0035363	-	-	-	-
M166T669_NEG	O-nitrobenzoic acid	669.168	166.014	327.126	635.926	773.405	715.623	592.82	1137.07	1261.44	1331.75	1330.35	--	--	--	C16234	ko01120//Microbial metabolism in diverse environments	Global and overview maps	Metabolism
M199T233_NEG	O-Phospho-L-homoserine	232.653	199.027	1066.7	1863.8	964.317	3286.93	3263.79	4063.28	3205.1	3204.01	3052.77	Carboxylic acids and derivatives	4210-66-6	HMDB0003484	C01102	ko01100//Metabolic pathways;ko01110//Biosynthesis of secondary metabolites;ko01120//Microbial metabolism in diverse environments;ko01230//Biosynthesis of amino acids;ko00260//Glycine, serine and threonine metabolism	Amino acid metabolism;Global and overview maps	Metabolism
M215T96_NEG	O-Phospho-L-threonine	96.2715	215.043	1832.45	2451.24	4928.82	15469.8	10966.1	18300.7	4349.57	7092.61	4681.33	--	--	--	C12147	ko00860//Porphyrin and chlorophyll metabolism	Metabolism of cofactors and vitamins	Metabolism
M140T459_NEG	O-phosphoethanolamine	459.45	140.011	357710	8301.8	26845.8	2782.82	2646.91	4595.9	75171.6	69967.6	75270	Organic phosphoric acids and derivatives	1071-23-4	HMDB0000224	C00346	ko01100//Metabolic pathways;ko00564//Glycerophospholipid metabolism;ko00600//Sphingolipid metabolism;ko04071//Sphingolipid signaling pathway	Global and overview maps;Lipid metabolism;Signal transduction	Environmental Information Processing;Metabolism
M153T378_NEG	O,o-diethyl phosphate	377.839	153.017	3075.92	2454.7	2709.3	4050.48	6243.77	7283.68	5393.83	5068.98	5061.73	Organic phosphoric acids and derivatives	598-02-7	HMDB0012209	-	-	-	-
M283T612_NEG	Octadecanoic acid	611.918	283.263	12993.9	11019	5006.27	8391.36	9005.34	10352.9	12127.3	12561.7	12128.8	Fatty Acyls	1957-11-04	HMDB0000827	C01530	ko01040//Biosynthesis of unsaturated fatty acids;ko00061//Fatty acid biosynthesis;ko04745//Phototransduction - fly	Lipid metabolism;Sensory system	Metabolism;Organismal Systems
M455T37_NEG	Oleanolic acid	36.904	455.35	41965.1	1.0976e+06	1.26971e+06	359703	263378	250760	453639	453767	444964	Prenol lipids	508-02-1	HMDB0002364	-	-	-	-
M453T36_NEG	Oleanonic acid	36.282	453.335	27550.5	352371	927591	144427	139115	120045	385010	407545	385022	--	--	--	-	-	-	-
M281T108_NEG	Oleic acid	107.553	281.247	71420.8	662116	66859.3	61458.9	111296	84982.4	78111.6	78675.6	75859.2	Fatty Acyls	2027-47-6	HMDB0062703	C00712	ko01040//Biosynthesis of unsaturated fatty acids;ko00061//Fatty acid biosynthesis;ko04212//Longevity regulating pathway - worm	Aging;Lipid metabolism	Metabolism;Organismal Systems
M573T162_NEG	Oligomycin a	161.76	573.376	1480.22	10052.8	9823.38	18408.7	11825.4	9920.57	7847.42	7679.72	8013.93	--	--	--	-	-	-	-
M345T169_NEG	Oryzalin	168.643	345.09	14245.6	74608.1	111034	22259.5	49820.5	18946.5	48564.6	48565.6	50378.4	--	--	--	-	-	-	-
M297T27_2_NEG	Ostruthin	27.053	297.151	408186	273650	185887	507564	560656	359370	454009	449075	453977	--	--	--	-	-	-	-
M151T348_NEG	Oxypurinol	347.521	151.025	44538	11849.6	16193.1	15375.4	16854.2	16355	26268.9	26270.6	25954.3	Imidazopyrimidines	2465-59-0	HMDB0000786	-	-	-	-
M145T193_NEG	P-coumaric acid	193.112	145.04	8130.55	21707.9	22588	21269	19085.2	24330.4	19232	18112.7	19222.3	Cinnamic acids and derivatives	-	HMDB0128076	C00811	ko01100//Metabolic pathways;ko01110//Biosynthesis of secondary metabolites;ko00360//Phenylalanine metabolism;ko00350//Tyrosine metabolism;ko01220//Degradation of aromatic compounds;ko00130//Ubiquinone and other terpenoid-quinone biosynthesis	Amino acid metabolism;Global and overview maps;Metabolism of cofactors and vitamins	Metabolism
M335T91_NEG	Pachyrrhizin	91.098	335.079	11831.9	43778.7	41555.2	101249	49059.3	52766.1	39317.7	36302.7	39294.9	Isoflavonoids	10091-01-7	HMDB0034049	-	-	-	-
M221T385_NEG	Palatinose	385.17	221.066	4565.76	7575.12	20163.4	91728.2	112650	82932.8	57980.5	55356.7	55357.9	--	--	--	-	-	-	-
M255T46_NEG	Palmitic acid	46.2585	255.233	1.25318e+07	2.50619e+07	2.41859e+07	8.47344e+06	8.9646e+06	9.90562e+06	1.34578e+07	1.51445e+07	1.34468e+07	Fatty Acyls	1957-10-03	HMDB0000220	C00249	ko01100//Metabolic pathways;ko01040//Biosynthesis of unsaturated fatty acids;ko00061//Fatty acid biosynthesis;ko01212//Fatty acid metabolism;ko00071//Fatty acid degradation;ko00062//Fatty acid elongation	Global and overview maps;Lipid metabolism	Metabolism
M218T268_NEG	Pantothenate	267.863	218.103	355476	54812.2	172490	110443	135618	169152	224175	223383	223383	--	--	--	C00864	ko01100//Metabolic pathways;ko01110//Biosynthesis of secondary metabolites;ko04977//Vitamin digestion and absorption;ko00410//beta-Alanine metabolism;ko00770//Pantothenate and CoA biosynthesis	Digestive system;Global and overview maps;Metabolism of cofactors and vitamins;Metabolism of other amino acids	Metabolism;Organismal Systems
M803T141_NEG	Pc 33:2	141.077	802.558	40327.2	5168.8	21817	66045.8	79572.1	12123.7	26636.9	25960.7	25960.8	--	--	--	-	-	-	-
M831T138_NEG	Pc 35:2	137.751	830.588	75133.3	8684	22529	24701.4	29184.6	37970.5	45132.5	45680.6	45834.9	--	--	--	-	-	-	-
M855T135_NEG	Pc 37:4	135.257	854.59	58822.8	7509.01	9461.48	15811.5	21989.7	27749.1	43422.9	37213.6	43498.8	--	--	--	-	-	-	-
M867T55_NEG	Pc(16:0e/10-hdohe)	54.834	866.588	42442.3	8855.97	7944.42	7048.74	6504.69	6802.7	11385.7	10777.8	10787.8	--	--	--	-	-	-	-
M819T60_NEG	Pc(16:0e/13-hode)	60.3	818.588	565214	6320.31	16959.8	39442.7	93699.8	106654	47343.7	47342.2	48878	--	--	--	-	-	-	-
M841T136_NEG	Pc(16:0e/8-hepe)	135.684	840.573	362377	22344.3	62510.6	83754.3	112060	139308	212834	209263	209373	--	--	--	-	-	-	-
M865T134_NEG	Pc(16:1e/17-hdohe)	133.536	864.573	120873	8504.61	20935.5	35910.6	31403.1	37077.5	83581.2	81204.4	81082.6	--	--	--	-	-	-	-
M839T135_NEG	Pc(16:1e/8,9-epete)	135.407	838.558	96623.9	10181.5	19748	20987.3	33148.7	41014.2	65490.2	65480.3	66808.6	--	--	--	-	-	-	-
M817T138_NEG	Pc(16:1e/9-hode)	137.805	816.575	645008	32593.5	114304	280050	316717	354762	316664	312148	316817	--	--	--	-	-	-	-
M871T135_NEG	Pc(18:0e/8-hete)	134.763	870.616	111588	7305.88	14116.2	25131.1	51083.6	41057.7	49516.9	46283.4	49481.6	--	--	--	-	-	-	-
M845T109_NEG	Pc(18:1e/9-hode)	109.007	844.604	157539	9422.14	19229.6	58021.1	101492	104595	47654.5	47679.8	45618.6	--	--	--	-	-	-	-
M813T105_NEG	Pe 42:9	105.479	812.519	15179.7	26840	24588.9	34810.3	17440.6	11621.8	6655.97	6656.25	6926.49	--	--	--	-	-	-	-
M779T48_NEG	Pe(16:0/19,20-epdpe)	47.5795	778.514	37575	158275	76355.4	57046.1	44596	39769.4	16264.4	16263.7	16556.2	--	--	--	-	-	-	-
M779T141_NEG	Pe(16:0/7-hdohe)	140.606	778.502	16271.2	11464.4	14339.8	22986.1	9228.96	7326.15	29895.5	29891.5	28785.2	--	--	--	-	-	-	-
M752T34_NEG	Pe(16:0/8-hepe)	34.342	752.494	68789.2	40631.3	19023	23017.3	5142.37	8835.88	12056.9	12073.9	13310.5	--	--	--	-	-	-	-
M765T38_NEG	Pe(16:0e/10-hdohe)	37.66	764.522	645711	13222.9	37273.9	61986.9	101788	137208	137146	134021	137146	--	--	--	-	-	-	-
M763T136_NEG	Pe(16:1e/14-hdohe)	136.475	762.508	768319	12451.5	45314.4	83410.1	128217	211841	221609	215669	221622	--	--	--	-	-	-	-
M736T140_2_NEG	Pe(16:1e/14,15-epete)	139.791	736.491	363754	10948.8	18992.6	59512.1	69921.1	103452	85628.9	84663	84659.8	--	--	--	-	-	-	-
M783T198_NEG	Pe(18:0/14,15-eet)	197.719	782.516	10056.2	5251.38	9367.31	3806.7	3595.24	2366.58	2931.51	2813.32	2810.06	--	--	--	-	-	-	-
M781T35_NEG	Pe(18:0/18-hepe)	34.853	780.526	41038.1	213588	89680	90640.5	70551.7	56427.6	44815.5	43449.9	43456	--	--	--	-	-	-	-
M783T157_NEG	Pe(18:0/8-hete)	156.805	782.53	76824.6	5728.47	8599.65	11380.5	8312.47	17686.9	21183.3	20132.3	21120	--	--	--	-	-	-	-
M781T140_NEG	Pe(18:1/12-hete)	140.116	780.519	35567.1	10873.8	13893.8	7948.71	25895.8	20868.3	41136.8	42588.6	41012.4	--	--	--	-	-	-	-
M789T37_NEG	Pe(18:2e/7-hdohe)	37.153	788.524	409159	23471.6	42662	31105	34249.2	26307.7	65026.3	65179	59175.7	--	--	--	-	-	-	-
M241T47_1_NEG	Pentadecanoic acid	47.021	241.217	1.47474e+06	2.7626e+07	1.87846e+07	984847	832935	998562	1.13306e+07	1.06892e+07	1.06828e+07	Fatty Acyls	1002-84-2	HMDB0000826	-	-	-	-
M1176T30_NEG	Pentaerythritol tetrakis(3,5-di-tert-butyl-4-hydroxyhydrocinnamate)	29.66	1175.77	3491.75	3341.31	1649.36	1393.02	3240.62	1926.85	2181.87	2447.43	2185.93	--	--	--	-	-	-	-
M411T27_2_NEG	Pentanoic acid, 5-[(3ar,4r,5r,6as)-3,3-difluorohexahydro-5-hydroxy-4-[(1e,3s,4s)-3-hydroxy-4-methyl-1-nonen-6-ynyl]-2h-cyclopenta[b]furan-2-ylidene]-, (5z)-	27.484	411.219	16593.2	22462	38428.7	88603.3	87861.5	81826.6	80592.5	77402.2	80628.9	--	--	--	-	-	-	-
M743T35_2_NEG	Pg 34:3	35.264	743.486	235178	11747.8	24953.8	71104.6	80113.3	96772.4	77542	77183.3	77433.7	--	--	--	-	-	-	-
M767T36_NEG	Pg 36:5	35.513	767.486	247013	10804.5	20145.5	49281.6	79730.1	94604.4	74974.4	71489.5	74977.5	--	--	--	-	-	-	-
M794T35_NEG	Pg 38:6	34.928	793.502	827970	7932.19	29900.8	61657.8	100356	91633.7	128876	128876	129629	--	--	--	-	-	-	-
M822T189_NEG	Pg 40:6	189.02	821.517	12234.8	4759.21	4338.57	13388	15312.6	9289.6	7430.26	7437.49	6536.41	--	--	--	-	-	-	-
M818T35_1_NEG	Pg 40:8	34.928	817.503	883248	6332.93	34978.7	87707.5	121983	115961	137720	137710	134935	--	--	--	-	-	-	-
M842T34_1_NEG	Pg 42:10	34.487	841.503	266555	4067.01	25059.6	34857.7	35643.6	56157	55406.9	52293.2	52285.1	--	--	--	-	-	-	-
M844T69_NEG	Pg 42:9	68.9955	843.527	6272.13	11752.8	27239.9	60911	26853	27099.9	16436.5	16439.5	17022.3	--	--	--	-	-	-	-
M868T173_NEG	Pg 44:11	172.736	867.524	8878.28	34597.7	67621.3	11013.6	9997.17	10179.8	19031.9	16271.6	16265.7	--	--	--	-	-	-	-
M351T125_NEG	PGF3a	124.861	351.216	145851	720319	50856.7	35519.6	36360.3	43154.1	51257.9	45771.8	45037.2	Fatty Acyls	745-64-2	HMDB0002122	-	-	-	-
M320T126_NEG	Phe-arg	125.864	320.175	414.196	31905	6711.62	2487.2	2159.99	2380.87	2649.56	2688.41	2148.68	Carboxylic acids and derivatives	-	HMDB0028989	-	-	-	-
M597T238_NEG	Phe-met-arg-phe-amide	238.275	597.302	57638	11751.4	42454.5	28675.3	28922.4	29338.7	41968.7	41406	41406.7	--	--	--	-	-	-	-
M537T30_NEG	Phe(benzoyl)-leu-arg	29.51	537.292	113678	2.58891e+06	4.37827e+06	727300	757342	705421	253101	228004	253138	--	--	--	-	-	-	-
M192T177_NEG	Phenaceturic acid	176.602	192.066	56362.9	13300.9	17495.9	19158.1	27494	22571.2	34902.1	34013	34049.8	Carboxylic acids and derivatives	500-98-1	HMDB0000821	C05598	ko00360//Phenylalanine metabolism	Amino acid metabolism	Metabolism
M93T24_NEG	Phenol	24.3625	93.0345	38569.7	1091.94	1676.97	73691.2	68336.5	81030.6	33352.8	35654.1	36530.5	Benzene and substituted derivatives	87-66-1	HMDB0013674	-	-	-	-
M313T50_2_NEG	Phenol, 5-(1,1-dimethyloctyl)-2-[(1s,3s)-3-hydroxycyclohexyl]-	50.322	313.273	32953.5	102410	59343.3	28679.6	13314.1	25573.6	26539.2	27028.5	26539.8	--	--	--	-	-	-	-
M164T266_NEG	Phenylalanine	265.971	164.071	804037	153171	183045	31972.5	57912.5	65086.2	102751	98660.7	102779	Carboxylic acids and derivatives	63-91-2	HMDB0000159	-	-	-	-
M273T92_NEG	Phenylbenzimidazolesulfonic acid	92.065	273.043	14365.4	11447.7	16633.9	405222	245567	279563	174681	174632	165493	--	--	--	-	-	-	-
M422T422_NEG	Phenylethyl glucosinolate	422.121	422.058	2276.12	1580.48	854.471	765.785	1258.74	1898.05	1656.6	1552.44	1549.11	--	--	--	C08417	ko01110//Biosynthesis of secondary metabolites;ko01210//2-Oxocarboxylic acid metabolism	Global and overview maps	Metabolism
M433T35_NEG	Philanthotoxin 74	34.602	433.33	48464.7	46554.5	81809	132266	100852	100679	105194	105313	97463.5	--	--	--	-	-	-	-
M169T30_NEG	Phloroglucinolcarboxylic acid	30.4825	169.014	60642.6	73059.6	125223	870096	945767	786525	748306	748204	725964	Benzene and substituted derivatives	83-30-7	HMDB0029649	-	-	-	-
M540T188_NEG	Phosphatidylcholine lyso alkyl 16:0	188.133	540.364	45857.5	34222.9	28292.2	55818.4	88355.1	70754.9	61919.9	61936	59714	--	--	--	-	-	-	-
M683T42_NEG	Phosphonic acid, p-[(3r)-3-amino-4-[(3-hexylphenyl)amino]-4-oxobutyl]-	42.329	683.346	3788.63	921808	22417.4	14915.9	14084.2	15221.1	46491.5	40355.2	46377.4	--	--	--	-	-	-	-
M619T387_NEG	Phosphonic acid, p-[2-[3-[[(1-benzoyl-4-piperidinyl)methylamino]carbonyl]-2-naphthalenyl]-1-(1-naphthalenyl)-2-oxoethyl]-	386.834	619.188	788.641	427.626	1070.16	4873.91	4188.88	4134.53	2647.79	2676.66	2676.99	--	--	--	-	-	-	-
M311T37_NEG	Phytanic acid	37.382	311.294	366601	2.65961e+06	1.01448e+07	460661	353501	340074	1.49065e+06	1.48999e+06	1.41341e+06	Prenol lipids	14721-66-5	HMDB0000801	-	-	-	-
M834T188_NEG	Pi 34:2	188.4	833.518	248425	10472.6	32957.7	144284	163787	102511	36219.4	35810.9	36219	--	--	--	-	-	-	-
M848T188_NEG	Pi 35:2	187.68	847.533	43592.3	6464.82	11382.8	27605.5	37220	19407	7277.63	6609.86	7293.32	--	--	--	-	-	-	-
M858T186_NEG	Pi 36:4	185.613	857.517	394574	9746.67	53163.8	47824.6	72494.4	58416.3	57368.4	56367.8	57361.9	--	--	--	-	-	-	-
M856T185_NEG	Pi 36:5	185.387	855.502	67389	5810.45	8436.77	20014.7	17405.5	15229.1	17289.7	17175.8	23001.1	--	--	--	-	-	-	-
M872T184_NEG	Pi 37:4	184.19	871.532	98727	4812.02	12927.4	8541.41	15815.9	11927.5	12008.7	12021.5	12405.3	--	--	--	-	-	-	-
M870T185_NEG	Pi 37:5	185.381	869.519	20145.4	5323.77	9563.41	3605.61	7707.89	4651.01	5751.35	5401.2	5449.55	--	--	--	-	-	-	-
M884T183_NEG	Pi 38:5	183.492	883.533	2.16067e+06	21921.6	98911.2	138572	170019	185960	238221	238218	240225	--	--	--	-	-	-	-
M882T183_NEG	Pi 38:6	183.476	881.517	289632	5294.18	20025.4	18547.1	25947.8	32653.3	60316.5	63771	60371.6	--	--	--	-	-	-	-
M880T184_NEG	Pi 38:7	183.893	879.501	24629.4	2939.2	4881.28	3640.23	3997.53	5715.32	8599.13	8096.29	8191.4	--	--	--	-	-	-	-
M910T183_1_NEG	Pi 40:6	182.588	909.547	107145	4163.83	12010.5	10766.7	15751.4	11627.4	19952.6	19018.1	19010.6	--	--	--	-	-	-	-
M908T182_NEG	Pi 40:7	182.244	907.532	35622.4	3668.32	6331.19	1915.08	4587.8	7899.26	12407.4	12286.6	13218.5	--	--	--	-	-	-	-
M860T187_1_NEG	Pi(16:0e/15-hete)	186.803	859.533	458578	13664.8	55376	210926	219761	155658	97600.1	81682.9	97386.3	--	--	--	-	-	-	-
M847T193_NEG	Pi(16:1/13-hode)	192.726	847.476	34631.7	9529.53	3796.31	26513.6	25058.3	17192	7529.34	6181.24	6181.6	--	--	--	-	-	-	-
M900T34_1_NEG	Pi(18:0/12-hepe)	33.756	899.536	7101.8	5912.12	13835.8	17220.3	19967.5	17635.7	11779.5	9641.52	11691.3	--	--	--	-	-	-	-
M900T189_NEG	Pi(18:0/18-hepe)	188.862	899.522	10865.6	3191.54	6389.64	6847.05	6324.8	4690.8	6522.63	7278.7	7302.27	--	--	--	-	-	-	-
M159T432_NEG	Pimelic acid	432.287	159.066	2766.91	1531.92	2288.9	4085.26	4431.55	4937.11	6503.34	6057.74	6039.22	Fatty Acyls	111-16-0	HMDB0000857	C02656	ko01100//Metabolic pathways;ko00780//Biotin metabolism	Global and overview maps;Metabolism of cofactors and vitamins	Metabolism
M217T58_NEG	Ponceau 6	58.02	217.016	12628.9	16197.2	30966.8	46070.9	57680.8	41575.8	41615.2	41612.3	42109.5	--	--	--	-	-	-	-
M497T23_NEG	Poricoic acid a	23.1225	497.327	45201.5	106020	75511.8	84483.9	194525	21586.3	100631	123018	100112	--	--	--	-	-	-	-
M225T374_NEG	Porphobilinogen	374.277	225.073	1148.26	781.453	1885.69	894.068	1821.76	1751.43	2209.35	2057.09	2058.63	Organonitrogen compounds	487-90-1	HMDB0000245	C00931	ko01100//Metabolic pathways;ko01110//Biosynthesis of secondary metabolites;ko01120//Microbial metabolism in diverse environments;ko00860//Porphyrin and chlorophyll metabolism	Global and overview maps;Metabolism of cofactors and vitamins	Metabolism
M297T36_2_NEG	Pristanic acid	36.483	297.278	115024	121422	92800.3	101928	104800	87268.5	92225.4	84235.1	82619.8	Prenol lipids	1189-37-3	HMDB0000795	-	-	-	-
M463T25_1_NEG	Pristimerin	25.001	463.286	265585	3.22407e+06	1.0003e+06	544755	433510	604468	878801	878859	892230	--	--	--	-	-	-	-
M245T415_NEG	Pro-met	414.657	245.103	3591.23	13892.9	49623.2	8568.14	9117.1	9613.98	10573.7	10345.2	10337.9	Carboxylic acids and derivatives	-	HMDB0029023	-	-	-	-
M515T26_NEG	Probucol	26.292	515.302	9313.01	13387.2	15831.4	183466	59286.7	63397.8	77279.8	61346.2	59064.8	Benzene and substituted derivatives	23288-49-5	HMDB0015537	-	-	-	-
M336T126_NEG	Propanoic acid, 2-[[4-[2-[[[(2,4-difluorophenyl)amino]carbonyl]heptylamino]ethyl]phenyl]thio]-2-methyl-	125.737	336.22	3013.56	115005	9443.93	6704.91	7087.99	6516.63	14647.4	14495.1	14993.9	--	--	--	-	-	-	-
M295T489_NEG	Propanoic acid, 3-[[[2-[(aminoiminomethyl)amino]-4-thiazolyl]methyl]thio]-	488.871	294.993	266592	460226	548821	816215	748107	818369	448475	455717	275387	--	--	--	-	-	-	-
M73T176_2_NEG	Propionic acid	176.233	73.0293	404191	493811	612103	611270	577520	582542	530806	483035	531422	Carboxylic acids and derivatives	1979-09-04	HMDB0000237	C00163	ko01100//Metabolic pathways;ko01120//Microbial metabolism in diverse environments;ko04974//Protein digestion and absorption;ko01220//Degradation of aromatic compounds;ko00760//Nicotinate and nicotinamide metabolism;ko00640//Propanoate metabolism;ko04973//Carbohydrate digestion and absorption	Carbohydrate metabolism;Digestive system;Global and overview maps;Metabolism of cofactors and vitamins	Metabolism;Organismal Systems
M130T386_NEG	Propionylglycine	386.458	130.05	31670.4	3507.85	5820.87	4273.87	4435.54	8784.35	11785.6	11785.8	11726.3	Carboxylic acids and derivatives	21709-90-0	HMDB0000783	-	-	-	-
M335T64_NEG	Prostaglandin d1	64.2085	335.222	29008.6	73885.7	69741.2	128393	78158.6	33815.5	54000.8	53768.5	60324.4	Fatty Acyls	17968-82-0	HMDB0005102	-	-	-	-
M707T80_NEG	Prostaglandin e1	80.411	707.486	57659.2	787484	888525	281818	167814	119706	75437.6	65956.2	65991.2	Fatty Acyls	745-65-3	HMDB0001442	-	-	-	-
M367T54_3_NEG	Prostaglandin g2	54.2825	367.213	74575.2	234448	57888.6	26371.8	35840.9	39526.4	54587.7	53933.5	54600.4	Fatty Acyls	51982-36-6	HMDB0003235	C05956	ko01100//Metabolic pathways;ko00590//Arachidonic acid metabolism;ko04611//Platelet activation;ko04726//Serotonergic synapse	Global and overview maps;Immune system;Lipid metabolism;Nervous system	Metabolism;Organismal Systems
M833T182_NEG	Ps 40:7	181.961	832.51	55950.8	2509.59	4487.52	4635.25	5796.6	5488.88	8367.17	8367.15	8357.46	--	--	--	-	-	-	-
M243T236_NEG	Pseudouridine	235.815	243.062	53718.9	6041.83	17431.4	21966.5	28253	27562.9	34814	34814.4	35815.8	Nucleoside and nucleotide analogues	1445-07-4	HMDB0000767	C02067	ko00240//Pyrimidine metabolism	Nucleotide metabolism	Metabolism
M255T28_2_NEG	Pterostilbene	28.355	255.104	3537.41	10726.8	11579.6	1181.76	2822.78	10134.4	5797.74	8426.26	5937.85	--	--	--	-	-	-	-
M749T197_NEG	Pulchinenoside a	197.139	749.446	2433.13	42219.9	3481.39	1401.52	1866.17	1572.4	5820.1	5685.53	5709.66	--	--	--	-	-	-	-
M511T389_NEG	Pumiloside	389.427	511.174	1388.86	1333.13	2841.51	4506.61	7403.13	5274.14	5218.19	5180.11	5218.11	--	--	--	-	-	-	-
M143T191_NEG	Pyruvaldehyde	190.666	143.034	2460.78	4241.86	4798.49	7167	4731.97	10527.8	6052.01	6148.35	6052.31	Organooxygen compounds	78-98-8	HMDB0001167	C00546	ko01120//Microbial metabolism in diverse environments;ko00260//Glycine, serine and threonine metabolism;ko00640//Propanoate metabolism;ko00620//Pyruvate metabolism	Amino acid metabolism;Carbohydrate metabolism;Global and overview maps	Metabolism
M87T119_NEG	Pyruvate	119.423	87.0453	694531	861701	4.1396e+06	2.831e+06	2.82706e+06	3.09477e+06	2.89691e+06	2.89695e+06	2.86913e+06	Keto acids and derivatives	127-17-3	HMDB0000243	C00022	ko01100//Metabolic pathways;ko01110//Biosynthesis of secondary metabolites;ko01120//Microbial metabolism in diverse environments;ko01130//Biosynthesis of antibiotics;ko01230//Biosynthesis of amino acids;ko01210//2-Oxocarboxylic acid metabolism;ko05230//Central carbon metabolism in cancer;ko00330//Arginine and proline metabolism;ko01200//Carbon metabolism;ko00270//Cysteine and methionine metabolis…	Amino acid metabolism;Biosynthesis of other secondary metabolites;Cancers;Carbohydrate metabolism;Endocrine and metabolic diseases;Endocrine system;Global and overview maps;Metabolism of cofactors and vitamins;Metabolism of other amino acids;Metabolism of terpenoids and polyketides;Signal transduction	Environmental Information Processing;Human Diseases;Metabolism;Organismal Systems
M603T443_NEG	Quercetin	443.107	603.085	403.621	280.296	259.187	410.026	1041.5	876.919	2554.99	2546.11	2672.71	Flavonoids	117-39-5	HMDB0005794	C00389	ko01100//Metabolic pathways;ko01110//Biosynthesis of secondary metabolites;ko04152//AMPK signaling pathway	Global and overview maps;Signal transduction	Environmental Information Processing;Metabolism
M463T252_NEG	Quercetin 3-glucoside	252.491	463.107	910.617	1603.37	2948.45	8363.03	8009.33	8140.54	10891.1	10725.3	10727.6	Flavonoids	482-35-9	HMDB0037362	C05623	ko01100//Metabolic pathways;ko01110//Biosynthesis of secondary metabolites	Global and overview maps	Metabolism
M755T431_NEG	Quercetin 3-o-[2''-o-(6'''-o-p-coumaroyl)-b-d-glucopyranosyl]-a-l-rhamnopyranoside	430.936	755.199	880.606	186.991	527.79	1038.85	661.02	641.745	946.485	985.486	948.227	--	--	--	-	-	-	-
M329T37_1_NEG	Quercetin 3,7-dimethyl ether	37.153	329.066	7097.9	65261.2	43409	277445	298532	175071	233638	222151	233259	Flavonoids	2068-02-02	HMDB0029263	-	-	-	-
M485T101_2_NEG	Quillaic acid	101.126	485.326	110045	3.47332e+06	4.96178e+06	1.90953e+06	1.79905e+06	1.52503e+06	1.34158e+06	1.33171e+06	1.33153e+06	--	--	--	-	-	-	-
M191T343_NEG	Quinate	343.021	191.055	16537.9	17227.9	68545.9	132626	49783.3	47624	57343.9	63882.3	62872.8	Quinolines and derivatives	91-63-4	HMDB0042004	C00296	ko00400//Phenylalanine, tyrosine and tryptophan biosynthesis	Amino acid metabolism	Metabolism
M353T28_2_NEG	Rauwolscine	27.745	353.177	257269	203249	201067	272058	255539	219043	279452	272397	279369	Yohimbine alkaloids	146-48-5	HMDB0015464	-	-	-	-
M641T255_NEG	Rebaudioside b	255.119	641.338	180.116	22774.2	7515.07	505.592	86.336	412.611	3656.84	3480.03	3484.86	Prenol lipids	58543-17-2	HMDB0034949	-	-	-	-
M257T140_NEG	Ribothymidine	139.768	257.079	102008	140922	153873	109844	70243.6	211710	99065.6	93883.5	99018.6	Pyrimidine nucleosides	1463-10-1	HMDB0000884	-	-	-	-
M297T53_NEG	Ricinoleic acid	53.452	297.242	254313	3.30508e+06	1.04439e+06	370385	310888	346001	779728	655808	653081	Fatty Acyls	141-22-0	HMDB0034297	-	-	-	-
M439T104_NEG	Roburic acid	104.135	439.377	6335.37	52639.2	14573	10194.7	9223.24	9867.95	12965.6	12343.7	12338.4	--	--	--	-	-	-	-
M609T254_NEG	Rutin	253.762	609.143	843.908	1210.54	4466.67	11571.6	2006.02	6041.09	3551.16	3550.09	3660.82	Flavonoids	153-18-4	HMDB0003249	C05625	ko01100//Metabolic pathways;ko01110//Biosynthesis of secondary metabolites	Global and overview maps	Metabolism
M174T76_NEG	S-(2-boronoethyl)-l-cysteine	76.427	174.019	12019.9	28088.1	52292	2443.88	2921.16	2434.41	8342.38	7920.44	9942.2	--	--	--	-	-	-	-
M137T41_NEG	Salicylic acid	40.826	137.024	79487.4	22358.1	43029.1	113495	222364	94204.9	104695	105377	95399.7	Benzene and substituted derivatives	69-72-7	HMDB0001895	C00805	ko01100//Metabolic pathways;ko01110//Biosynthesis of secondary metabolites;ko01120//Microbial metabolism in diverse environments;ko01130//Biosynthesis of antibiotics;ko04976//Bile secretion;ko00360//Phenylalanine metabolism;ko01220//Degradation of aromatic compounds	Amino acid metabolism;Digestive system;Global and overview maps	Metabolism;Organismal Systems
M627T423_NEG	Salicylic acid .beta.-d-o-glucuronide	423.071	627.118	852.262	355.948	430.25	620.809	405.341	635.158	2314.48	2094.29	2080.65	--	--	--	-	-	-	-
M299T300_NEG	Salidroside	300.199	299.09	1279.54	2818.79	5109.75	2951.41	1585.09	4222.05	3035.46	2940.43	2963.14	--	--	--	C06046	ko00350//Tyrosine metabolism	Amino acid metabolism	Metabolism
M593T349_NEG	Saponarin	349.069	593.149	3666.55	5761.77	21135.4	34653.8	20152.3	13769.1	27831	27152.1	27156.6	--	--	--	-	-	-	-
M563T339_NEG	Schaftoside	339.26	563.138	6998.26	5225.19	39406.8	37459.4	22604.6	20630.5	28166.1	28169.1	27459.1	--	--	--	-	-	-	-
M201T322_NEG	Sebacic acid	322.469	201.113	27804.6	58887.3	73307.6	99842.1	74358.2	98968.8	76542.9	76540.1	76105.1	Fatty Acyls	111-20-6	HMDB0000792	-	-	-	-
M289T457_NEG	Sedoheptulose 7-phosphate	457.317	289.031	57471.1	7182.3	3637.34	18078.5	1179.24	3910.22	15185.1	15176.2	14330.7	Organic oxygen compounds	-	HMDB0062754	C05382	ko01100//Metabolic pathways;ko01110//Biosynthesis of secondary metabolites;ko01120//Microbial metabolism in diverse environments;ko01130//Biosynthesis of antibiotics;ko01230//Biosynthesis of amino acids;ko01200//Carbon metabolism;ko00030//Pentose phosphate pathway	Carbohydrate metabolism;Global and overview maps	Metabolism
M535T27_2_NEG	Senegenin	27.053	535.307	200197	2.74884e+06	1.74328e+06	618262	625372	547151	1.26883e+06	1.24744e+06	1.26887e+06	--	--	--	-	-	-	-
M499T33_1_NEG	Silydianin	33.169	499.125	174521	33372.9	75294.2	1.0271e+06	816893	1.67287e+06	817267	823559	823619	--	--	--	-	-	-	-
M706T176_NEG	Sm d30:1	176.254	705.518	4144.97	1185.35	2444	753.782	749.467	1421.91	1840.48	1745.78	1743.99	--	--	--	-	-	-	-
M748T174_NEG	Sm d33:1	174.333	747.563	11721.7	2060.69	1646.6	871.512	2950.09	2863.06	2423.53	2515.53	2418.27	--	--	--	-	-	-	-
M762T149_NEG	Sm d34:1	148.521	761.579	207206	7100.98	6859.32	14832.5	29107.8	36884.6	23938.2	23198.9	23219.6	--	--	--	-	-	-	-
M760T139_NEG	Sm d34:2	139.074	759.567	18848.2	3286.89	6052.75	13879.1	10091.4	15525.3	8574.53	11259.8	11342.8	--	--	--	-	-	-	-
M214T387_NEG	sn-Glycerol 3-phosphoethanolamine	386.696	214.048	80615.1	13520.1	33591.3	45423.4	179466	143264	331573	332840	328003	--	--	--	C01233	ko00564//Glycerophospholipid metabolism;ko00565//Ether lipid metabolism	Lipid metabolism	Metabolism
M261T298_NEG	Sorbitol 6-phosphate	298.05	261.028	495.268	818.429	1516.98	2977.13	2285.83	3147.88	2185.99	2098.13	2096.92	Organooxygen compounds	20479-58-7	HMDB0005831	C01096	ko00051//Fructose and mannose metabolism	Carbohydrate metabolism	Metabolism
M927T302_NEG	Soyasapogenol b base + o-hexa-hex-pen	302.469	927.489	16.7387	4215.67	833.116	110.352	68.7835	413.714	665.983	696.944	723.501	--	--	--	-	-	-	-
M765T223_NEG	Soyasapogenol b base + o-hexa-pen	222.584	765.439	1366.78	59865.1	3222.58	830.102	570.449	545.963	4453.2	4454.29	4202.45	--	--	--	-	-	-	-
M665T452_NEG	Stachyose	451.537	665.216	1767.57	728.417	692.743	2934.18	4819.4	3991.8	2096.86	2271.38	2269.53	Organooxygen compounds	470-55-3	HMDB0003553	C01613	ko00052//Galactose metabolism	Carbohydrate metabolism	Metabolism
M283T68_NEG	Stearic acid	67.5985	283.263	835726	1.67161e+06	552353	308028	343814	302976	565046	564541	590764	Fatty Acyls	1957-11-04	HMDB0000827	C01530	ko01040//Biosynthesis of unsaturated fatty acids;ko00061//Fatty acid biosynthesis;ko04745//Phototransduction - fly	Lipid metabolism;Sensory system	Metabolism;Organismal Systems
M275T47_NEG	Stearidonic acid	46.54	275.2	14848.6	103676	45786.3	8635.17	10479.7	10256.1	31683.6	31686.1	31339.6	Fatty Acyls	20290-75-9	HMDB0006547	C16300	ko01110//Biosynthesis of secondary metabolites;ko00592//alpha-Linolenic acid metabolism	Global and overview maps;Lipid metabolism	Metabolism
M243T402_NEG	Suberosin	401.721	243.087	4306.85	1234.33	1558.66	1108.51	1676.65	2851.93	2141.44	2332.5	2358.82	--	--	--	-	-	-	-
M117T382_NEG	Succinate	381.519	117.019	64404.7	57677.5	70124.3	79674.2	62276.2	66402.5	105949	104085	104542	Carboxylic acids and derivatives	110-15-6	HMDB0000254	C00042	ko01100//Metabolic pathways;ko01110//Biosynthesis of secondary metabolites;ko01120//Microbial metabolism in diverse environments;ko01130//Biosynthesis of antibiotics;ko05230//Central carbon metabolism in cancer;ko01200//Carbon metabolism;ko00360//Phenylalanine metabolism;ko00350//Tyrosine metabolism;ko00250//Alanine, aspartate and glutamate metabolism;ko01220//Degradation of aromatic compounds;ko…	Amino acid metabolism;Cancers;Carbohydrate metabolism;Endocrine system;Energy metabolism;Global and overview maps;Metabolism of cofactors and vitamins;Nervous system;Signal transduction	Environmental Information Processing;Human Diseases;Metabolism;Organismal Systems
M139T308_NEG	Sulfoacetic acid	308.478	138.97	38792.5	953.092	4135.52	9941.13	8267.66	12948.1	8149.6	8150.23	7632.15	--	--	--	C14179	ko00430//Taurine and hypotaurine metabolism	Metabolism of other amino acids	Metabolism
M574T30_3_NEG	Sulfobacin b	30.003	574.45	6.80387e+06	1.24426e+08	6.78408e+07	1.58674e+06	1.05629e+06	766406	2.46002e+07	2.53045e+07	2.53015e+07	--	--	--	-	-	-	-
M473T417_NEG	Suxibuzone	417.135	473.149	1438.13	1898.12	1298.98	10179.4	5973.14	11891.6	7391.39	7275.92	7276.71	Fatty Acyls	27470-51-5	HMDB0042019	-	-	-	-
M119T346_NEG	Tartronate	345.932	119.017	18252.2	18516.2	20124.7	48800.9	72020.3	39528.6	39271.9	39270	39493.2	Carboxylic acids and derivatives	80-69-3	HMDB0035227	-	-	-	-
M257T239_NEG	Tetradecanedioic acid	239.176	257.174	21272	29020.1	33683.9	68815.2	63608.7	85148	63060.6	63594	63060.4	Fatty Acyls	821-38-5	HMDB0000872	-	-	-	-
M349T62_NEG	Tetrahydrocorticosterone	61.566	349.236	14752.3	55980.2	61734.5	105395	83139.8	81439.1	53624.8	51079.8	51099.7	Steroids and steroid derivatives	68-42-8	HMDB0000268	C05476	ko00140//Steroid hormone biosynthesis	Lipid metabolism	Metabolism
M269T225_NEG	Tetrahydromagnolol	224.826	269.174	2700.87	3074.85	3081.72	17548.8	11537	17064.8	12867	13568.8	12864.5	--	--	--	-	-	-	-
M344T462_NEG	Thiamine monophosphate	461.635	344.069	1301.13	1368.31	1396.16	1580.7	1248.57	1743.01	2018.41	2021.07	1943.74	Diazines	495-23-8	HMDB0002666	C01081	ko01100//Metabolic pathways;ko00730//Thiamine metabolism	Global and overview maps;Metabolism of cofactors and vitamins	Metabolism
M219T315_NEG	Thr-Thr	315.028	219.098	2138.45	20867.5	27456.9	4527.6	3795.2	4533.17	5112.21	4903.94	5114.84	Carboxylic acids and derivatives	-	HMDB0029071	-	-	-	-
M241T125_NEG	Thymidine	125.333	241.085	107431	100235	103510	70366.7	73024.9	73406.5	86152.8	85574.1	85578	Pyrimidine nucleosides	50-89-5	HMDB0000273	C00214	ko01100//Metabolic pathways;ko00240//Pyrimidine metabolism	Global and overview maps;Nucleotide metabolism	Metabolism
M311T27_NEG	Thymol-beta-d-glucoside	26.804	311.168	1.81499e+06	1.08623e+06	664015	1.79137e+06	2.53344e+06	1.25113e+06	1.82947e+06	1.82961e+06	1.76544e+06	--	--	--	-	-	-	-
M193T200_NEG	Trans-cinnamic acid	199.952	193.05	1433.3	28329.7	19200.6	44485.1	12631.5	29153.1	33726.5	33719.1	30408.3	Cinnamic acids and derivatives	140-10-3	HMDB0000930	C00423	ko01100//Metabolic pathways;ko01110//Biosynthesis of secondary metabolites;ko01120//Microbial metabolism in diverse environments;ko00360//Phenylalanine metabolism;ko01220//Degradation of aromatic compounds;ko00130//Ubiquinone and other terpenoid-quinone biosynthesis	Amino acid metabolism;Global and overview maps;Metabolism of cofactors and vitamins	Metabolism
M341T358_NEG	Trehalose	358.334	341.107	27953.9	26891.9	26718.6	67713.2	76449.9	58993.3	57816.3	57279.5	57280.5	Organooxygen compounds	99-20-7	HMDB0000975	C01083	ko01100//Metabolic pathways;ko01110//Biosynthesis of secondary metabolites;ko02010//ABC transporters;ko00500//Starch and sucrose metabolism	Carbohydrate metabolism;Global and overview maps;Membrane transport	Environmental Information Processing;Metabolism
M353T36_NEG	Tricosanoic acid	35.6255	353.34	104371	12438.8	28908.4	63895.2	31426.9	56732.9	26666.5	26641.3	25542.1	Fatty Acyls	2433-96-7	HMDB0001160	-	-	-	-
M227T166_NEG	Trifluoroacetic acid	165.637	226.995	626580	10203.7	61182	7270.25	16023.1	6951.67	9116.06	8950.03	8949.48	Carboxylic acids and derivatives	1976-05-01	HMDB0014118	-	-	-	-
M209T439_NEG	Trimellitic acid anhydride	438.776	209.008	4684.73	6946.8	13957.5	10729.3	5858.44	13574	13166.8	13116	13167.4	--	--	--	-	-	-	-
M306T435_NEG	Trp-Cys	435.061	306.048	7852	1398.47	2291.74	1503.5	1694.94	1827.69	3283.53	3509.14	3283.5	Carboxylic acids and derivatives	-	HMDB0029080	C00239	ko01100//Metabolic pathways;ko00240//Pyrimidine metabolism	Global and overview maps;Nucleotide metabolism	Metabolism
M565T436_NEG	Udp-d-glucose	436.393	565.044	18676.2	1201.53	1393.22	1294.68	634.97	1024.15	6234.08	6153.69	6234.75	Pyrimidine nucleotides	-	HMDB0060079	C00029	ko01100//Metabolic pathways;ko01130//Biosynthesis of antibiotics;ko00520//Amino sugar and nucleotide sugar metabolism;ko00240//Pyrimidine metabolism;ko00053//Ascorbate and aldarate metabolism;ko00052//Galactose metabolism;ko00500//Starch and sucrose metabolism;ko00040//Pentose and glucuronate interconversions;ko00524//Neomycin, kanamycin and gentamicin biosynthesis;ko00561//Glycerolipid metabolism	Biosynthesis of other secondary metabolites;Carbohydrate metabolism;Global and overview maps;Lipid metabolism;Nucleotide metabolism	Metabolism
M606T424_NEG	Udp-n-acetylglucosamine	423.816	606.073	56294.9	3289.29	5665.44	3851.01	7056.44	7391.26	40817.8	40816.9	41561.5	Pyrimidine nucleotides	528-04-1	HMDB0000290	C00043	ko01100//Metabolic pathways;ko01130//Biosynthesis of antibiotics;ko00520//Amino sugar and nucleotide sugar metabolism;ko04931//Insulin resistance;ko00524//Neomycin, kanamycin and gentamicin biosynthesis	Biosynthesis of other secondary metabolites;Carbohydrate metabolism;Endocrine and metabolic diseases;Global and overview maps	Human Diseases;Metabolism
M535T428_NEG	Udp-xylose	428.289	535.036	3251.71	169.454	151.267	50.7493	351.002	195.615	933.444	933.058	783.5	--	--	--	C00190	ko01100//Metabolic pathways;ko00520//Amino sugar and nucleotide sugar metabolism	Carbohydrate metabolism;Global and overview maps	Metabolism
M167T195_NEG	Uric acid	194.857	167.02	145041	15459.6	7843.15	15223.1	14269.7	9085.43	21568.6	22677.1	22642.4	Imidazopyrimidines	69-93-2	HMDB0000289	C00366	ko01100//Metabolic pathways;ko01120//Microbial metabolism in diverse environments;ko00230//Purine metabolism;ko04976//Bile secretion	Digestive system;Global and overview maps;Nucleotide metabolism	Metabolism;Organismal Systems
M243T159_NEG	Uridine	159.4	243.062	1.14172e+07	141793	675207	2.13783e+06	3.34514e+06	3.79934e+06	5.26331e+06	4.95924e+06	5.26223e+06	Pyrimidine nucleosides	58-96-8	HMDB0000296	C00299	ko01100//Metabolic pathways;ko00240//Pyrimidine metabolism	Global and overview maps;Nucleotide metabolism	Metabolism
M579T469_NEG	Uridine 5'-diphosphoglucuronic acid (UDP-D-glucuronate)	468.905	579.024	4624.88	204.792	1073.13	129.884	373.079	322.065	1910.03	1914.14	2080.03	--	--	--	-	-	-	-
M323T434_NEG	Uridine 5'-monophosphate	433.664	323.027	7499.18	1224.57	5167.34	3032.31	4556.26	4635.16	12811.6	12717.3	12811.6	Pyrimidine nucleotides	58-97-9	HMDB0000288	C00105	ko01100//Metabolic pathways;ko00240//Pyrimidine metabolism	Global and overview maps;Nucleotide metabolism	Metabolism
M233T40_NEG	Valerenic acid	39.9915	233.154	37150	10130.4	15233.1	22110.8	19810.6	17166.4	20174.5	20781.6	20179.6	Prenol lipids	3569-10-06	HMDB0030016	-	-	-	-
M101T102_2_NEG	Valeric acid	101.947	101.061	394516	7.26343e+06	8.91044e+06	6.88597e+06	6.672e+06	6.50429e+06	4.41298e+06	4.29984e+06	4.29072e+06	Fatty Acyls	109-52-4	HMDB0000892	-	-	-	-
M167T229_NEG	Vanillic acid	228.676	167.034	9684.38	3108.89	5309.38	48020.7	30001.4	32859.2	32018.8	31419	32024.5	Benzene and substituted derivatives	3943-74-6	HMDB0240266	C06672	ko01120//Microbial metabolism in diverse environments	Global and overview maps	Metabolism
M823T328_NEG	Vincristine	327.683	823.409	810.546	44.2516	207.776	428.002	80.6213	802.279	600.537	617.673	582.173	Vinca alkaloids	57-22-7	HMDB0014681	C07204	ko01110//Biosynthesis of secondary metabolites	Global and overview maps	Metabolism
M115T367_NEG	Vitamin c	367.474	115.003	25926.7	3135.01	8941.36	8606.24	6112.36	20307.9	10198.6	10092.5	10197.8	Dihydrofurans	50-81-7	HMDB0000044	C00072	ko01100//Metabolic pathways;ko01110//Biosynthesis of secondary metabolites;ko01120//Microbial metabolism in diverse environments;ko00053//Ascorbate and aldarate metabolism;ko00480//Glutathione metabolism;ko04977//Vitamin digestion and absorption;ko04066//HIF-1 signaling pathway	Carbohydrate metabolism;Digestive system;Global and overview maps;Metabolism of other amino acids;Signal transduction	Environmental Information Processing;Metabolism;Organismal Systems
M449T172_NEG	Vitamin k1	171.959	449.325	13684	74545.7	70944.6	174998	147207	178294	91840.7	92045.1	80436.7	Prenol lipids	84-80-0	HMDB0015157	C02059	ko01100//Metabolic pathways;ko01110//Biosynthesis of secondary metabolites;ko04977//Vitamin digestion and absorption;ko00130//Ubiquinone and other terpenoid-quinone biosynthesis	Digestive system;Global and overview maps;Metabolism of cofactors and vitamins	Metabolism;Organismal Systems
M431T196_NEG	Vitexin	195.581	431.095	2533.36	4890.86	14833.7	23275.3	11902.9	7823.06	18144.8	16718.9	18157.5	--	--	--	-	-	-	-
M151T210_2_NEG	Xanthine	209.937	151.026	715041	81245	135854	136857	106088	121040	272791	272841	265432	Imidazopyrimidines	69-89-6	HMDB0000292	C00385	ko01100//Metabolic pathways;ko01110//Biosynthesis of secondary metabolites;ko01120//Microbial metabolism in diverse environments;ko00230//Purine metabolism;ko00232//Caffeine metabolism	Biosynthesis of other secondary metabolites;Global and overview maps;Nucleotide metabolism	Metabolism
M283T304_NEG	Xanthosine	304.441	283.067	99065.2	7301.87	9967.57	10726.4	6995.69	11966.3	20143.1	18657.9	18629.3	Purine nucleosides	146-80-5	HMDB0000299	C01762	ko01100//Metabolic pathways;ko01110//Biosynthesis of secondary metabolites;ko00230//Purine metabolism;ko00232//Caffeine metabolism	Biosynthesis of other secondary metabolites;Global and overview maps;Nucleotide metabolism	Metabolism
M265T25_NEG	Zinniol	24.825	265.147	576952	387187	216625	866244	835800	590684	721330	734579	721601	--	--	--	-	-	-	-
M507T25_NEG	--	25.48	507.313	486775	5.65963e+07	1.20077e+08	2.13689e+06	2.0007e+06	2.03456e+06	3.04432e+07	3.04432e+07	3.05011e+07	--	--	--	-	-	-	-
M351T35_NEG	--	34.544	351.22	833210	1.39099e+08	1.23989e+07	2.14712e+06	1.80212e+06	1.46198e+06	2.01924e+07	1.99835e+07	2.01928e+07	--	--	--	-	-	-	-
M616T30_NEG	--	30.179	616.462	6.58137e+06	1.15567e+08	1.09565e+08	3.74902e+06	1.88529e+06	1.48446e+06	1.32346e+07	1.2859e+07	1.32309e+07	--	--	--	-	-	-	-
M505T24_2_NEG	--	24.4635	505.331	209733	1.50955e+07	3.98257e+07	344288	202772	294621	8.35493e+06	8.35634e+06	8.46293e+06	--	--	--	-	-	-	-
M505T26_NEG	--	26.134	505.298	72646.7	1.59131e+07	4.24469e+07	244142	261035	165382	8.56334e+06	8.80894e+06	8.8079e+06	--	--	--	-	-	-	-
M465T34_1_NEG	--	34.3445	465.262	8243.35	2.04252e+07	35782.6	679338	513540	10455.7	1.25202e+06	1.36547e+06	1.30512e+06	--	--	--	-	-	-	-
M187T25_NEG	--	24.693	187.007	2.47903e+07	327906	684347	8.57484e+06	5.67172e+06	7.77596e+06	7.04264e+06	6.99604e+06	6.99622e+06	--	--	--	-	-	-	-
M617T31_2_NEG	--	30.503	617.465	2.15466e+06	3.64722e+07	3.49579e+07	1.18352e+06	902808	638416	4.43344e+06	4.24288e+06	4.43258e+06	--	--	--	-	-	-	-
M575T25_2_NEG	--	25.3815	575.434	1.68078e+06	5.16357e+06	2.11558e+07	7.21401e+06	4.94466e+06	3.01417e+06	2.83228e+06	2.8322e+06	2.8594e+06	--	--	--	-	-	-	-
M259T28_NEG	--	27.9225	259.028	418046	30116.8	156576	1.56811e+07	1.06119e+06	3.64817e+06	4.8861e+06	4.88609e+06	4.86212e+06	--	--	--	-	-	-	-
M630T30_NEG	--	30.16	630.477	975546	1.7777e+07	2.38374e+07	5.32738e+06	2.74275e+06	1.47625e+06	1.62695e+06	1.62663e+06	1.67557e+06	--	--	--	-	-	-	-
M589T25_NEG	--	25.293	589.449	955214	4.96309e+06	1.59304e+07	7.53658e+06	3.84131e+06	2.35975e+06	1.81678e+06	1.81594e+06	1.85345e+06	--	--	--	-	-	-	-
M395T25_2_NEG	--	25.0755	395.006	379313	14185.4	206929	1.59188e+07	1.89997e+06	7.41004e+06	2.90635e+06	2.97404e+06	2.90659e+06	--	--	--	-	-	-	-
M269T54_NEG	--	53.5315	269.212	40290	1.32943e+07	259573	133455	78484.4	148038	123337	120983	119122	--	--	--	-	-	-	-
M352T34_2_NEG	--	34.342	352.223	163073	2.03044e+07	2.11041e+06	412163	349298	284578	3.26123e+06	3.22247e+06	3.22252e+06	--	--	--	-	-	-	-
M303T38_2_NEG	--	37.574	303.232	6.76837e+06	191413	723091	572095	1.60599e+06	994691	1.93242e+06	1.93133e+06	1.91435e+06	--	--	--	-	-	-	-
M339T29_2_NEG	--	29.4115	339.163	38044.7	89076.2	149536	139211	7.93176e+06	50905.5	47920.9	54224.3	54017.2	--	--	--	-	-	-	-
M289T33_NEG	--	33.454	289.039	242232	12846.2	121083	6.0824e+06	1.97694e+06	4.31665e+06	2.82281e+06	2.89684e+06	2.89726e+06	--	--	--	-	-	-	-
M602T31_4_NEG	--	30.573	602.448	676684	502712	1.39256e+07	1.44051e+06	1.09033e+06	688983	2.08857e+06	1.97037e+06	2.08887e+06	--	--	--	-	-	-	-
M551T29_2_NEG	--	28.819	551.304	571003	3.44705e+06	2.51814e+06	3.27103e+06	3.26635e+06	2.97969e+06	3.33977e+06	3.3343e+06	3.33974e+06	--	--	--	-	-	-	-
M279T160_NEG	--	160.262	279.039	3.38386e+07	362705	1.87174e+06	6.11071e+06	9.96411e+06	1.18598e+07	1.56869e+07	1.55883e+07	1.55611e+07	--	--	--	-	-	-	-
M293T73_NEG	--	72.691	293.033	182308	56779.5	259485	1.90724e+07	5.45762e+06	1.01494e+07	7.16948e+06	7.09539e+06	7.16941e+06	--	--	--	-	-	-	-
M603T25_2_NEG	--	25.293	603.465	355352	2.83009e+06	1.30006e+07	2.5654e+06	1.08717e+06	584134	713793	669449	713359	--	--	--	-	-	-	-
M342T22_3_NEG	--	22.044	342.15	228353	4.88845e+06	2.6444e+06	782141	676881	611495	1.26977e+06	1.28934e+06	1.2893e+06	--	--	--	-	-	-	-
M325T35_2_NEG	--	35.439	325.237	4056.86	25108.2	14345.2	29360.7	4.01809e+06	11391.7	27995.8	25041.5	25132.3	--	--	--	-	-	-	-
M521T29_2_NEG	--	28.961	521.294	68020.4	1.84437e+06	4.58063e+06	190772	158155	131070	832768	899166	833108	--	--	--	-	-	-	-
M423T23_NEG	--	22.909	423.002	125122	31728.6	559667	3.26749e+06	1.92382e+06	3.44125e+06	2.15543e+06	2.18229e+06	2.18229e+06	--	--	--	-	-	-	-
M260T23_NEG	--	23.487	259.954	5960.98	70419.6	102363	708946	4.61054e+06	1.50576e+06	307183	306210	307183	--	--	--	-	-	-	-
M427T156_2_NEG	--	156.49	427.26	889664	1.63265e+06	2.3159e+06	1.14718e+07	8.66573e+06	1.09489e+07	7.48743e+06	7.37109e+06	7.37074e+06	--	--	--	-	-	-	-
M423T35_NEG	--	35.4415	423.346	500528	2.46067e+06	3.30275e+06	203094	181360	128971	1.76614e+06	1.33805e+06	1.35369e+06	--	--	--	-	-	-	-
M381T47_NEG	--	47.0105	381.335	554780	5.1787e+06	1.737e+06	144832	99633.5	90327.1	340672	338785	338788	--	--	--	-	-	-	-
M425T35_2_NEG	--	34.859	425.362	422975	6.01391e+06	2.00736e+06	509651	522934	262867	667423	665920	661412	--	--	--	-	-	-	-
M537T26_NEG	--	26.414	537.322	133261	2.42106e+06	4.11436e+06	598057	513688	547041	1.81608e+06	1.80165e+06	1.82072e+06	--	--	--	-	-	-	-
M97T421_2_NEG	--	421.105	96.9608	1.88623e+06	413527	355364	3.02962e+06	2.8394e+06	2.98708e+06	2.31594e+06	2.39103e+06	2.31636e+06	--	--	--	-	-	-	-
M277T25_NEG	--	25.033	277.001	10577.4	5162.95	23186.9	2.58513e+06	408178	715225	818229	830053	818188	--	--	--	-	-	-	-
M213T49_NEG	--	48.881	213.185	129412	2.88674e+06	1.94065e+06	230645	123785	367699	874086	874120	866608	--	--	--	-	-	-	-
M560T30_NEG	--	30.3155	560.433	442029	7.08632e+06	4.40585e+06	239303	156310	131311	2.11069e+06	2.11073e+06	2.12585e+06	--	--	--	-	-	-	-
M281T56_NEG	--	56.0215	281.211	1.9469e+06	11858.3	14645.8	4486.36	4572.76	4650.78	4556.79	5174.53	4504.88	--	--	--	-	-	-	-
M561T25_2_NEG	--	25.48	561.418	354440	2.15243e+06	2.25283e+06	3.23258e+06	2.58261e+06	1.75771e+06	1.01881e+06	990371	1.01855e+06	--	--	--	-	-	-	-
M462T179_NEG	--	178.694	462.298	867000	296952	1.31341e+06	3.52251e+06	5.07939e+06	4.57514e+06	2.35919e+06	2.38479e+06	2.35914e+06	--	--	--	-	-	-	-
M62T14_NEG	--	13.509	61.989	1.72395e+07	2.58845e+07	2.38259e+07	1.5699e+07	2.50682e+07	1.22523e+07	1.79354e+07	1.80507e+07	1.79797e+07	--	--	--	-	-	-	-
M409T27_2_NEG	--	26.8	409.021	60907.2	2378.88	11357	290468	1.80963e+06	183021	713365	705899	713418	--	--	--	-	-	-	-
M293T25_2_NEG	--	24.693	293.047	5516.06	1.74715e+06	2.9465e+06	47597.4	37516.9	42343.7	25723.3	25417.9	25413.1	--	--	--	-	-	-	-
M293T27_NEG	--	26.512	293.132	97157.4	1.89256e+06	3.42569e+06	239680	207343	214651	1.19956e+06	1.23018e+06	1.23022e+06	--	--	--	-	-	-	-
M493T27_2_NEG	--	27.041	493.261	10911.7	149892	57296.2	38930.3	2.50146e+06	28967.1	69997	69992.9	73113.5	--	--	--	-	-	-	-
M632T36_NEG	--	35.9515	631.526	34453.3	2.3174e+06	3.30439e+06	47180.7	25067.7	27665.8	26361.3	25399.2	25390.1	--	--	--	-	-	-	-
M521T26_2_NEG	--	25.654	521.327	325247	1.24491e+06	1.341e+06	2.13784e+06	2.06554e+06	2.25617e+06	1.6638e+06	1.63275e+06	1.66418e+06	--	--	--	-	-	-	-
M350T123_NEG	--	123.267	350.235	9958.3	6.27782e+06	311934	33017.9	30644.9	30165.4	389829	386321	389859	--	--	--	-	-	-	-
M284T43_NEG	--	42.633	284.267	4.08071e+06	1.55298e+06	1.39492e+06	2.30688e+06	1.47966e+06	1.95005e+06	1.90416e+06	1.83861e+06	1.77931e+06	--	--	--	-	-	-	-
M499T45_NEG	--	44.879	499.126	70330.9	162186	339653	2.31604e+06	1.13196e+06	2.36766e+06	827877	818044	817884	--	--	--	-	-	-	-
M365T30_2_NEG	--	30.179	365.161	8249.28	3.90749e+06	1.73573e+06	29704.3	32009.9	25948.4	25694.6	27864.2	27875.7	--	--	--	-	-	-	-
M770T39_NEG	--	38.9455	769.555	44889.8	6023.1	20560.9	22836.4	33119.8	33973.6	28575.6	28941.6	28576.7	--	--	--	-	-	-	-
M424T47_2_NEG	--	46.9145	424.35	94427	2.50441e+06	2.12825e+06	71243.9	51828	59635.7	335859	333705	335064	--	--	--	-	-	-	-
M749T37_NEG	--	37.303	748.524	1.93982e+06	27051.8	82442.5	207792	318827	352132	234679	235895	234687	--	--	--	-	-	-	-
M655T32_NEG	--	32.173	655.387	63054.9	127806	461144	1.83582e+06	835116	741696	315139	297254	315153	--	--	--	-	-	-	-
M397T47_NEG	--	47.048	397.33	151748	2.43391e+06	4.50431e+06	828243	336487	322330	456436	456500	451425	--	--	--	-	-	-	-
M227T36_2_NEG	--	35.983	227.201	393354	2.22703e+06	1.92909e+06	502318	408342	650195	1.12783e+06	1.08567e+06	1.08562e+06	--	--	--	-	-	-	-
M491T25_NEG	--	24.82	491.318	247903	929915	1.42533e+06	2.01165e+06	1.21786e+06	1.01931e+06	621607	621477	629743	--	--	--	-	-	-	-
M375T32_2_NEG	--	31.522	375.325	284760	47199	61588.8	920267	625287	530591	658374	654889	768127	--	--	--	-	-	-	-
M525T33_2_NEG	--	32.739	525.394	977899	116123	88599.1	919621	798360	462571	606832	631550	604951	--	--	--	-	-	-	-
M375T37_NEG	--	36.955	375.289	468573	489869	729967	1.63453e+06	1.19117e+06	1.31807e+06	1.16092e+06	1.17405e+06	1.16092e+06	--	--	--	-	-	-	-
M256T47_NEG	--	46.809	256.236	2.28216e+06	2.61435e+06	2.79515e+06	1.58058e+06	1.58106e+06	2.86014e+06	3.28955e+06	3.29177e+06	2.66174e+06	--	--	--	-	-	-	-
M256T61_NEG	--	60.508	256.199	1.74675e+06	24238.9	43666.4	18059.2	1.12444e+06	16346.5	20079.3	20042.3	16068.6	--	--	--	-	-	-	-
M196T30_NEG	--	29.673	196.01	144598	135050	251294	404726	2.01472e+06	472459	689591	689585	683650	--	--	--	-	-	-	-
M352T47_NEG	--	46.66	352.248	8616.51	1.86383e+06	195082	6641.01	8527.04	18657.6	170081	170108	173354	--	--	--	-	-	-	-
M166T173_NEG	--	172.899	166.018	1.92308e+06	146011	704961	155513	355084	460445	732690	742874	743005	--	--	--	-	-	-	-
M263T25_NEG	--	24.693	263.022	119363	17763.9	92824.7	822425	996247	1.17127e+06	720414	706183	706271	--	--	--	-	-	-	-
M604T26_2_NEG	--	25.952	604.468	345304	3.38388e+06	6.26326e+06	1.21547e+06	648785	225100	923995	820336	921958	--	--	--	-	-	-	-
M725T136_NEG	--	136.374	724.527	1.23049e+06	73359.9	248321	2.10651e+06	2.23088e+06	2.85309e+06	468589	468617	441347	--	--	--	-	-	-	-
M561T33_2_NEG	--	32.933	561.369	21900.3	2.91459e+06	3.16952e+06	42968.4	17591.6	862697	26065.3	26114	25054.7	--	--	--	-	-	-	-
M99T22_NEG	--	22.041	98.9486	13592.1	6354.11	5208.56	21877.3	23500.1	19364.4	116716	117676	116713	--	--	--	-	-	-	-
M233T442_NEG	--	441.643	233.067	957941	57147.2	87627.4	696055	1.02568e+06	993768	1.48282e+06	1.45086e+06	1.48283e+06	--	--	--	-	-	-	-
M527T97_NEG	--	96.7025	527.049	49026.4	6348.52	71152.1	2.33981e+06	1.34254e+06	8.28612e+06	2.52527e+06	2.48581e+06	2.52506e+06	--	--	--	-	-	-	-
M471T24_3_NEG	--	24.073	471.277	205979	219802	630524	1.21866e+06	1.17132e+06	1.09729e+06	927384	932023	927381	--	--	--	-	-	-	-
M409T25_NEG	--	25.0175	408.985	72631.1	2540.81	56705.7	778673	159452	1.40402e+06	670034	622469	670097	--	--	--	-	-	-	-
M439T30_2_NEG	--	30.152	439.104	122669	23453.3	51289.8	1.10946e+06	531896	1.34692e+06	596443	595882	601425	--	--	--	-	-	-	-
M343T22_1_NEG	--	22.044	342.652	90397.6	1.47351e+06	834108	273157	241471	225339	441816	436772	441831	--	--	--	-	-	-	-
M439T26_2_NEG	--	26.1295	439.068	862.102	11154.9	29595.4	32614	52657.3	954138	24555.5	24686.7	22968.4	--	--	--	-	-	-	-
M293T34_NEG	--	34.053	293.103	4139.05	1.19993e+06	4725.6	9446.7	17642.9	8935.66	7840.67	8292.8	8290.19	--	--	--	-	-	-	-
M185T51_2_NEG	--	51.032	185.154	74853.3	1.91261e+06	654649	190331	56187.7	303430	351564	357906	357708	--	--	--	-	-	-	-
M465T34_2_NEG	--	33.794	465.393	290143	1.61003e+06	1.19476e+06	91940.1	79189.6	56989.6	1.08948e+06	1.12627e+06	1.08928e+06	--	--	--	-	-	-	-
M397T35_NEG	--	34.755	397.33	215438	478224	1.26133e+06	342603	257378	193124	436400	431819	436395	--	--	--	-	-	-	-
M397T28_NEG	--	28.1345	397.258	232151	7167.46	1.24316e+06	46429.3	42334.4	45497.6	34545.1	33991.7	33992.5	--	--	--	-	-	-	-
M644T30_NEG	--	29.722	644.491	136320	3.45133e+06	3.14261e+06	329208	165894	111481	224368	224377	230437	--	--	--	-	-	-	-
M79T53_2_NEG	--	52.987	78.919	3.24305e+06	815304	1.88864e+06	2.9068e+06	3.58244e+06	3.3519e+06	2.91409e+06	2.87959e+06	2.87963e+06	--	--	--	-	-	-	-
M297T36_1_NEG	--	36.104	297.242	187652	1.06617e+06	422753	156466	113549	163486	370182	364381	364459	--	--	--	-	-	-	-
M361T32_3_NEG	--	32.103	361.31	330204	191760	138751	998322	664237	610297	541597	552691	535373	--	--	--	-	-	-	-
M392T28_NEG	--	28.414	392.078	28785.4	5024.11	25562.9	466541	312538	520074	367654	356334	356329	--	--	--	-	-	-	-
M303T32_NEG	--	32.4445	303.158	877.663	158309	321238	4062.85	4078.43	697449	4259.31	4242.22	4595.67	--	--	--	-	-	-	-
M411T47_NEG	--	46.861	411.345	113713	1.35277e+06	1.63365e+06	380868	248340	236120	271099	270080	270350	--	--	--	-	-	-	-
M619T29_3_NEG	--	28.632	619.463	126506	2.91287e+06	3.37908e+06	200806	113666	90480.2	591094	561546	561235	--	--	--	-	-	-	-
M494T29_2_NEG	--	29.213	494.298	13939.8	45151.6	28930.2	30714.2	62479	40692.3	55761.8	54885.8	56800.1	--	--	--	-	-	-	-
M378T32_NEG	--	32.282	378.064	19040.4	42244.7	18855	1.30002e+06	1.72149e+06	1.60881e+06	452701	452703	450352	--	--	--	-	-	-	-
M81T53_2_NEG	--	52.983	80.9171	3.14387e+06	833349	1.93213e+06	2.84226e+06	3.574e+06	3.24674e+06	2.96349e+06	2.96399e+06	2.99455e+06	--	--	--	-	-	-	-
M301T37_NEG	--	37.338	301.216	1.09441e+06	21462.5	79843.8	120693	468268	423565	401633	401729	333889	--	--	--	-	-	-	-
M538T27_2_NEG	--	27.041	538.325	47403.1	793676	1.31259e+06	206539	196661	182009	585158	581085	581138	--	--	--	-	-	-	-
M389T31_4_NEG	--	31.454	389.34	210181	31367.5	57217.3	686792	432634	380749	284847	289029	284859	--	--	--	-	-	-	-
M632T31_3_NEG	--	30.573	632.481	118350	2.1846e+06	2.66863e+06	583722	298911	148929	231690	230458	233926	--	--	--	-	-	-	-
M173T25_NEG	--	24.693	172.991	598494	17577	6004.38	1.2855e+06	957144	1.17016e+06	720665	720592	703096	--	--	--	-	-	-	-
M497T32_NEG	--	31.522	497.11	31027.5	4667.91	28641.6	617120	436064	1.02424e+06	389836	380317	389747	--	--	--	-	-	-	-
M421T35_NEG	--	34.8215	421.33	116262	1.281e+06	2.22839e+06	146172	97280.1	68367.2	206704	206746	209395	--	--	--	-	-	-	-
M700T38_NEG	--	37.8465	699.511	185028	26083.4	52059.7	111398	80394.2	132344	68989.6	70740.6	68989	--	--	--	-	-	-	-
M349T27_3_NEG	--	27.084	349.203	102169	846785	418524	115684	114432	107290	268019	264462	264494	--	--	--	-	-	-	-
M285T295_NEG	--	295.426	285.112	89882.7	425536	411203	549378	461552	560494	434874	437662	437641	--	--	--	-	-	-	-
M539T31_3_NEG	--	31.235	539.302	22726	89949.8	984548	179975	152942	187417	281918	263000	402828	--	--	--	-	-	-	-
M505T35_2_NEG	--	35.4405	505.255	7339.08	16662.2	368431	9134.99	10374.7	8254.96	25869.4	44411.4	29977.5	--	--	--	-	-	-	-
M191T469_NEG	--	468.984	191.02	5.93962e+06	338853	631550	987615	770753	1.36508e+06	1.4168e+06	1.41032e+06	1.47622e+06	--	--	--	-	-	-	-
M455T23_NEG	--	23.146	455.281	373805	513773	799064	416503	477220	373282	406299	406296	407812	--	--	--	-	-	-	-
M312T35_NEG	--	35.192	312.254	110388	13222.8	1.67361e+06	9167.3	5980.45	67717.1	5967.01	6955.52	7298.75	--	--	--	-	-	-	-
M135T192_NEG	--	191.632	135.031	4.3203e+06	177189	279778	335756	447560	409963	1.3306e+06	1.30575e+06	1.305e+06	--	--	--	-	-	-	-
M605T23_NEG	--	22.811	605.349	29015.7	769747	357585	161047	116753	127581	235858	237291	237292	--	--	--	-	-	-	-
M615T25_NEG	--	25.0495	615.464	60664.9	1.09159e+06	1.10116e+06	637085	469035	289178	327323	326746	335417	--	--	--	-	-	-	-
M221T28_NEG	--	28.162	221.086	40691.9	34375.3	5854.46	366463	384549	336434	219808	211609	211550	--	--	--	-	-	-	-
M747T36_NEG	--	36.145	746.508	859232	24577.3	46070.2	126924	173147	224995	153536	150017	153649	--	--	--	-	-	-	-
M210T59_NEG	--	59.177	210.007	3.27301e+06	53765.3	300319	44107.9	172288	187395	799864	795150	799930	--	--	--	-	-	-	-
M337T34_1_NEG	--	34.43	337.204	179685	1.36656e+06	616848	1.03567e+06	1.05258e+06	776205	1.00707e+06	1.0069e+06	997410	--	--	--	-	-	-	-
M747T133_1_NEG	--	132.923	746.511	1.27874e+06	20042	75287.9	199912	286084	433183	306806	301862	304411	--	--	--	-	-	-	-
M582T181_2_NEG	--	180.763	582.376	624682	178347	312634	604929	1.22472e+06	1.05225e+06	801172	830062	800734	--	--	--	-	-	-	-
M453T142_NEG	--	142.415	453.26	34218.4	577674	1.47201e+06	301218	194826	171937	288426	292976	290820	--	--	--	-	-	-	-
M191T521_NEG	--	520.959	191.02	1.04325e+06	889897	482260	726533	568500	697850	525089	670304	570386	--	--	--	-	-	-	-
M499T30_NEG	--	29.863	499.307	174147	164564	388183	1.06668e+06	907023	772286	632352	604677	605414	--	--	--	-	-	-	-
M271T35_2_NEG	--	35.435	271.227	249723	598503	737634	234179	173242	151061	389651	374292	374297	--	--	--	-	-	-	-
M399T29_1_NEG	--	28.85	399.001	419167	33873.5	102454	1.04575e+06	567878	383831	302475	299742	302472	--	--	--	-	-	-	-
M199T50_2_NEG	--	50.051	199.17	268187	1.04177e+06	1.10117e+06	676605	820453	687444	719035	702911	702860	--	--	--	-	-	-	-
M294T27_NEG	--	26.604	293.633	32205.9	587724	1.00988e+06	74938.9	73599.2	75345.7	383966	383952	385583	--	--	--	-	-	-	-
M381T34_2_NEG	--	34.173	381.335	479817	813697	706189	119503	99037.1	81620.9	364581	364574	366822	--	--	--	-	-	-	-
M87T128_NEG	--	127.698	87.0087	1.46758e+06	168726	4.20357e+06	2.72667e+06	2.72188e+06	3.07809e+06	2.87755e+06	2.87776e+06	2.82599e+06	--	--	--	-	-	-	-
M87T97_NEG	--	96.9375	87.0085	133864	686091	1.08932e+06	507433	37968.6	786035	30095.7	32288.6	32225.2	--	--	--	-	-	-	-
M411T35_3_NEG	--	34.602	411.346	180344	437276	813711	319519	287599	192044	312434	305664	312450	--	--	--	-	-	-	-
M411T30_2_NEG	--	29.884	411.308	7491.56	368259	703767	30957.6	35152.6	41754.7	18867.8	15888.1	15590.4	--	--	--	-	-	-	-
M333T428_NEG	--	428.485	333.058	592875	9564.44	20425.8	48451.3	96789.2	98895.6	303497	300961	302210	--	--	--	-	-	-	-
M349T91_NEG	--	91.4785	349.058	193240	217010	702000	3.87207e+06	2.82773e+06	1.7619e+06	1.71749e+06	2.01386e+06	2.01414e+06	--	--	--	-	-	-	-
M241T69_NEG	--	68.857	241.216	110375	3.03963e+06	1.25634e+06	65739.2	56593.3	58191.2	689494	694479	709781	--	--	--	-	-	-	-
M489T97_NEG	--	96.53	489.264	13819.1	1.00128e+06	2.41269e+06	213284	151953	128273	296883	296890	307860	--	--	--	-	-	-	-
M279T61_NEG	--	60.761	279.195	13892	4163.35	9442.34	733956	1.02215e+06	2946.01	6290.48	5940.16	6296.53	--	--	--	-	-	-	-
M277T205_NEG	--	204.689	277.001	3979.15	13556.2	27011.4	126578	170883	596822	265781	265791	259471	--	--	--	-	-	-	-
M511T34_2_NEG	--	33.7165	511.376	167809	96473.4	56357.8	261026	305054	170848	239239	244691	239136	--	--	--	-	-	-	-
M543T31_NEG	--	31.263	543.368	31563.3	77771.8	51531.4	217094	621254	310446	323914	323875	320186	--	--	--	-	-	-	-
M247T229_NEG	--	228.676	246.991	17528.5	10015.6	31041.6	466907	265882	297371	285384	282813	282786	--	--	--	-	-	-	-
M497T151_NEG	--	150.8	497.286	167073	1.27492e+06	855864	653355	550488	381196	595426	595444	568486	--	--	--	-	-	-	-
M424T33_5_NEG	--	33.4745	424.422	2701.63	29023.9	93716	1196.33	3505.37	2081.74	1500.24	1555.32	2138.29	--	--	--	-	-	-	-
M533T96_NEG	--	96.228	533.254	26126.5	1.11847e+06	3.02282e+06	265061	190620	163481	386325	361167	361032	--	--	--	-	-	-	-
M612T30_2_NEG	--	29.51	612.464	21006.2	702401	503766	68027	45190.6	40714.7	152652	147725	147710	--	--	--	-	-	-	-
M191T541_NEG	--	540.596	191.02	2.51593e+06	540154	226655	775255	463703	1.16769e+06	367979	323343	335197	--	--	--	-	-	-	-
M586T29_2_NEG	--	29.119	586.449	69882.4	1.43537e+06	960302	205719	145327	119317	351745	349661	349669	--	--	--	-	-	-	-
M187T223_NEG	--	222.987	187.042	882620	1515.3	6491.1	77650.2	158412	151632	303566	307603	303536	--	--	--	-	-	-	-
M295T41_2_NEG	--	40.909	295.263	96911.4	1.8449e+06	468337	120942	79365.6	141614	384950	392459	384918	--	--	--	-	-	-	-
M823T35_1_NEG	--	34.79	822.535	502863	8490.93	31601.1	43925.3	61819.7	63266.5	73508.5	73501.8	69996.8	--	--	--	-	-	-	-
M554T185_2_NEG	--	184.533	554.345	565750	114025	423618	387184	722551	679659	726552	726583	717723	--	--	--	-	-	-	-
M496T25_NEG	--	24.82	496.352	41841.3	212515	420144	747725	448903	300609	173809	173809	175606	--	--	--	-	-	-	-
M111T33_3_NEG	--	33.19	110.976	304284	121137	238051	530545	1.22772e+06	926551	922669	934906	922651	--	--	--	-	-	-	-
M660T30_3_NEG	--	30.16	660.485	24891.6	648461	949503	100306	76728.2	57298.8	68200.8	66699.8	67506.3	--	--	--	-	-	-	-
M395T34_2_NEG	--	34.386	395.171	6146.96	467346	197718	18898	17681.7	9398.5	14910.4	13658.1	13230	--	--	--	-	-	-	-
M367T303_NEG	--	302.56	367.104	1.22752e+06	155280	404652	1.35265e+06	2.62396e+06	1.53964e+06	1.64736e+06	1.61855e+06	1.61827e+06	--	--	--	-	-	-	-
M375T62_NEG	--	61.907	375.29	241633	1.73875e+06	1.85743e+06	2.46602e+06	2.02002e+06	2.17749e+06	1.97054e+06	1.97053e+06	1.91334e+06	--	--	--	-	-	-	-
M213T36_NEG	--	35.956	213.185	39512.1	693851	510037	97660.4	42133	100418	263614	257257	257262	--	--	--	-	-	-	-
M451T34_NEG	--	34.19	451.377	191116	670271	754953	112139	91229.8	76871.5	534750	559169	534837	--	--	--	-	-	-	-
M451T33_3_NEG	--	32.984	451.447	12102.2	679728	727368	6788.2	76652.6	9733.91	3533.52	3104.46	3528.1	--	--	--	-	-	-	-
M828T34_1_NEG	--	33.683	827.58	298292	9999.03	36760.7	85160.5	68933.2	80474.7	69457.9	66579.2	66593.9	--	--	--	-	-	-	-
M328T172_2_NEG	--	172.284	328.069	4163.44	6721.85	52285	19894	148637	68815.9	108298	107010	108307	--	--	--	-	-	-	-
M586T33_5_NEG	--	32.783	586.412	2652.11	688036	15535.7	23413.8	20251.9	14879.2	24086.3	23533.4	23535.1	--	--	--	-	-	-	-
M89T270_NEG	--	269.977	89.0243	1.40063e+06	305796	848782	1.51118e+06	3.41992e+06	3.34481e+06	1.60865e+06	1.91836e+06	1.61311e+06	--	--	--	-	-	-	-
M220T17_NEG	--	17.3915	220.146	317362	942813	752135	1.01834e+06	1.12598e+06	1.87143e+06	616741	667980	617491	--	--	--	-	-	-	-
M799T35_NEG	--	35.18	798.536	412731	29341.4	22895.8	51396.3	90734.5	82663.4	70888	71103.5	70887.8	--	--	--	-	-	-	-
M220T694_NEG	--	693.508	220.146	275045	233057	538433	311734	278689	458955	390333	378805	495658	--	--	--	-	-	-	-
M157T56_2_NEG	--	56.102	157.123	574022	935685	1.08022e+06	1.39798e+06	369487	1.56185e+06	798598	792826	787224	--	--	--	-	-	-	-
M509T36_1_NEG	--	36.112	509.287	190259	125217	270838	249675	266607	284662	348140	335480	348311	--	--	--	-	-	-	-
M441T63_NEG	--	62.882	441.335	37138.7	2.06374e+06	742733	101657	88447.5	91084.6	322434	350605	321205	--	--	--	-	-	-	-
M117T53_NEG	--	52.804	116.928	400918	438988	703032	784168	587932	664780	7.87356e+06	5.69159e+06	7.62812e+06	--	--	--	-	-	-	-
M659T29_1_NEG	--	29.174	658.502	27163.8	837683	513651	79321.3	44227.8	26694.4	74049.1	77343.1	74389.3	--	--	--	-	-	-	-
M343T22_2_NEG	--	22.06	343.151	43215.9	608376	315828	112201	93643.2	82300.5	157573	158738	157574	--	--	--	-	-	-	-
M253T59_NEG	--	59.002	253.18	583790	27325.3	19638.5	30064.6	570878	37808.7	12190.6	10929.8	12223	--	--	--	-	-	-	-
M363T27_NEG	--	26.999	363.219	30344.4	437549	329162	199155	135824	168699	223927	223848	228370	--	--	--	-	-	-	-
M408T33_1_NEG	--	32.9585	408.074	6986.24	7870.45	11928.8	445197	163319	249174	201479	205711	200942	--	--	--	-	-	-	-
M483T77_NEG	--	76.937	483.309	15178.4	805640	2.14147e+06	205377	140929	108651	278052	274384	274361	--	--	--	-	-	-	-
M453T34_2_NEG	--	33.99	453.392	175061	326726	422664	286966	263396	154825	278927	282701	278949	--	--	--	-	-	-	-
M191T572_NEG	--	572.416	191.019	3.56781e+06	2.16325e+06	3.35211e+06	8.49137e+06	2.98928e+06	4.3547e+06	1.40199e+06	1.32124e+06	1.31978e+06	--	--	--	-	-	-	-
M220T715_NEG	--	714.715	220.146	531748	553058	288662	266982	596990	349837	461862	514093	512868	--	--	--	-	-	-	-
M220T67_NEG	--	67.49	220.146	1.85398e+06	623060	702695	1.52864e+06	936201	1.51761e+06	885670	998482	993839	--	--	--	-	-	-	-
M436T181_2_NEG	--	180.763	436.282	359892	74945	320777	636383	867331	760136	488723	488839	506443	--	--	--	-	-	-	-
M255T68_NEG	--	68.083	255.232	738513	2.13232e+06	1.13118e+06	441312	428099	411735	884622	884231	952840	--	--	--	-	-	-	-
M327T90_NEG	--	90.059	327.085	339775	1.8317e+06	2.27127e+06	2.13041e+06	1.74327e+06	2.27016e+06	1.68392e+06	1.60539e+06	1.59663e+06	--	--	--	-	-	-	-
M228T33_1_NEG	--	32.8725	227.997	708116	12362	17473.6	529522	589888	574484	457584	480096	468740	--	--	--	-	-	-	-
M437T33_2_NEG	--	33.008	437.433	11738.3	485606	483244	9823.31	66845.8	10192.4	4580.57	4683.64	4752.08	--	--	--	-	-	-	-
M437T35_2_NEG	--	34.602	437.361	107124	528601	533767	84556.2	102469	70814.1	275815	275749	288329	--	--	--	-	-	-	-
M483T37_NEG	--	36.807	483.271	50518.2	110153	263497	334017	505276	388724	310275	312326	234090	--	--	--	-	-	-	-
M461T35_NEG	--	35.39	461.267	42840.7	118841	33637.6	37941.2	114694	62175.4	116600	116587	117865	--	--	--	-	-	-	-
M461T30_2_NEG	--	30.3665	461.326	17910.7	29193.2	91497	83379.2	79532	82908.5	73698.4	70987	73651.7	--	--	--	-	-	-	-
M462T149_NEG	--	148.746	462.297	276861	216261	248969	1.35842e+06	3.24198e+06	3.07787e+06	1.89191e+06	1.80888e+06	1.89047e+06	--	--	--	-	-	-	-
M804T35_2_NEG	--	34.8905	803.578	363299	4792.7	54027.1	72689.1	81808.7	57980.1	40124.1	35930.8	35923.7	--	--	--	-	-	-	-
M291T24_NEG	--	24.0155	291.016	14969	13986.3	19566.6	358442	142301	791612	237601	224206	223961	--	--	--	-	-	-	-
M393T32_2_NEG	--	31.6545	393.299	9801.26	25408.4	212330	216735	553682	373955	195915	190245	190219	--	--	--	-	-	-	-
M267T43_2_NEG	--	43.301	267.232	178432	1.06549e+06	458009	361895	230264	237125	438891	393529	392671	--	--	--	-	-	-	-
M547T26_2_NEG	--	25.6305	547.402	109910	372273	342367	670196	592825	448393	276338	267613	272185	--	--	--	-	-	-	-
M407T218_2_NEG	--	217.788	407.279	165176	735074	1.26031e+06	595297	829308	533015	737897	732400	738023	--	--	--	-	-	-	-
M428T165_NEG	--	164.608	428.335	682.909	15306.7	19161.5	2546.73	886589	1.05703e+06	4600.12	4599.2	4493.13	--	--	--	-	-	-	-
M280T33_NEG	--	33.169	280.264	293793	9281.65	42297.9	59510.9	65771.7	46640.1	104665	107154	104662	--	--	--	-	-	-	-
M199T275_NEG	--	274.91	199.037	243910	6636.26	66555.9	80914.2	445916	394695	336319	336340	333005	--	--	--	-	-	-	-
M117T108_NEG	--	107.888	116.929	2.14671e+06	1.06087e+06	915012	1.16373e+06	3.08426e+06	3.34446e+06	6.83398e+06	6.83594e+06	7.00397e+06	--	--	--	-	-	-	-
M379T31_NEG	--	31.3085	379.283	14305.7	1.20773e+06	56045.5	153239	343008	263329	129374	124017	124020	--	--	--	-	-	-	-
M327T49_2_NEG	--	49.022	327.289	151607	853554	1.68509e+06	231846	184466	193644	376754	438525	438712	--	--	--	-	-	-	-
M495T28_2_NEG	--	27.642	495.31	49058.4	637755	63545.7	122958	57510.2	85262.4	124636	124793	137705	--	--	--	-	-	-	-
M285T71_NEG	--	70.958	285.242	74990.4	2.00935e+06	388756	33207.9	33839.5	33383	158877	160318	166376	--	--	--	-	-	-	-
M329T295_NEG	--	295.426	329.102	61701.4	329764	293863	359732	305069	374087	300762	305144	305146	--	--	--	-	-	-	-
M117T14_NEG	--	13.661	116.928	424210	349445	112010	109408	401559	558772	3.07568e+06	2.98825e+06	1.41842e+06	--	--	--	-	-	-	-
M689T32_NEG	--	32.439	689.179	1146.43	5970.93	13709.7	427019	336212	393510	143450	141155	143474	--	--	--	-	-	-	-
M455T107_NEG	--	106.565	455.313	4818.4	1.45282e+06	1.31269e+06	67430.3	56699.3	31611.9	206164	206132	221340	--	--	--	-	-	-	-
M366T31_3_NEG	--	31.263	366.163	1909.56	887819	336022	223226	5813.98	2977.6	3405.92	4572.49	4973.83	--	--	--	-	-	-	-
M701T29_NEG	--	28.632	700.519	69610	372839	33342.9	188923	215398	88365.7	98830.9	64792.4	98865.4	--	--	--	-	-	-	-
M546T31_3_NEG	--	30.503	546.418	58991.9	1.00265e+06	550316	41770.9	26616.8	28533.4	372978	370444	370457	--	--	--	-	-	-	-
M77T644_NEG	--	643.611	76.9701	557063	852935	116749	1.86411e+06	1.46253e+06	2.21361e+06	870106	1.04829e+06	1.04851e+06	--	--	--	-	-	-	-
M398T47_NEG	--	46.6845	398.334	49535.2	593676	1.12176e+06	227772	85922.4	90938.4	122933	121130	121129	--	--	--	-	-	-	-
M401T35_NEG	--	35.315	401.244	95937.5	20528.5	57062	226790	378297	263255	199520	192513	200258	--	--	--	-	-	-	-
M247T29_NEG	--	28.533	247.027	69331.5	5489.31	26805.8	449536	366001	372266	279608	279623	282711	--	--	--	-	-	-	-
M89T250_NEG	--	250.242	89.0245	3.49382e+06	110368	284698	944840	1.23155e+06	1.35034e+06	1.47028e+06	1.47501e+06	1.35923e+06	--	--	--	-	-	-	-
M195T421_NEG	--	421.095	194.927	280732	31581.7	18264.2	512220	437270	456837	377596	376832	374377	--	--	--	-	-	-	-
M600T30_NEG	--	29.535	600.465	30330	900952	670951	180734	100215	96707.8	168353	168039	169248	--	--	--	-	-	-	-
M824T35_1_NEG	--	34.544	823.545	345118	6989.41	32269.5	28773.3	41176.8	46533.4	54579.8	53592.9	54601.6	--	--	--	-	-	-	-
M401T49_1_NEG	--	48.7145	401.161	25558.3	28180.1	88311.9	165852	987647	157280	272468	144406	273267	--	--	--	-	-	-	-
M672T29_NEG	--	29.022	672.487	27633.3	249982	155819	232488	139027	137452	66198.6	57919.5	66436.1	--	--	--	-	-	-	-
M271T74_NEG	--	73.8335	271.227	246530	2.86206e+06	1.3281e+06	194377	136484	155962	481520	488706	488714	--	--	--	-	-	-	-
M439T34_NEG	--	34.2605	439.377	176787	1.0838e+06	489528	334810	304899	183485	324148	330030	324011	--	--	--	-	-	-	-
M77T622_NEG	--	621.96	76.9699	1.03187e+06	1.48079e+06	1.1129e+06	1.17054e+06	2.23098e+06	1.07522e+06	1.58767e+06	2.12785e+06	1.8106e+06	--	--	--	-	-	-	-
M376T28_2_NEG	--	28.15	376.258	15081.4	36959.7	14955.2	392813	31472.6	33940.4	26080.7	24899.9	26084	--	--	--	-	-	-	-
M469T46_NEG	--	45.851	469.115	22325.5	31156	104058	703959	262610	480729	214926	214130	213070	--	--	--	-	-	-	-
M469T32_NEG	--	31.8565	469.115	26665.4	3655.17	26292.2	296722	166605	292953	263683	244399	244000	--	--	--	-	-	-	-
M720T37_NEG	--	37.382	720.493	359326	12625.8	65359.6	59429.9	86795.2	110409	85367.4	85371.4	78376	--	--	--	-	-	-	-
M389T81_NEG	--	80.59	389.268	132277	369587	674919	1.95133e+06	45646.8	802936	1.50957e+06	1.50907e+06	1.54612e+06	--	--	--	-	-	-	-
M519T25_NEG	--	25.324	519.312	67332.7	611806	672488	365159	307768	349173	430332	423297	423337	--	--	--	-	-	-	-
M417T31_3_NEG	--	31.235	417.371	94969.7	17432.9	13896.9	297135	173110	133347	71355.9	71353.8	70873.2	--	--	--	-	-	-	-
M335T22_2_NEG	--	22.163	335.142	45585.4	322621	401770	166965	154565	131534	193509	193536	198846	--	--	--	-	-	-	-
M335T33_NEG	--	32.933	335.078	55291.1	264207	467949	49551.1	104763	106033	63998.6	62288.6	62270.7	--	--	--	-	-	-	-
M469T154_NEG	--	154.368	469.254	15870.3	979796	718562	150535	144473	93706.6	162075	162067	165708	--	--	--	-	-	-	-
M220T677_NEG	--	676.648	220.146	644605	674501	588943	798366	473418	637943	442416	228230	443163	--	--	--	-	-	-	-
M479T25_NEG	--	24.969	479.317	364668	358882	282250	447654	265781	219530	159483	159897	160675	--	--	--	-	-	-	-
M800T34_1_NEG	--	34.453	799.545	252292	9743.85	38672.7	42503.9	59397.3	53419	44106.3	42529	41918.3	--	--	--	-	-	-	-
M720T136_2_NEG	--	135.626	720.496	666742	15439.7	40819.7	121143	149164	280289	168051	168089	164928	--	--	--	-	-	-	-
M407T174_NEG	--	174.371	407.279	114951	80751.8	398218	902037	676692	930065	590299	589179	589177	--	--	--	-	-	-	-
M748T76_NEG	--	75.76	747.517	1.29714e+06	243229	313322	453837	390545	364039	165228	164906	176405	--	--	--	-	-	-	-
M305T30_NEG	--	29.884	305.105	49818.6	54735.6	140861	427551	238343	431877	230797	230820	233591	--	--	--	-	-	-	-
M351T26_NEG	--	26.221	351.089	35036.5	21228.8	9578.05	328375	302728	315409	205882	205032	205035	--	--	--	-	-	-	-
M187T32_NEG	--	32.033	186.973	12413	10634.7	60202.6	27305	67536.3	58960.6	80471.7	80471.4	79304.9	--	--	--	-	-	-	-
M481T35_2_NEG	--	34.9675	481.255	23294.2	14215.6	28453.4	65858.7	50764.1	64681.3	51654.5	50304.1	52781	--	--	--	-	-	-	-
M355T35_3_NEG	--	34.573	355.32	203146	234474	405730	270697	222796	179852	223296	223304	230445	--	--	--	-	-	-	-
M355T35_2_NEG	--	34.79	355.283	10379.8	228920	381119	20604.5	23172.8	32305.6	38289	36640.8	38289.3	--	--	--	-	-	-	-
M439T47_1_NEG	--	46.792	439.105	51833.5	85602.6	145795	889565	443272	510146	265090	265161	262240	--	--	--	-	-	-	-
M328T38_NEG	--	37.638	328.118	5689.52	6866.41	20648.4	184699	112288	138296	174056	174101	168979	--	--	--	-	-	-	-
M751T34_NEG	--	34.21	751.49	1421.76	17871.3	14452	12132.7	12935.7	7210.82	48260.9	31643.7	48151.6	--	--	--	-	-	-	-
M220T47_NEG	--	47.435	220.146	581001	478432	404258	657014	559236	815053	404328	403874	438489	--	--	--	-	-	-	-
M245T340_NEG	--	339.74	245.042	336312	6961.4	16646.2	30776.1	66101.7	69713.2	149776	149776	148303	--	--	--	-	-	-	-
M328T22_2_NEG	--	22.217	328.134	34701.9	354065	386775	144330	133295	96190.9	177051	179872	179412	--	--	--	-	-	-	-
M641T32_2_NEG	--	32.34	641.371	14505.2	28227.3	136718	327374	161297	151044	83001.2	82075.1	82069.9	--	--	--	-	-	-	-
M77T663_NEG	--	662.559	76.97	395852	112359	350714	531429	344380	244899	467165	434308	434663	--	--	--	-	-	-	-
M367T25_NEG	--	25.033	367.283	132785	15912.8	42188.1	504037	306587	249411	175591	176892	175600	--	--	--	-	-	-	-
M80T292_NEG	--	291.573	79.9571	1.30858e+06	69327	210320	181705	302541	293706	638096	638104	648039	--	--	--	-	-	-	-
M601T25_NEG	--	25.0495	601.449	41163.5	313376	388386	475488	336214	219079	149485	142486	142519	--	--	--	-	-	-	-
M535T89_NEG	--	89.1815	535.268	7611.66	484500	1.68987e+06	96141.2	90871.3	72832.6	242021	223593	241922	--	--	--	-	-	-	-
M363T35_NEG	--	35.244	363.181	1206.33	199990	10327.2	7707.46	5940.73	42320.6	7812.94	9517.25	11253	--	--	--	-	-	-	-
M485T205_NEG	--	205.374	485.325	19538.4	410224	856153	144353	123668	135085	218808	217140	217110	--	--	--	-	-	-	-
M101T22_NEG	--	22.041	100.946	3794.8	1990.47	2412.99	7402.74	6777.82	7433.13	31555.9	32673.9	31552	--	--	--	-	-	-	-
M327T50_NEG	--	49.7415	327.253	58793.6	208390	37811.1	7004.52	4412.8	10782.2	17782.1	28730.2	18338.3	--	--	--	-	-	-	-
M629T25_2_NEG	--	24.952	629.479	19172	396634	545238	412469	250536	155117	215793	213368	222122	--	--	--	-	-	-	-
M447T29_NEG	--	29.133	447.309	36099.2	70507	151267	76619.2	40140.7	33044.7	25559.3	22125.6	22443.3	--	--	--	-	-	-	-
M477T25_1_NEG	--	24.891	477.302	99838.4	305045	222467	248410	165393	161891	141612	141618	145424	--	--	--	-	-	-	-
M305T47_NEG	--	47.361	305.211	364332	20458.9	16020.6	8435.98	6536.9	11814.6	10411.4	9568.54	9548.62	--	--	--	-	-	-	-
M363T31_1_NEG	--	31.3585	363.074	13458.6	18828.7	32144.1	515432	140436	173415	163392	160558	160533	--	--	--	-	-	-	-
M199T258_NEG	--	257.694	199.037	133716	7111.64	80139.8	56074.2	359284	319910	211097	168511	169744	--	--	--	-	-	-	-
M687T29_NEG	--	28.85	686.501	28851.7	294518	102100	146871	133529	88460.4	46314.7	47133.7	46343.9	--	--	--	-	-	-	-
M572T28_2_NEG	--	27.734	572.433	37288.2	663719	567270	104197	64200.1	65535	234280	229875	234283	--	--	--	-	-	-	-
M553T30_2_NEG	--	29.863	553.245	5294.35	9699.6	30776.8	32419.3	25814.6	18568.2	26147.1	26501	26502.5	--	--	--	-	-	-	-
M323T49_NEG	--	48.7645	323.115	67790.3	55129.7	188889	915798	406102	649172	343274	313357	312966	--	--	--	-	-	-	-
M449T162_NEG	--	161.795	449.192	11330.3	57727.1	58567.4	287930	141842	427477	238441	238440	240548	--	--	--	-	-	-	-
M379T35_1_NEG	--	34.853	379.319	132648	196959	695675	44965	59547	35610.8	154703	134414	135331	--	--	--	-	-	-	-
M588T32_NEG	--	31.68	588.43	5725.95	90213.8	131490	331342	177372	131193	191303	196217	78842.7	--	--	--	-	-	-	-
M288T54_NEG	--	54.312	288.031	41241.2	20262.9	80153.6	1.42947e+06	554367	937558	644758	644107	712725	--	--	--	-	-	-	-
M381T26_1_NEG	--	26.336	380.989	21512.3	6085.67	8820.6	107711	7248.98	6775.2	21560.7	17703.9	21360.1	--	--	--	-	-	-	-
M353T48_NEG	--	48.065	353.304	76067.1	439358	348157	58015.4	44532.7	46844.9	97748.8	96049.5	91277.3	--	--	--	-	-	-	-
M699T138_NEG	--	137.805	698.511	276513	19114.7	65781.7	619071	589863	737347	121315	116576	116646	--	--	--	-	-	-	-
M398T28_NEG	--	28.414	398.26	5167.82	134927	322909	10868.2	9003.47	12876.5	9380.88	9384.29	9609.47	--	--	--	-	-	-	-
M95T118_NEG	--	117.658	94.9809	850789	1.07325e+06	1.48375e+06	1.93728e+06	1.5884e+06	2.33565e+06	1.4737e+06	1.7126e+06	1.70329e+06	--	--	--	-	-	-	-
M407T34_3_NEG	--	33.75	407.35	42426.5	125278	86419.3	25581.8	378975	17953.4	29711.9	29693	29276.5	--	--	--	-	-	-	-
M407T32_2_NEG	--	31.68	407.314	37565.3	75414.6	207870	215342	406577	273911	128348	128392	126121	--	--	--	-	-	-	-
M189T31_NEG	--	31.182	188.986	81613.3	11341.8	29428.1	152376	461130	316611	164814	145857	147345	--	--	--	-	-	-	-
M377T32_2_NEG	--	32.34	377.235	44857.9	347753	189979	75964.8	132529	104734	189864	189958	177108	--	--	--	-	-	-	-
M485T38_NEG	--	37.983	485.325	32080.4	245245	553465	278290	190551	227997	294604	294550	322752	--	--	--	-	-	-	-
M401T32_1_NEG	--	32.032	401.161	10994.6	8830.07	100289	261083	60370	38832.5	142482	84869.5	98250.7	--	--	--	-	-	-	-
M508T181_NEG	--	180.588	508.339	257591	68174.7	358959	301037	521755	511504	325131	332224	325170	--	--	--	-	-	-	-
M308T32_2_NEG	--	32.439	308.077	27550.5	980454	419051	8302.74	3507.16	10664.7	8300.47	8375.94	8867.77	--	--	--	-	-	-	-
M269T67_NEG	--	67.167	269.248	150741	1.45871e+06	473456	100830	68892.5	105688	316372	330764	316424	--	--	--	-	-	-	-
M395T68_NEG	--	68.321	395.245	6318.41	1.43874e+06	195279	11477.3	12416.8	10678.2	75607.6	70760	70791.7	--	--	--	-	-	-	-
M273T207_NEG	--	206.721	273.006	13049.2	5046.07	10867.3	531041	226955	229090	206945	206945	203108	--	--	--	-	-	-	-
M129T56_NEG	--	56.262	129.055	1.77642e+06	726848	460688	188390	96150.2	158127	248098	248064	240786	--	--	--	-	-	-	-
M763T38_1_NEG	--	38.028	762.507	395819	15293	15676	51668.2	63153.1	74080.9	88110.6	88111.8	87301	--	--	--	-	-	-	-
M540T27_NEG	--	26.9905	540.341	59247.7	243101	366658	245758	219036	200107	211496	211605	198213	--	--	--	-	-	-	-
M353T25_1_NEG	--	24.73	353.199	112393	53341.5	35740.6	170627	157827	100141	153424	145285	138865	--	--	--	-	-	-	-
M355T49_NEG	--	49.098	355.32	368493	838891	861604	392099	278694	274050	297705	297769	292634	--	--	--	-	-	-	-
M850T34_2_NEG	--	34.163	849.564	180409	9288.8	29736.1	28684.4	39777.5	35527.9	36101.9	37514	36124.4	--	--	--	-	-	-	-
M553T26_NEG	--	25.6305	553.354	50885.8	331480	224920	307862	220569	174242	148487	146957	146952	--	--	--	-	-	-	-
M77T682_NEG	--	682.22	76.9701	833075	608092	672963	505762	642284	902874	517162	559374	559393	--	--	--	-	-	-	-
M390T31_3_NEG	--	31.393	390.343	59314.2	37296.9	10286.6	220105	138892	124427	89254.2	89312.5	86013.7	--	--	--	-	-	-	-
M194T56_NEG	--	56.431	194.012	865793	31844.3	129884	70902.8	85298	69898.6	595836	596227	566704	--	--	--	-	-	-	-
M578T183_NEG	--	183.083	578.345	222926	79661.2	559863	244871	372451	295530	409613	403730	403660	--	--	--	-	-	-	-
M429T176_2_NEG	--	175.913	429.294	45707	500357	211139	69541.6	86313.2	68736.2	144581	144644	141900	--	--	--	-	-	-	-
M847T34_1_NEG	--	33.513	846.536	183568	3952.36	6506.54	6488.92	19954	17887.2	26538	29047.9	26471.4	--	--	--	-	-	-	-
M688T170_NEG	--	170.332	687.542	451191	15659.6	18139.9	44475.8	85319.3	132563	63642.6	56346.4	56583.1	--	--	--	-	-	-	-
M615T33_1_NEG	--	32.763	614.522	24026.7	281553	252168	12815.4	10649.3	101406	42374.3	42374.8	40196	--	--	--	-	-	-	-
M507T151_NEG	--	150.611	507.27	271974	263552	404738	355698	481564	405386	286027	285597	353060	--	--	--	-	-	-	-
M485T219_NEG	--	219.001	485.325	13524	311215	605500	104289	81719.4	92216.5	160807	158133	158146	--	--	--	-	-	-	-
M101T62_NEG	--	62.237	101.06	39382.6	399696	594940	199273	202494	309182	315439	309936	309759	--	--	--	-	-	-	-
M493T138_NEG	--	137.736	493.291	30726.4	327367	706462	327162	273339	220718	257840	251844	257605	--	--	--	-	-	-	-
M123T62_NEG	--	61.951	122.975	2.34789e+06	489099	1.84869e+06	1.85041e+06	3.28224e+06	2.77796e+06	5.46105e+06	5.53124e+06	5.53103e+06	--	--	--	-	-	-	-
M739T38_NEG	--	37.606	738.507	573926	14392.9	34763.5	113601	161588	180416	127216	125431	127185	--	--	--	-	-	-	-
M826T33_1_NEG	--	32.623	825.565	169920	18699.7	29946.8	39822.3	30541.5	35289.6	46699.8	40507.3	40522.2	--	--	--	-	-	-	-
M290T31_NEG	--	30.692	289.979	30217.5	4915	14144.8	5497.99	6928.82	6589.3	6987.91	7007.83	7309.31	--	--	--	-	-	-	-
M524T231_NEG	--	230.737	524.297	201455	64492.2	101824	150713	215614	149087	153545	153359	151991	--	--	--	-	-	-	-
M677T35_2_NEG	--	35.328	677.475	33931.6	70435.2	247133	75674.1	64323.5	56559.2	55564.4	53281.6	55463.2	--	--	--	-	-	-	-
M271T440_NEG	--	439.591	271.056	95546.2	1639.57	2219.43	3329.32	3415.38	3697.06	21202.7	21183.8	21542.3	--	--	--	-	-	-	-
M523T149_NEG	--	148.848	523.301	15205.3	189659	481161	52965.8	47298.7	43854.8	66062	68000	66057.2	--	--	--	-	-	-	-
M523T148_NEG	--	148.31	523.323	22488.6	6386.07	530856	58805.1	43947.7	48580.7	85987.4	82878.1	86552.5	--	--	--	-	-	-	-
M77T702_NEG	--	702.187	76.9701	1.00074e+06	472935	530622	1.8125e+06	838471	562629	446487	466963	466981	--	--	--	-	-	-	-
M353T52_NEG	--	51.6415	353.032	7583.12	104735	1.17735e+06	65665.8	66436.9	46712.2	139490	136637	136622	--	--	--	-	-	-	-
M310T55_NEG	--	55.4385	310.107	5799.8	10158.5	6412.11	180484	134261	256937	145084	145124	143307	--	--	--	-	-	-	-
M791T35_NEG	--	35.005	791.486	172036	7459.5	29386.4	15134.2	33943.7	40365.6	44401.1	44395.4	45651	--	--	--	-	-	-	-
M511T28_NEG	--	27.883	511.271	27650.8	150293	152811	189455	102724	113710	119480	115700	119630	--	--	--	-	-	-	-
M395T24_NEG	--	23.861	395.261	36494.9	11088.6	9189.26	8883.37	47361.3	10912.8	55504.1	46510.3	55536.1	--	--	--	-	-	-	-
M337T167_NEG	--	167.07	337.037	13892.7	43931.5	77576.6	545572	445821	526337	240848	236300	236216	--	--	--	-	-	-	-
M347T32_3_NEG	--	32.282	347.294	96171.1	20482.3	37222.3	272230	208724	172796	167835	168264	163652	--	--	--	-	-	-	-
M347T35_NEG	--	34.903	347.257	14504.4	47066.7	33919.6	47662.7	48926.8	38860.7	167337	104589	168828	--	--	--	-	-	-	-
M487T26_NEG	--	25.649	487.271	128944	41499.9	78838.6	322814	348126	336827	253835	255819	253839	--	--	--	-	-	-	-
M752T134_NEG	--	133.684	751.546	633522	12010.5	46974.7	137679	142756	206569	87575.4	85512.8	85562.8	--	--	--	-	-	-	-
M577T33_NEG	--	33.4745	577.497	66133.3	9252.63	4968.29	80426.5	79189.7	41438.2	79321.2	74933.9	79333.4	--	--	--	-	-	-	-
M101T111_NEG	--	111.208	101.024	1.34319e+06	35125.9	35438.9	24761.7	2878.21	21079.8	19044.3	19944.2	20210.9	--	--	--	-	-	-	-
M500T186_NEG	--	186.252	500.276	259276	32001.6	186011	47054.9	108268	102460	359484	363446	359486	--	--	--	-	-	-	-
M626T30_2_NEG	--	29.514	626.479	9922.91	256849	218172	111196	76049.2	59734.3	64941.5	63500.5	63470.8	--	--	--	-	-	-	-
M403T32_2_NEG	--	31.659	403.356	53935.3	17746.7	14607	201180	143117	77290.1	54269.8	57375.3	54230.6	--	--	--	-	-	-	-
M507T36_NEG	--	36.483	507.271	138534	81835.7	88292.1	140658	189767	185966	195670	188147	195646	--	--	--	-	-	-	-
M493T36_NEG	--	36.089	493.291	32365.9	46496.7	163597	139438	115031	139234	114297	111443	114325	--	--	--	-	-	-	-
M463T33_6_NEG	--	32.7695	463.376	83698.5	280439	380633	67035.4	42846.5	43489.2	272457	272396	261673	--	--	--	-	-	-	-
M661T31_4_NEG	--	31.2435	661.487	11193.1	284971	443931	47556.2	33978.4	38853.5	36824.7	35923.9	37484.8	--	--	--	-	-	-	-
M447T59_NEG	--	58.82	447.286	16521.3	146690	453894	72925	652124	234808	244802	245150	229478	--	--	--	-	-	-	-
M255T107_NEG	--	107.311	255.232	292328	2.56809e+06	371460	405314	282955	257301	356406	371485	356474	--	--	--	-	-	-	-
M388T29_NEG	--	28.85	388.215	6546.84	180160	276814	13069.1	15784.5	14382.5	102241	101065	101091	--	--	--	-	-	-	-
M1068T96_NEG	--	96.384	1067.52	261.97	254303	811616	21072.2	14197.9	11741.9	62853	61693.8	61692.3	--	--	--	-	-	-	-
M407T109_NEG	--	108.973	407.314	7454.09	377817	859757	20634.8	23672.8	25005.3	56224.4	55714.1	55381.8	--	--	--	-	-	-	-
M209T33_NEG	--	33.4955	209.081	14812.7	4240.06	21345.9	254681	93789.6	192147	126721	126684	123711	--	--	--	-	-	-	-
M157T315_NEG	--	314.8	157.013	171532	198447	194171	243792	105468	563432	984289	982779	982779	--	--	--	-	-	-	-
M157T309_NEG	--	309.02	156.99	1.60996e+06	157509	487449	452413	642593	612929	1.06448e+06	1.10398e+06	1.10403e+06	--	--	--	-	-	-	-
M135T210_NEG	--	209.896	135.03	998248	41876.9	81435.3	102418	140059	121486	383977	379324	379400	--	--	--	-	-	-	-
M549T98_NEG	--	98.2655	549.248	5932.4	290138	910541	55565.6	30078.6	41646.5	97152.6	96968.1	102422	--	--	--	-	-	-	-
M263T190_NEG	--	189.808	262.986	82275	90547.8	80082.9	350973	210516	253207	154302	151626	154303	--	--	--	-	-	-	-
M393T25_NEG	--	25.48	393.063	25188	11897	20428.6	357618	403658	376947	204936	204957	202189	--	--	--	-	-	-	-
M469T31_1_NEG	--	31.163	469.079	2408.81	10580	36035.8	28999.2	41170.3	369673	33098.2	31315.1	31505.6	--	--	--	-	-	-	-
M437T31_2_NEG	--	30.959	437.324	10753.5	58014.9	95300.1	51289.6	38571.8	34928.8	41821.2	44465.7	52826.3	--	--	--	-	-	-	-
M128T294_2_NEG	--	294.096	128.035	590895	75338.3	152094	133630	179787	174942	274464	277654	274466	--	--	--	-	-	-	-
M383T52_NEG	--	51.903	383.278	14027.1	29861.5	440542	44298.7	73505.7	44687.7	109804	107002	109827	--	--	--	-	-	-	-
M369T129_NEG	--	129.104	369.299	126435	1.17071e+06	1.55672e+06	490477	262709	269905	418034	415324	456945	--	--	--	-	-	-	-
M297T29_NEG	--	29.103	297.079	7363.23	18208.7	49456	112360	18115.8	84865.5	27790.9	53236.5	52912.3	--	--	--	-	-	-	-
M489T25_NEG	--	24.779	489.301	72622.6	337757	265483	138906	107694	115701	160511	157612	160036	--	--	--	-	-	-	-
M613T25_NEG	--	25.0495	613.449	24079.9	237125	220963	159624	134326	95514.1	79483.4	88007.8	79707.1	--	--	--	-	-	-	-
M409T33_2_NEG	--	33.169	409.33	193408	280552	335582	58671.1	131015	121383	121287	121248	120925	--	--	--	-	-	-	-
M399T33_1_NEG	--	33.1145	399.074	15113.2	11205.9	12302.6	259408	153126	271389	147021	147021	147574	--	--	--	-	-	-	-
M399T29_2_NEG	--	29.004	399.11	2732.72	17115.4	25716.9	233917	20025.6	9334.49	166300	168818	168903	--	--	--	-	-	-	-
M443T25_NEG	--	24.693	443.245	95551.3	39234.9	110804	289324	305600	278290	232729	232723	229004	--	--	--	-	-	-	-
M667T32_NEG	--	32.3855	667.35	6036.77	745022	29488.9	26833.3	30059.7	23727.5	152657	156151	151541	--	--	--	-	-	-	-
M667T31_2_NEG	--	30.604	667.386	16930.1	637997	54440.7	39372.5	45958.4	51885.8	103125	51499.6	67676.7	--	--	--	-	-	-	-
M335T32_1_NEG	--	31.969	335.115	13679.3	54273	190070	48338.4	50543.1	42829.3	56225.9	55763.6	51200.5	--	--	--	-	-	-	-
M619T236_NEG	--	236.336	619.287	114139	10086.8	94457.9	7420.19	9728.31	10821.2	84280.8	84277.1	85460.6	--	--	--	-	-	-	-
M773T132_NEG	--	132.29	772.527	380371	8374.37	31094.7	26423.3	37538.5	51950.4	87098.1	85385.4	87153.2	--	--	--	-	-	-	-
M551T49_NEG	--	48.621	551.303	52227.1	1.97741e+06	1.31259e+06	223846	37325.5	230915	241726	242142	210676	--	--	--	-	-	-	-
M203T432_NEG	--	431.946	203.056	117559	81445.7	75870	201484	179560	287911	293937	294443	293149	--	--	--	-	-	-	-
M180T24_NEG	--	23.6185	179.997	1011.38	7351.24	9105.41	50865.3	365016	132992	25257.8	28063.5	28037.2	--	--	--	-	-	-	-
M353T25_2_NEG	--	25.085	353.267	129515	24300.8	24341.7	354753	195097	187039	140405	142181	140389	--	--	--	-	-	-	-
M382T26_2_NEG	--	26.292	382.266	7843.86	54212.8	28226.4	8577.32	11441.9	17748.1	15872.2	11338	9902.36	--	--	--	-	-	-	-
M691T73_NEG	--	73.1385	691.491	43520.8	505950	1.01992e+06	95386	47307.2	49930.8	32224	33469.4	32273.9	--	--	--	-	-	-	-
M591T24_NEG	--	24.073	591.334	19550.6	305929	216910	101519	79719.5	93383.1	139011	138673	138673	--	--	--	-	-	-	-
M707T36_NEG	--	36.0895	707.485	53459.4	79201.7	191668	133153	105116	75823.6	71051.5	67133.3	67160.5	--	--	--	-	-	-	-
M341T82_NEG	--	81.716	341.053	15148.2	33904.3	11471.5	701276	1.08962e+06	974920	556646	555327	556205	--	--	--	-	-	-	-
M171T53_2_NEG	--	52.808	171.139	174727	257507	312229	386524	117326	434228	240585	240581	239483	--	--	--	-	-	-	-
M220T95_NEG	--	94.5895	220.146	327220	389644	238976	463395	424277	714558	528837	473016	472953	--	--	--	-	-	-	-
M263T251_NEG	--	251.387	262.986	70580.3	84102.8	130365	399372	170468	226970	202056	197579	197578	--	--	--	-	-	-	-
M777T36_NEG	--	36.108	776.551	334832	14475.4	48834.1	82289.7	62310	68000.7	47885.9	46825	47525.6	--	--	--	-	-	-	-
M80T77_NEG	--	77.11	79.9572	1.07085e+06	302845	620478	611784	1.12228e+06	1.54141e+06	1.93493e+06	1.69682e+06	1.69902e+06	--	--	--	-	-	-	-
M80T421_NEG	--	421.095	79.9571	156341	38536.7	36238.3	230750	213820	237158	177291	177875	178153	--	--	--	-	-	-	-
M697T34_NEG	--	34.4815	697.484	82342.6	5869.12	9573.58	72866.7	83014.8	74567.9	40158.9	40190.6	43868.2	--	--	--	-	-	-	-
M725T32_1_NEG	--	32.3315	724.5	58275.5	7261.49	14055.7	22878.3	26975.8	22597.8	20034.9	20065.6	18877.8	--	--	--	-	-	-	-
M549T26_1_NEG	--	26.15	549.287	47984.3	377928	393085	181762	187530	171377	253949	250165	253947	--	--	--	-	-	-	-
M393T33_1_NEG	--	32.713	393.12	1822.07	6980.3	6113.38	91255	3217.96	6618.7	13726.1	26835.3	14840.5	--	--	--	-	-	-	-
M598T28_NEG	--	28.3085	598.448	6574.61	336548	107822	35836.3	31812.3	24275.8	72845.8	71198.1	72827.2	--	--	--	-	-	-	-
M302T472_NEG	--	471.703	302.051	164366	3328.03	8509.04	4497.2	9846.17	9422.88	47066.4	46340.6	46340.6	--	--	--	-	-	-	-
M577T24_NEG	--	23.624	577.318	15145.7	284477	164252	97243	62120.4	78898.8	113523	113520	116370	--	--	--	-	-	-	-
M152T174_1_NEG	--	174.366	152.002	137967	55379.8	247504	33701.8	110903	97773.8	254428	254428	255370	--	--	--	-	-	-	-
M845T170_NEG	--	170.46	845.398	1645.43	412666	10670.2	7652.4	6603.73	8869.63	52447.3	50965.6	50939.6	--	--	--	-	-	-	-
M377T103_NEG	--	103.317	377.053	19924.3	54983.2	55628.4	673041	515299	764870	377396	373103	347544	--	--	--	-	-	-	-
M339T35_1_NEG	--	35.39	339.252	14572.9	16287.5	30201.4	50839.7	29858.7	37630.1	47501.6	57761.1	50035.2	--	--	--	-	-	-	-
M102T393_2_NEG	--	393.035	102.056	655521	50703.9	92944.5	52348	79862.6	82585.4	229626	229541	215189	--	--	--	-	-	-	-
M196T115_NEG	--	114.769	196.01	3.64909e+06	143229	159720	442501	337046	311799	450326	444306	283805	--	--	--	-	-	-	-
M791T37_NEG	--	37.153	790.55	336303	31837.6	71366.2	48749.5	72059.8	137241	93768.6	94343.9	93645.3	--	--	--	-	-	-	-
M791T38_NEG	--	37.579	790.538	263695	19847.2	45326.3	25788.1	19891.6	34598	57746.6	45828.4	57547	--	--	--	-	-	-	-
M341T36_1_NEG	--	35.7625	341.231	9546.68	65945.1	5053.41	227560	206383	22581.9	15789.8	15809.5	15811.9	--	--	--	-	-	-	-
M115T84_NEG	--	83.785	115.076	482767	1.17503e+06	765597	581866	541816	637914	574559	574442	562202	--	--	--	-	-	-	-
M587T25_NEG	--	25.293	587.434	28153.9	53900.1	349395	207486	157007	102972	121016	125576	125567	--	--	--	-	-	-	-
M422T36_NEG	--	35.7005	422.272	3013.72	4496.63	126152	22518.7	16588.5	22289	23939.2	27643.7	24063.3	--	--	--	-	-	-	-
M673T25_NEG	--	24.969	673.448	13291.8	143242	16033.8	23585.8	12742	17884.9	20182.2	22388.4	22958.6	--	--	--	-	-	-	-
M383T29_NEG	--	28.958	383.006	27427.3	4354.61	16673.1	367625	116654	114969	121613	120151	121211	--	--	--	-	-	-	-
M495T159_NEG	--	158.71	495.115	861067	6805.54	7200.95	63075	115924	133066	218306	220999	221000	--	--	--	-	-	-	-
M369T34_2_NEG	--	34.048	369.335	80425.1	62707.5	230111	92871.9	88806.6	103573	74448.3	75034.2	74129.6	--	--	--	-	-	-	-
M369T35_NEG	--	35.2385	369.299	33986.4	74465.5	197947	136964	64514.8	67217.3	90070.2	88237.2	88224.4	--	--	--	-	-	-	-
M653T32_4_NEG	--	32.224	653.371	13765.3	55475.1	137379	217446	120091	105699	68544.2	68363.2	68684.4	--	--	--	-	-	-	-
M465T146_NEG	--	145.861	465.141	9508.79	7625.49	22367.7	600038	144734	332123	215018	202657	214924	--	--	--	-	-	-	-
M343T23_NEG	--	23.4695	343.044	7291.46	7433.09	36823.9	194291	197424	217223	129487	129483	126974	--	--	--	-	-	-	-
M199T36_NEG	--	36.1285	199.17	85756.1	166868	228748	173966	183014	217958	180644	178522	180634	--	--	--	-	-	-	-
M222T28_NEG	--	27.745	221.587	5822.22	44740.6	44740.6	90554.3	84646.2	87565.4	47722.1	46708.1	47734.2	--	--	--	-	-	-	-
M278T38_NEG	--	37.793	278.247	31943.5	10934.9	4741.01	13564.6	168741	11085.3	10334.7	10235.9	12202.3	--	--	--	-	-	-	-
M683T24_NEG	--	23.629	683.36	2113.79	45496.3	30730.5	126264	139687	152999	93413.6	82767.9	82970	--	--	--	-	-	-	-
M529T33_2_NEG	--	32.8725	529.35	10182	52507.7	80649.4	93580.8	167590	74942.1	84478.6	88699.9	84394.6	--	--	--	-	-	-	-
M381T25_3_NEG	--	24.83	381.299	163889	32170	27398.9	238044	138161	112603	111149	110248	104075	--	--	--	-	-	-	-
M817T38_NEG	--	38.0125	816.573	213645	2848.82	17899.1	59093.5	77048.2	91007	63599.9	63570.9	64724.7	--	--	--	-	-	-	-
M475T59_NEG	--	59.001	475.162	10163.8	37022.8	60277.6	224146	59300.4	595328	394796	395626	299641	--	--	--	-	-	-	-
M129T72_2_NEG	--	71.588	129.092	199378	984890	207992	287614	103671	212005	236165	236224	223999	--	--	--	-	-	-	-
M261T30_NEG	--	29.976	261.006	20207.2	7491.48	17509.3	75009	234922	208780	138560	142150	138620	--	--	--	-	-	-	-
M187T272_NEG	--	272.12	187.041	752087	4598.55	57112.7	575005	280941	693492	351485	288034	269871	--	--	--	-	-	-	-
M323T28_2_NEG	--	27.962	323.058	11949.2	25763.7	53475.7	215661	183321	218607	116241	116235	119048	--	--	--	-	-	-	-
M369T48_NEG	--	47.708	369.299	34455.5	165429	414974	313267	68802.2	75851.1	90042.7	89871.2	89871.2	--	--	--	-	-	-	-
M464T25_1_NEG	--	24.779	463.846	12181.4	247302	67603.4	14427	10440.1	9049.42	40661.4	40749.4	42801.4	--	--	--	-	-	-	-
M315T25_NEG	--	25.131	315.047	111118	173635	77837.1	397532	54267	286720	130108	132216	132254	--	--	--	-	-	-	-
M485T62_NEG	--	62.361	485.325	35994.6	1.19761e+06	867332	544438	321349	287742	406789	384550	385047	--	--	--	-	-	-	-
M654T127_NEG	--	126.824	653.509	39474.2	444266	599679	122879	66778.5	45607.9	34182.7	33861.2	34754.1	--	--	--	-	-	-	-
M308T33_NEG	--	33.06	308.295	100280	76443	5002.25	44451.2	17129.7	19151.8	22111.7	19200.4	22096	--	--	--	-	-	-	-
M323T168_NEG	--	168.278	323.043	27072.3	26640.3	11032.3	412653	205515	391407	211782	211086	210773	--	--	--	-	-	-	-
M377T24_NEG	--	24.154	377.068	15820.3	8576.78	8288.28	217064	148507	180455	117313	121042	121087	--	--	--	-	-	-	-
M254T39_NEG	--	38.6455	254.248	12752.5	53964.6	1779.5	7422.1	6822.65	5036.06	6230.78	5959.44	6230.93	--	--	--	-	-	-	-
M866T34_NEG	--	34.0845	865.502	122605	5507.8	12208.2	20138.2	35532.7	23677.4	31095.9	31970.9	31094.3	--	--	--	-	-	-	-
M884T168_NEG	--	167.594	883.532	565860	9674.48	37704	40807.3	63129.8	72118.2	129640	129639	129087	--	--	--	-	-	-	-
M217T28_NEG	--	28.414	217.017	106299	10735.6	17487.6	327403	268859	276405	200022	202268	202268	--	--	--	-	-	-	-
M646T31_3_NEG	--	31.403	646.473	32053.6	66449.6	513208	98838	83313.3	56206.5	67059.4	60751.5	67249.6	--	--	--	-	-	-	-
M586T34_NEG	--	33.9445	586.493	12198.3	204353	3811.52	11322	11246	15079	14454	15584.5	21718	--	--	--	-	-	-	-
M677T74_NEG	--	73.937	677.475	33500.3	413248	681474	117557	43288	53788.2	40559	38401.6	38319.8	--	--	--	-	-	-	-
M526T27_2_NEG	--	26.779	526.326	84231.4	214494	426325	362492	357253	364686	352170	351125	352167	--	--	--	-	-	-	-
M602T180_NEG	--	180.052	602.344	103362	19234.3	100365	25414.1	41993.5	37680	120478	122756	120478	--	--	--	-	-	-	-
M737T36_NEG	--	36.3635	736.523	218315	10201.2	27538.6	41700.5	48642.7	59820.2	56614.5	53578.3	56600.6	--	--	--	-	-	-	-
M654T30_3_NEG	--	29.76	654.475	13351.7	117087	168531	142710	104893	92206.7	59014.2	58592.9	58703.8	--	--	--	-	-	-	-
M412T31_2_NEG	--	31.403	412.31	2148.73	78719.3	232844	9639.81	9703.36	11599.4	11553.5	9993.85	11583.9	--	--	--	-	-	-	-
M412T33_1_NEG	--	33.4745	412.25	3088.18	829.591	58005.5	1679.6	2220.92	10629.5	5274.38	8991.92	5686.43	--	--	--	-	-	-	-
M793T38_NEG	--	37.9175	792.549	209590	6466.36	34514.5	36441	46955.8	54977	62505.4	61476.3	62510.9	--	--	--	-	-	-	-
M395T35_2_NEG	--	34.928	395.315	34383.5	62019.6	190027	49840.8	134535	110786	82779.4	82275.9	82214.1	--	--	--	-	-	-	-
M365T36_NEG	--	36.036	365.34	211815	131823	112895	51254.2	44815.8	44253.8	74551.5	70014.8	70036.7	--	--	--	-	-	-	-
M153T25_NEG	--	25.0755	153.018	142526	59287.6	60696.2	247706	287509	278489	192230	199334	199348	--	--	--	-	-	-	-
M497T34_NEG	--	33.6265	497.361	90458.2	77469.7	42212.4	135965	139547	67520.6	104374	109896	104434	--	--	--	-	-	-	-
M506T181_NEG	--	181.496	506.323	135430	161817	292173	195312	308542	309114	259181	264119	264108	--	--	--	-	-	-	-
M460T122_NEG	--	121.568	460.308	6877.32	639337	354265	17588.6	16308.9	18734.6	73755.1	68860.8	73821.1	--	--	--	-	-	-	-
M61T644_NEG	--	644.119	60.9932	127791	2.16771e+06	136520	769257	608006	628659	382996	378951	344912	--	--	--	-	-	-	-
M642T30_NEG	--	30.334	642.475	29007.5	382595	585881	184073	139015	106877	95228.7	95243.3	92634	--	--	--	-	-	-	-
M244T29_NEG	--	29.119	244.004	3414.54	1428.77	4181.78	24664.5	340821	15012.3	10737.8	11587.1	11586.5	--	--	--	-	-	-	-
M471T31_2_NEG	--	31.059	471.24	253736	18796.4	61067.9	182393	167068	187321	160710	160726	157376	--	--	--	-	-	-	-
M362T34_2_NEG	--	34.033	362.266	120525	35203.3	33026.5	116629	71017.1	131553	125397	118468	125203	--	--	--	-	-	-	-
M80T116_NEG	--	115.871	79.9573	708006	341098	644298	914777	819755	754327	652065	591281	593121	--	--	--	-	-	-	-
M662T35_2_NEG	--	34.903	662.468	7052.78	195428	245028	46606.1	40543.7	38652.2	60143.6	60093.1	61564.9	--	--	--	-	-	-	-
M756T34_1_NEG	--	34.43	755.521	34317.6	10509.5	25542.6	94428.2	112995	103182	38349.6	38361	38914.4	--	--	--	-	-	-	-
M640T35_NEG	--	34.79	640.498	4542.44	124453	140803	36486	23543.7	59906.2	45705.8	44740.6	45712.8	--	--	--	-	-	-	-
M533T31_3_NEG	--	30.93	533.291	144363	175008	199827	189068	191346	167684	227527	227526	226120	--	--	--	-	-	-	-
M449T28_NEG	--	27.829	449.326	37238.3	18962.5	44346.7	69126.9	52667.2	46038.7	37634.6	37705.1	32759.8	--	--	--	-	-	-	-
M770T49_NEG	--	48.626	769.501	353122	28625	70085.1	69412.5	84978.9	107720	88302.1	88063.6	87966.4	--	--	--	-	-	-	-
M441T37_NEG	--	37.382	441.335	22097.3	396062	277138	121704	74489.2	81838.8	152625	158677	152606	--	--	--	-	-	-	-
M199T33_NEG	--	32.713	199.007	124696	28467.7	99405.9	125804	127709	107711	128551	124828	128684	--	--	--	-	-	-	-
M473T24_NEG	--	23.672	473.278	78144.3	73933.9	106976	118890	97573.8	117545	111736	112745	111734	--	--	--	-	-	-	-
M328T37_NEG	--	37.153	328.234	153109	6917.46	27315.8	17521.9	19866.2	22927.7	45694.7	47575.7	45685.7	--	--	--	-	-	-	-
M614T31_NEG	--	30.583	614.445	27179.4	132582	254612	138954	93469.3	95269.8	99943.7	99833.3	104011	--	--	--	-	-	-	-
M311T174_NEG	--	174.074	311.222	232371	197244	82424.5	442337	393189	502592	293744	287494	287437	--	--	--	-	-	-	-
M229T211_NEG	--	211.028	229.107	703.302	88856.5	410481	9981.74	9888.93	20336	31327.3	31128.6	31327.6	--	--	--	-	-	-	-
M477T155_NEG	--	155.003	477.102	16172.3	13376.7	44238	497907	105347	181823	111786	115872	115843	--	--	--	-	-	-	-
M257T46_NEG	--	46.338	257.239	178108	242215	250473	150299	213875	249803	179240	176515	179241	--	--	--	-	-	-	-
M369T47_NEG	--	47.04	369.335	101560	231003	386744	74595.8	47790.1	76246.6	47943.5	47609	47610.9	--	--	--	-	-	-	-
M460T180_NEG	--	180.103	460.281	64423.1	33857.4	102877	198442	300544	278473	162832	165470	162840	--	--	--	-	-	-	-
M144T24_NEG	--	23.5535	143.901	411.153	9518.3	12783.9	73120.6	316326	125501	29445.9	30980.5	30981.5	--	--	--	-	-	-	-
M220T655_NEG	--	654.519	220.146	242062	192480	105525	106400	142919	125592	125755	128789	149441	--	--	--	-	-	-	-
M381T27_NEG	--	26.979	381.262	97949.3	11541	35822.4	71725.6	64736.8	69729	50592.8	51642.9	51640.2	--	--	--	-	-	-	-
M394T32_1_NEG	--	32.253	394.059	5719.91	6134.5	11742.5	105741	185533	109065	67346.1	77981.2	68126.2	--	--	--	-	-	-	-
M77T4_NEG	--	4.3625	76.9701	617751	551150	563105	592913	531050	506906	501461	423488	501147	--	--	--	-	-	-	-
M825T35_1_NEG	--	34.544	824.55	127005	7753.85	12636.9	13397.1	27637.3	27081	24891	24890.2	25142.4	--	--	--	-	-	-	-
M267T232_NEG	--	231.613	267.072	1.09304e+06	25402.2	141151	331836	625542	824637	567751	636682	636429	--	--	--	-	-	-	-
M275T30_NEG	--	29.722	275.168	188222	37454.8	40242.3	167048	160668	82228.6	122124	121313	121317	--	--	--	-	-	-	-
M277T36_NEG	--	36.367	277.037	18686.3	17642.9	46321.2	405637	177444	121542	106798	104013	103945	--	--	--	-	-	-	-
M77T16_NEG	--	16.225	76.9699	763112	892611	772674	995316	1.03912e+06	874393	599200	597130	495075	--	--	--	-	-	-	-
M135T37_NEG	--	36.799	135.044	20224.1	8349.37	24566.6	127175	68423.4	95548.7	35493.6	65234.6	66107.7	--	--	--	-	-	-	-
M703T29_1_NEG	--	28.9915	702.519	27133.7	64591.8	79755.7	39322.8	41909.8	41269.3	32708.8	30138.3	32728.3	--	--	--	-	-	-	-
M776T131_NEG	--	131.222	775.615	18749	4022.6	3305.88	3488.97	2365.39	20854.7	1754.29	1931.56	1918.49	--	--	--	-	-	-	-
M320T472_NEG	--	471.703	320.06	117734	2774.21	7203.62	3134.35	8589.24	7145.47	36271.3	37701.1	36264.4	--	--	--	-	-	-	-
M377T34_1_NEG	--	34.053	377.16	5351.71	10875.4	240925	53173.9	21408.6	38072.6	21743.4	21853.7	18677.3	--	--	--	-	-	-	-
M267T56_NEG	--	56.102	267.195	198536	25691.3	29352.9	22048.6	39213.6	25714.9	40351	39723.4	39770.7	--	--	--	-	-	-	-
M450T179_NEG	--	179.393	450.297	159776	30166.1	91236.6	228828	322281	283816	167120	167123	161933	--	--	--	-	-	-	-
M227T69_NEG	--	69.317	227.201	64998.3	516177	279389	54072	54059.8	67143.9	182961	187323	182953	--	--	--	-	-	-	-
M367T27_NEG	--	26.585	367.193	1160.46	18991.5	13856.3	2586.26	2344.17	3869.21	4742.35	5098.77	8721.88	--	--	--	-	-	-	-
M534T33_2_NEG	--	32.7975	534.486	71080	2297.05	1354.38	7592.69	10574.2	7818.55	7027.02	7327.7	7026.8	--	--	--	-	-	-	-
M259T187_NEG	--	186.847	258.991	13601.1	6155.1	150410	99746.3	55122.8	153737	86037.6	83645.6	86644.3	--	--	--	-	-	-	-
M277T285_NEG	--	285.031	277.001	9224.33	6000.21	14766.5	99105.4	75001.2	94595.8	73875.5	73874.1	73640.2	--	--	--	-	-	-	-
M321T44_NEG	--	43.533	321.027	13606.1	3399.08	14201.6	228449	94092.2	158416	106090	103880	103885	--	--	--	-	-	-	-
M483T187_NEG	--	186.763	483.312	6083.55	287197	636673	15625.1	35845.4	26035	96440.1	90157	90212.4	--	--	--	-	-	-	-
M679T134_NEG	--	134.354	678.504	6638.66	145740	341030	36351.8	16640.7	20624.5	25583.1	27520.9	27582.6	--	--	--	-	-	-	-
M439T36_NEG	--	35.8115	439.317	23472.9	179497	214336	45532.6	48725.9	30852.8	85021.2	86350.5	83076.8	--	--	--	-	-	-	-
M859T186_NEG	--	185.618	858.52	182841	5386.29	19734.6	26241.5	38308.7	30218.5	29083.1	28593	29085.6	--	--	--	-	-	-	-
M333T29_NEG	--	29.1535	333.207	4589.89	83422.4	63201.4	16252.9	26647.8	19326.6	55098.4	55060.8	49357.2	--	--	--	-	-	-	-
M792T34_NEG	--	34.168	792.49	89801.6	7010.9	13943.8	31898.6	17912	27927.6	24527.7	25791.5	25833.1	--	--	--	-	-	-	-
M487T173_NEG	--	173.319	487.338	14024.3	373030	665136	54672.8	39949.8	47664.2	127719	126767	126767	--	--	--	-	-	-	-
M409T29_NEG	--	29.342	409.057	17951.2	9567.42	17226.9	246571	160661	172959	139578	132056	139211	--	--	--	-	-	-	-
M215T29_NEG	--	28.632	215.019	52364.1	5382.38	9208.14	83256	43241	52193.3	42259.4	41095.9	42238.1	--	--	--	-	-	-	-
M467T36_1_NEG	--	36.145	467.276	16112.6	321595	97473.4	100001	85110.9	155490	97281	95265.6	97304.1	--	--	--	-	-	-	-
M399T27_NEG	--	26.982	399.225	12471.6	162200	125696	49839.8	37972.4	25635.7	52695.4	49388.4	48343.2	--	--	--	-	-	-	-
M185T36_NEG	--	36.108	185.154	18945.4	175504	60125.8	45356.3	9971.49	57335.9	67844.4	64729.1	64669.3	--	--	--	-	-	-	-
M296T37_NEG	--	37.153	296.266	33097.3	152487	112049	9291.59	31612.7	34508.1	81842.7	71757.9	82001.4	--	--	--	-	-	-	-
M178T40_2_NEG	--	39.697	178.087	2636.81	96639.1	178638	3395.15	5806.25	2840.22	22435.7	51138.5	50259.9	--	--	--	-	-	-	-
M367T315_NEG	--	315.417	367.058	64910.5	5418.62	183076	5977.63	5349.27	5859.89	5640.48	5617.68	5854.53	--	--	--	-	-	-	-
M841T38_NEG	--	38.318	840.574	201705	5722.92	14009.8	33248.6	42399.7	60694.5	66343.4	66351.5	65134	--	--	--	-	-	-	-
M696T138_NEG	--	137.687	696.496	111069	13643.5	22430.8	215595	215451	303989	66563.9	64241.6	64241.9	--	--	--	-	-	-	-
M413T34_1_NEG	--	34.4035	413.289	96208	42937.6	6621.59	80464.5	84420.7	77338.1	46847.3	44644.1	46740.3	--	--	--	-	-	-	-
M655T102_NEG	--	101.823	655.227	3280.46	10835.2	16135.2	177727	107828	101564	128637	113491	113144	--	--	--	-	-	-	-
M421T25_2_NEG	--	24.883	421.295	11543.2	35275.2	36816.9	49726.3	56801.1	63119.7	49089.4	49077.2	47508.6	--	--	--	-	-	-	-
M693T82_NEG	--	81.849	693.469	57147.1	693518	836733	260700	166818	135904	89012.5	85245.5	89084.9	--	--	--	-	-	-	-
M395T102_NEG	--	102.431	395.064	16133.8	75941.3	73287	559935	185712	220043	225834	218913	219528	--	--	--	-	-	-	-
M770T73_NEG	--	73.289	769.502	559990	62343.8	132699	159771	233813	237848	149343	145062	149379	--	--	--	-	-	-	-
M333T32_NEG	--	31.522	333.099	13351.5	5155.9	8018.33	45608.9	22291.3	50557.8	32809	35588.8	30780.9	--	--	--	-	-	-	-
M315T31_NEG	--	31.159	315.126	33157.2	398938	89085.6	135816	238934	112012	206287	193132	206488	--	--	--	-	-	-	-
M80T23_NEG	--	23.262	79.957	198941	24124.3	20191.8	141487	231856	179241	42508.8	69875.2	70636.3	--	--	--	-	-	-	-
M638T31_4_NEG	--	30.5885	638.444	2132.73	47595.7	7761.86	3598.88	7033.45	4577.13	6297.43	7896.73	6370.31	--	--	--	-	-	-	-
M289T440_NEG	--	439.547	289.066	57500.2	1107.29	1273.68	1005.6	1704.49	2026.8	11665.4	11650.8	10963.4	--	--	--	-	-	-	-
M591T450_NEG	--	449.666	591.187	63394	8827.77	30825.1	25991	75980.5	148042	71773.3	70309.2	71790.2	--	--	--	-	-	-	-
M148T24_NEG	--	24.293	148.025	14753.4	598.768	1582.27	48752.9	259983	92025.1	77408.7	77401	79053.2	--	--	--	-	-	-	-
M740T168_NEG	--	167.859	739.545	293880	8697.72	16034.1	70685.2	113956	128190	40200.6	40174.9	42868.1	--	--	--	-	-	-	-
M573T25_NEG	--	25.293	573.418	17777.7	231635	193129	138161	110469	93735	66035.1	75783.6	77143.8	--	--	--	-	-	-	-
M315T173_NEG	--	172.736	315.122	26934.8	37235.3	52312.7	176920	184313	222642	158537	158532	153578	--	--	--	-	-	-	-
M336T22_1_NEG	--	22.124	335.643	17627.3	117353	149396	62438.6	58561	53246.8	72109.3	72092.8	74186.9	--	--	--	-	-	-	-
M397T30_NEG	--	29.514	397.165	1142.17	19311.8	2414.8	6249.56	2227.96	3990.72	12340.4	17228.6	12078.1	--	--	--	-	-	-	-
M283T57_NEG	--	56.585	283.191	42235.7	111169	21555.7	21028.9	151171	27699.1	119502	119639	138902	--	--	--	-	-	-	-
M587T33_2_NEG	--	33.436	587.289	7758.36	145709	267864	78446.4	52184.1	42197.7	111172	111146	113819	--	--	--	-	-	-	-
M135T157_1_NEG	--	157.047	134.894	379626	241349	241185	302705	448704	332214	1.29395e+06	1.29451e+06	1.29451e+06	--	--	--	-	-	-	-
M135T173_NEG	--	173.305	134.894	205410	130250	135684	158489	137817	154795	425094	415099	415075	--	--	--	-	-	-	-
M329T22_1_NEG	--	22.071	328.636	12452.6	127650	136799	63667.6	50587.5	47352	73415.9	71719.1	73407.8	--	--	--	-	-	-	-
M366T389_2_NEG	--	388.715	366.107	558085	5596.72	34504	53743.3	122869	153535	250554	250555	249091	--	--	--	-	-	-	-
M581T28_NEG	--	27.753	581.312	19712.4	39143.6	56055.9	124005	133530	105022	92865.1	87508.5	92912.6	--	--	--	-	-	-	-
M75T108_NEG	--	108.095	75.0087	600717	47950.1	106419	40442.9	72663	66774.6	442524	435157	456094	--	--	--	-	-	-	-
M285T42_2_NEG	--	41.764	285.269	273738	228750	245449	163379	230675	153062	208456	208714	182578	--	--	--	-	-	-	-
M95T657_NEG	--	656.819	94.9804	257608	308321	82207.8	366762	136339	452233	471605	664912	706292	--	--	--	-	-	-	-
M471T60_NEG	--	59.6305	471.346	67155	686883	509551	652483	587173	492648	431921	434580	423070	--	--	--	-	-	-	-
M285T51_2_NEG	--	50.673	285.242	60453.7	317535	274658	91987.8	104141	74462.4	83036.7	66498.4	51973.6	--	--	--	-	-	-	-
M279T68_NEG	--	67.5595	279.232	294090	114588	128981	228396	347238	235640	380178	379629	397761	--	--	--	-	-	-	-
M425T27_2_NEG	--	27.376	425.235	32400.1	44661.2	87548.2	158094	137996	135702	120324	117725	117872	--	--	--	-	-	-	-
M547T35_NEG	--	35.302	547.359	5239.3	347071	31014	27057.2	28463.1	22932.5	25172.4	25150.5	26581.4	--	--	--	-	-	-	-
M764T37_NEG	--	36.691	763.511	216438	29907.6	38860.3	27630.7	32234.6	66105.5	69387.2	69078.5	67100.9	--	--	--	-	-	-	-
M189T235_NEG	--	234.597	189.04	112272	2650.78	4601.54	9805.11	7369.3	9684.25	14460.2	14673.5	14677.2	--	--	--	-	-	-	-
M551T24_2_NEG	--	24.354	551.337	9357.49	4121.09	14019.1	55814.5	49893.1	43251.5	34784.9	44596.6	46252.9	--	--	--	-	-	-	-
M815T72_NEG	--	71.979	815.497	8037.62	30902.2	47097.4	394263	181908	233840	88027.8	87894.5	94282.4	--	--	--	-	-	-	-
M335T32_2_NEG	--	32.4445	335.257	133110	207837	145856	31743.3	44264.4	28811.1	36714.8	37510.1	36709.9	--	--	--	-	-	-	-
M143T61_NEG	--	61.261	143.107	339193	401841	434182	452997	308597	537783	357411	356438	357409	--	--	--	-	-	-	-
M792T37_NEG	--	36.888	791.541	84200.3	24618.1	25293.4	37836.1	58638.7	60723	38914.4	39442.3	36873.1	--	--	--	-	-	-	-
M557T165_NEG	--	165.162	557.058	3370.97	3458.46	17250.6	305036	62096	139684	69691.7	68400.7	68394.9	--	--	--	-	-	-	-
M473T32_3_NEG	--	32.1285	473.324	23241.6	81549.6	105418	277361	98985.6	81983	108864	106853	108879	--	--	--	-	-	-	-
M448T32_3_NEG	--	32.1255	448.313	1583.5	6482.53	6727.66	6462.57	33316.8	3125.88	12061.8	8355.05	8958.33	--	--	--	-	-	-	-
M213T130_NEG	--	129.986	213.091	57743.8	685501	609015	666287	390436	403881	641016	641199	632388	--	--	--	-	-	-	-
M100T107_NEG	--	106.513	99.9251	242941	573905	233833	914957	281953	875021	2.2954e+06	2.28104e+06	2.28106e+06	--	--	--	-	-	-	-
M151T235_NEG	--	235.373	151.025	902053	72736.8	99053.5	77410.3	114600	119195	220581	214153	214017	--	--	--	-	-	-	-
M461T76_2_NEG	--	76.167	461.265	62006.5	62617.2	172086	33569.2	189541	77676.5	151079	149405	151087	--	--	--	-	-	-	-
M485T175_NEG	--	175.409	485.325	49587.2	571953	868766	313946	239734	297415	356304	420449	352614	--	--	--	-	-	-	-
M701T138_NEG	--	138.416	700.525	176981	10773.7	33432.7	368151	289228	357627	55298.9	53068	56072.1	--	--	--	-	-	-	-
M203T25_NEG	--	24.814	203.001	380764	1462.16	6671.99	170182	187125	183599	188617	188200	187070	--	--	--	-	-	-	-
M744T38_NEG	--	38.224	743.54	128308	11234.4	36134	90658.1	88318.5	128101	57356.3	60702.7	57417.8	--	--	--	-	-	-	-
M157T37_NEG	--	37.23	157.123	78011.4	53643	77195.6	161307	65376.8	161176	108713	113130	108715	--	--	--	-	-	-	-
M95T621_NEG	--	621.24	94.9803	364641	1.18782e+06	681734	159191	1.06257e+06	1.19343e+06	683665	497031	678698	--	--	--	-	-	-	-
M573T30_1_NEG	--	29.863	572.647	17327.1	328024	196120	5721.35	4703.1	3910.77	68022	66116.2	68010.5	--	--	--	-	-	-	-
M275T27_1_NEG	--	27.479	275.022	17754.7	6437.01	15638.3	204348	69530.3	96359.6	107688	107680	104879	--	--	--	-	-	-	-
M435T32_2_NEG	--	32.128	435.345	48720.1	151412	179816	133009	189720	120423	165487	167302	165477	--	--	--	-	-	-	-
M227T47_NEG	--	46.845	227.034	21133.1	346380	300738	149572	129734	111055	148263	140382	148508	--	--	--	-	-	-	-
M366T303_2_NEG	--	302.836	366.107	276728	51916.6	107609	330068	586753	374379	385011	378338	378405	--	--	--	-	-	-	-
M92T165_NEG	--	165.435	92.0251	594519	22900.4	44928.5	57242.8	99412.3	82892.3	246094	250811	250797	--	--	--	-	-	-	-
M669T25_NEG	--	25.439	669.405	4847.25	111988	157412	40359.2	23750	16966.4	21434.8	23042.7	22965	--	--	--	-	-	-	-
M497T33_2_NEG	--	32.7695	497.417	3924.56	43642.2	49874.2	6108.4	132968	10092.9	6802.66	5496.63	5530.5	--	--	--	-	-	-	-
M391T34_NEG	--	33.5275	391.25	132702	471549	392190	238682	207294	201010	316313	316319	314360	--	--	--	-	-	-	-
M363T33_2_NEG	--	32.95	363.109	19635.8	7573.49	11629.3	24514.7	34521.1	32954.2	54738.1	49820.7	53357.4	--	--	--	-	-	-	-
M364T122_NEG	--	121.616	364.251	9442.62	407153	111035	110282	99193.5	93914	93563.7	93545.6	92500.2	--	--	--	-	-	-	-
M445T32_4_NEG	--	32.1865	445.295	3542.82	6692.19	21896.2	7045.33	35860.2	7442.34	16546.1	13077.4	12807.6	--	--	--	-	-	-	-
M100T53_NEG	--	52.7525	99.9253	93292.3	69697.6	50314.4	75693.2	106358	78690.4	748633	744396	877580	--	--	--	-	-	-	-
M478T164_NEG	--	164.363	478.291	250357	169506	288385	264832	699508	647190	768010	768027	782394	--	--	--	-	-	-	-
M735T36_NEG	--	35.983	734.506	167285	45666.3	39915.4	66296.4	54085.1	113544	41538	41196.5	42521.2	--	--	--	-	-	-	-
M151T31_NEG	--	30.538	151.003	10201.1	16193.5	20024.4	130635	132195	122730	111161	104385	106612	--	--	--	-	-	-	-
M327T27_NEG	--	27.0865	327.124	6736.61	4457.58	7097.77	18580.2	29755.3	7779.88	8463.66	10263.7	11041.4	--	--	--	-	-	-	-
M359T30_NEG	--	29.709	359.042	4677.41	2327.79	13540.9	127764	103367	134347	67011.4	69116.9	69090.5	--	--	--	-	-	-	-
M455T156_NEG	--	156.392	455.239	7130.48	234543	261639	33272.9	72085.8	37402.3	62819.7	49615.9	49459	--	--	--	-	-	-	-
M409T30_NEG	--	30.003	409.26	88161.7	109851	54668.4	29009.3	71280.3	70190.9	26611	24807.1	24705.6	--	--	--	-	-	-	-
M343T30_2_NEG	--	29.624	343.01	18700.6	10549.4	39563.6	18450.5	23893.9	14559.7	84797.2	99091	47373.6	--	--	--	-	-	-	-
M678T35_3_NEG	--	35.283	678.48	15113.2	30661.7	93178.5	24907.7	28922.4	27143.9	24760.5	24192.1	23754.3	--	--	--	-	-	-	-
M175T421_NEG	--	421.097	174.937	123339	45934	33452.6	192028	166516	167773	143789	142415	142447	--	--	--	-	-	-	-
M377T33_3_NEG	--	32.783	377.303	97065.3	137636	236638	224988	166528	120146	247502	247464	245410	--	--	--	-	-	-	-
M247T348_NEG	--	347.952	246.98	449653	504370	737496	992696	986547	1.16414e+06	1.07876e+06	1.07671e+06	1.07672e+06	--	--	--	-	-	-	-
M363T53_NEG	--	53.449	363.072	13625.3	19674.9	80406.4	303801	203371	247134	438407	424307	438196	--	--	--	-	-	-	-
M100T17_NEG	--	17.339	99.9252	101492	42511.1	49777.6	152814	153519	88730.2	757354	785923	683931	--	--	--	-	-	-	-
M730T35_NEG	--	34.709	729.506	45176.6	22553	37521.8	54277.1	44085.6	43283.6	25533.5	25516.1	27626.9	--	--	--	-	-	-	-
M315T393_NEG	--	392.92	315.079	364498	1584.39	8592.88	4119.97	6159.18	9201.71	47951.5	45708.9	45692	--	--	--	-	-	-	-
M369T28_3_NEG	--	27.745	369.263	184106	30558.9	40112.8	111828	109673	109781	111303	111285	113243	--	--	--	-	-	-	-
M307T32_NEG	--	32.032	307.121	43944.8	53967.4	85926.4	288525	188668	341528	192420	193947	193943	--	--	--	-	-	-	-
M375T28_2_NEG	--	27.679	375.255	16945.6	26161.7	30281.1	103946	112786	106403	101841	100309	101847	--	--	--	-	-	-	-
M245T80_NEG	--	80.307	245.06	29852.7	170859	916917	9550.36	26705.4	28178.4	285889	285726	299824	--	--	--	-	-	-	-
M353T35_NEG	--	34.628	353.304	82548	71135.4	105508	130375	37073.1	45083.4	60892.9	55788.6	55980.5	--	--	--	-	-	-	-
M410T24_NEG	--	24.2295	410.276	9417.19	4284.13	14865.6	20562.7	10652.8	14789.8	26024	25577.9	26026.7	--	--	--	-	-	-	-
M173T123_NEG	--	123.233	172.957	13571.1	43709.6	21127	34022.9	17409.4	46007.7	26052.4	34855.3	34859.2	--	--	--	-	-	-	-
M362T34_1_NEG	--	34.173	362.235	104086	10836.6	24088.2	43996.1	54449.6	59846.1	59305.5	61970.9	61973.1	--	--	--	-	-	-	-
M477T26_NEG	--	26.137	477.265	12238.9	175358	88082.4	81878.2	75276	109291	100175	100173	98396.8	--	--	--	-	-	-	-
M663T35_NEG	--	34.602	663.46	18760.8	120812	121728	82084.3	54237.5	47235.1	48508.6	48395.8	45699.4	--	--	--	-	-	-	-
M380T82_NEG	--	82.027	380.064	4395.12	21157.2	33363.8	460924	200476	425980	293886	288112	293863	--	--	--	-	-	-	-
M563T24_2_NEG	--	24.289	563.302	13790.2	133342	86514.1	77802.9	57689.1	69509.9	84281.3	84282.1	83890.8	--	--	--	-	-	-	-
M563T28_2_NEG	--	27.551	563.266	4692.49	139852	19354.6	11652.4	24684.9	17229.1	21094.1	20706.6	19450.2	--	--	--	-	-	-	-
M155T48_NEG	--	47.713	154.983	47062.1	86442.6	367565	35457.4	31583.9	36102.9	60296.9	59094.6	60305	--	--	--	-	-	-	-
M735T134_NEG	--	134.354	734.51	199435	7351.94	15266.4	34296.7	44041.8	66921.8	44915.2	43884.1	45000	--	--	--	-	-	-	-
M433T36_NEG	--	36.1005	433.27	20788.8	34339.8	58799.6	39263	51238.4	65098.8	46891.8	50558.5	46763.4	--	--	--	-	-	-	-
M329T25_NEG	--	25.342	329.03	10502.3	7203.82	19374.2	150739	72638.7	189427	110106	114330	109690	--	--	--	-	-	-	-
M715T38_NEG	--	37.638	714.507	158392	8412.54	56241.7	85947.6	91046.4	102677	56146.6	55648.2	56146.6	--	--	--	-	-	-	-
M215T442_NEG	--	441.643	215.056	81404.7	7364.8	10003.5	61699	85351.5	84536.3	123619	120355	120354	--	--	--	-	-	-	-
M220T618_NEG	--	617.702	220.146	784377	766743	309872	531730	739075	760153	361957	534609	539589	--	--	--	-	-	-	-
M321T24_NEG	--	24.344	321.209	23504.3	158864	42040.5	73372.3	42497.3	30815.4	63394.6	63397.9	62473.8	--	--	--	-	-	-	-
M95T673_NEG	--	672.865	94.9803	188931	206382	454234	211729	262278	180166	169711	170308	181779	--	--	--	-	-	-	-
M204T31_NEG	--	30.811	204.03	25210.3	12919.5	30779.3	88719.1	82306.6	90522	73368	71287.2	71282.1	--	--	--	-	-	-	-
M309T41_NEG	--	41.078	309.027	6671.86	5914.55	5468.68	127195	59334	97257.2	58235.4	55998.9	55997.2	--	--	--	-	-	-	-
M627T25_NEG	--	25.0755	627.464	10407.2	84406.9	61042.1	116107	100750	66771.7	37175.8	37094.8	41591.4	--	--	--	-	-	-	-
M399T31_NEG	--	31.4715	399.145	5324.56	7841.23	193830	13905.4	11743.9	30800.2	34033.6	34034.6	29079.9	--	--	--	-	-	-	-
M528T450_NEG	--	449.898	528.191	97321.3	5235.13	22282.2	17832	53350.6	111110	60386.6	58991.6	58991.8	--	--	--	-	-	-	-
M789T138_NEG	--	137.603	788.523	283774	4765.03	27882.8	28125.3	51348.2	58855.9	80508.3	81397.9	80494.5	--	--	--	-	-	-	-
M257T53_NEG	--	52.701	257.211	43391.9	457148	319753	147731	25140.3	46139.4	104319	98743.6	98690.4	--	--	--	-	-	-	-
M132T109_NEG	--	109.33	132.048	173137	99529.3	166769	410759	915340	417459	243862	207173	213348	--	--	--	-	-	-	-
M504T183_NEG	--	183.492	504.307	110818	48054.4	256092	113082	171231	165989	177757	182551	177761	--	--	--	-	-	-	-
M350T38_NEG	--	37.5615	350.235	11366.7	731958	165665	47073.7	48142.3	44062.6	86366.8	83725	95145.6	--	--	--	-	-	-	-
M403T31_5_NEG	--	31.333	403.32	30685.9	34142.9	35616.2	139485	110157	79530	85796.7	85783.8	82101.4	--	--	--	-	-	-	-
M135T388_NEG	--	387.55	135.029	400083	28686.4	53325.9	36800.9	155911	60822.7	392161	387128	389671	--	--	--	-	-	-	-
M368T35_NEG	--	35.302	368.321	21214.4	170053	35073.1	8966.11	8494.39	11439.2	20238.8	20170.8	20239.5	--	--	--	-	-	-	-
M355T47_NEG	--	46.9955	355.284	3107.95	15939.8	50474.8	8541.2	4501.45	5774.69	32459.1	20384.1	21106.9	--	--	--	-	-	-	-
M305T33_1_NEG	--	32.783	305.032	11222.5	2388.54	12034.5	123543	85039	122401	93047.1	89274.7	89558.6	--	--	--	-	-	-	-
M429T33_2_NEG	--	33.19	429.193	46658.6	36256.7	90102.4	118388	121278	126922	127511	123510	123506	--	--	--	-	-	-	-
M501T26_NEG	--	25.612	501.287	27983.9	35074.7	43437.7	107687	118110	131102	107622	107611	106528	--	--	--	-	-	-	-
M328T22_1_NEG	--	22.06	328.021	10999.3	1226.12	7953.19	92328.4	59412.4	161724	81041.6	80165.7	80164.1	--	--	--	-	-	-	-
M464T193_NEG	--	192.661	464.312	42764.3	23910.5	49890.2	177562	226708	196780	129974	128418	129988	--	--	--	-	-	-	-
M730T34_NEG	--	33.683	729.618	31253.8	37073.3	45543.4	40991.9	38296.5	24133.7	54279.4	54278.5	54534.8	--	--	--	-	-	-	-
M103T105_NEG	--	104.657	103.003	339505	25955.8	42760.9	16579.7	49304.1	35760.9	229213	208293	218735	--	--	--	-	-	-	-
M699T38_NEG	--	37.9	698.51	107765	6816.92	65736.1	154399	155918	189392	43528.3	42141.3	44716.6	--	--	--	-	-	-	-
M111T491_NEG	--	491.107	111.009	755390	505989	337035	1.06338e+06	874586	1.11735e+06	508185	443234	442163	--	--	--	-	-	-	-
M419T51_2_NEG	--	50.592	419.314	184575	214705	397465	43949.5	27485.3	285993	146931	147404	89971.6	--	--	--	-	-	-	-
M563T33_3_NEG	--	32.933	563.362	41096.7	10961.3	18627	20825.9	14183.3	22774.6	23904.5	20551	23955.1	--	--	--	-	-	-	-
M347T25_2_NEG	--	24.643	347.224	26331.1	113896	55925.9	97642.1	89415.6	99200.6	105776	104539	104540	--	--	--	-	-	-	-
M347T34_NEG	--	33.99	347.151	5023.3	177582	13996.2	29751.3	44006.9	54036.3	37241	37288	29095.8	--	--	--	-	-	-	-
M479T34_2_NEG	--	33.75	479.407	36072.4	161502	136313	19395.1	11511.9	15978.7	99111.8	104470	99102.9	--	--	--	-	-	-	-
M745T38_1_NEG	--	37.863	744.55	95600.1	9533.95	25293.3	66964.3	71012.8	80520.8	43960.5	37972	43911.5	--	--	--	-	-	-	-
M120T65_NEG	--	64.5545	119.976	3.637e+06	38335.5	66184.6	68254.4	264365	113361	1.3107e+06	636019	1.31118e+06	--	--	--	-	-	-	-
M223T347_NEG	--	346.552	223.019	256941	251691	443181	641891	729737	805177	708343	708424	703010	--	--	--	-	-	-	-
M149T61_NEG	--	61.29	149.06	115854	214524	341668	302887	56888	391138	310550	310464	356048	--	--	--	-	-	-	-
M305T347_NEG	--	346.571	305.022	176850	154539	270196	537051	615216	715867	601405	601415	597807	--	--	--	-	-	-	-
M379T26_NEG	--	26.15	379.011	7061.64	6639.17	10690.6	182138	74745.4	12631.3	53664.7	52577.2	52130.7	--	--	--	-	-	-	-
M245T62_NEG	--	61.5305	244.978	22609.6	7393.05	1219.06	112509	370670	133711	122077	119217	119234	--	--	--	-	-	-	-
M504T25_1_NEG	--	24.814	503.713	83.5922	68472.1	130082	4130.94	2700.41	2282.95	26563.8	27533.9	28971.2	--	--	--	-	-	-	-
M233T27_NEG	--	27.024	233.011	29960.2	4205.14	10198.5	314388	166415	243284	157951	158992	158993	--	--	--	-	-	-	-
M435T84_NEG	--	83.9235	435.309	37693.9	142818	127771	274120	191031	191697	152216	150086	152316	--	--	--	-	-	-	-
M448T140_NEG	--	139.595	448.174	12266.2	284136	316265	277670	186117	110910	110929	109470	108671	--	--	--	-	-	-	-
M271T292_NEG	--	291.795	271.003	216875	163245	294243	297751	360710	357389	185519	185522	186910	--	--	--	-	-	-	-
M152T69_NEG	--	69.001	152.002	154583	268666	357320	465343	540079	470348	516474	506905	516504	--	--	--	-	-	-	-
M211T33_NEG	--	33.1145	210.991	6150.7	11359.6	44957	18707.9	21578.4	23962.4	18268.6	16180.7	18249	--	--	--	-	-	-	-
M133T430_NEG	--	429.998	133.014	897284	79909.6	89705.3	222483	219986	229004	301279	262252	300792	--	--	--	-	-	-	-
M581T182_NEG	--	181.603	581.364	87911.5	31279.3	131822	138577	210289	178762	163855	163651	162958	--	--	--	-	-	-	-
M451T48_NEG	--	48.169	451.089	369807	12284.6	87267.4	354983	178313	252980	185018	184960	196745	--	--	--	-	-	-	-
M219T32_NEG	--	31.9515	218.996	25046.8	10293.9	5334.27	55647.1	187881	149390	74798.6	76739.8	74814.9	--	--	--	-	-	-	-
M383T30_NEG	--	30.469	383.151	11275.6	67275	10591.2	11063.9	22035.7	20197	25379.2	27597.4	25354.3	--	--	--	-	-	-	-
M419T33_4_NEG	--	32.812	419.351	64514.6	43805.9	73804.3	128533	149364	101409	125605	125553	115186	--	--	--	-	-	-	-
M437T34_1_NEG	--	33.75	437.074	13382.4	3129.92	42591	226588	148109	169274	121872	120651	120636	--	--	--	-	-	-	-
M295T54_NEG	--	53.767	295.227	156462	237804	135247	312305	261517	208523	282778	281305	279158	--	--	--	-	-	-	-
M425T34_1_NEG	--	34.041	425.181	14674.2	7528.2	6979.45	6975.72	13866.9	9452.52	8407.63	10412.6	16211.5	--	--	--	-	-	-	-
M475T25_NEG	--	24.779	475.286	31040.8	74809.7	40878.7	122998	46538.3	68634.3	63528.7	58920.8	59105.4	--	--	--	-	-	-	-
M307T26_1_NEG	--	25.952	306.99	23619.1	6570.01	11641.9	110887	88086.5	96479.9	67744.5	68667.7	67038.7	--	--	--	-	-	-	-
M369T28_2_NEG	--	27.962	369.208	21878.5	95697.1	27679.8	16663.9	78227	14278.8	34288	34285.2	35041.2	--	--	--	-	-	-	-
M155T574_NEG	--	573.726	154.947	534229	934256	191311	1.05593e+06	1.5207e+06	235402	1.26344e+06	1.11771e+06	1.26398e+06	--	--	--	-	-	-	-
M758T35_1_NEG	--	35.005	757.504	95010.7	52638.5	50095.7	81804.9	92640.5	74332.6	50760.1	51043.7	53936	--	--	--	-	-	-	-
M215T25_NEG	--	25.467	215.001	28912.8	6894.76	27177.5	174451	88214.3	139034	100439	99700.5	99702.3	--	--	--	-	-	-	-
M229T174_NEG	--	173.623	229.086	13971	8860.7	19592.6	92142.7	96514.1	110805	85165.7	84792.8	85088.7	--	--	--	-	-	-	-
M738T24_NEG	--	24.3215	737.534	96548.2	18219.5	13600.2	8227.46	10919.6	7171.5	6881.25	7157.31	6884.2	--	--	--	-	-	-	-
M421T127_NEG	--	126.787	421.078	13046.3	20297.4	51513.8	533612	148104	186093	213953	213921	226182	--	--	--	-	-	-	-
M391T33_NEG	--	32.9585	391.178	19552.1	272922	32537.9	91428.4	72688.7	90978.3	70694.6	69183.7	71017.4	--	--	--	-	-	-	-
M427T30_3_NEG	--	30.16	427.213	98761.2	7769.64	17416.6	43976.1	49825.1	201879	33547.5	37942.8	37826.7	--	--	--	-	-	-	-
M95T689_NEG	--	688.506	94.9804	258497	325695	480950	295052	578042	213483	317565	316027	210627	--	--	--	-	-	-	-
M552T34_2_NEG	--	34.386	552.498	11226.9	16156.1	29801	55580	53442.7	19706.4	18109.3	18973.6	18971.8	--	--	--	-	-	-	-
M359T35_2_NEG	--	35.1965	359.279	82935.1	32202.4	82761.4	283905	232465	254342	158898	155449	158945	--	--	--	-	-	-	-
M377T54_NEG	--	54.059	377.268	37112	88248.3	274327	171910	68232.6	126526	128174	128175	126591	--	--	--	-	-	-	-
M503T29_NEG	--	29.1535	503.266	17477.6	127263	192659	49063.5	57523.9	48497.8	159123	157959	159150	--	--	--	-	-	-	-
M77T567_NEG	--	566.789	76.9701	171434	308017	214420	156697	297111	198260	198166	203919	203964	--	--	--	-	-	-	-
M519T99_NEG	--	99.007	519.237	2896.14	189938	278960	26080.9	22090	19327.4	50432.1	49077.5	50433.6	--	--	--	-	-	-	-
M407T31_1_NEG	--	31.159	407.043	3070.33	7991.05	10097	314259	226891	108459	63316.8	60666.3	63301.8	--	--	--	-	-	-	-
M596T35_2_NEG	--	34.903	596.478	2498.7	1406.64	12954.6	7807.78	4821.26	5324.47	13154.7	13152	12744	--	--	--	-	-	-	-
M816T35_NEG	--	35.18	816.497	61876.5	4320.87	12826.7	65215.7	37388.1	55119.1	34554	34241.1	34552.4	--	--	--	-	-	-	-
M319T26_1_NEG	--	26.109	319.011	3969.35	918.416	9419.18	41102.9	144711	198238	105010	102208	102218	--	--	--	-	-	-	-
M512T29_2_NEG	--	28.874	512.307	13342.2	86047.8	105331	55777.1	65762.2	56479.1	109703	97017.2	109701	--	--	--	-	-	-	-
M80T43_NEG	--	42.6435	79.9571	230727	28497.5	145557	149420	663158	212852	311477	290600	290745	--	--	--	-	-	-	-
M391T26_3_NEG	--	25.843	391.214	34813.9	37809.3	52002.9	30869.3	39670.2	34330.9	29704.7	26813.2	29928.9	--	--	--	-	-	-	-
M834T34_2_NEG	--	33.99	833.626	71921.1	7519.19	16279	33962.4	26742.3	13563.3	16312.6	16753.5	14989	--	--	--	-	-	-	-
M485T32_1_NEG	--	32.032	485.11	8472.68	5085.97	11789.8	125537	54415.8	109781	65276.1	63115.6	63211.4	--	--	--	-	-	-	-
M485T30_2_NEG	--	29.616	485.072	1364.65	4954.85	10497.9	37822.1	32819.6	19680.4	17199.1	14680	14860.9	--	--	--	-	-	-	-
M351T32_2_NEG	--	31.6545	351.288	17642.4	4110	17981.2	44610	110661	60576.2	26970.6	25396.4	25390.6	--	--	--	-	-	-	-
M537T147_NEG	--	146.837	537.34	19221.7	124491	215618	100689	72108.6	124862	50613.3	50512.7	33722.3	--	--	--	-	-	-	-
M99T421_NEG	--	421.097	98.9558	63968.8	16090.2	12465.1	112136	96716.3	99687.7	81026.6	81030.9	82058.8	--	--	--	-	-	-	-
M486T24_NEG	--	24.129	486.295	14033.8	36234.6	82223	103377	101279	113391	108950	108941	109996	--	--	--	-	-	-	-
M437T33_1_NEG	--	33.436	437.288	60505.5	61996.1	125549	48213.1	32738.2	106176	115666	113725	114944	--	--	--	-	-	-	-
M189T458_NEG	--	458.155	189.003	67605.9	11594.6	9523.56	8472.87	3384.12	17005.4	22135.5	23180.8	23184.2	--	--	--	-	-	-	-
M300T25_NEG	--	25.293	300.025	6232.46	1163.96	1665.9	163590	30000.6	83548.8	36829.9	36930.4	37341.8	--	--	--	-	-	-	-
M475T32_2_NEG	--	32.1125	475.34	27868.5	42675.5	170410	307479	151680	152822	154020	153998	145738	--	--	--	-	-	-	-
M341T34_NEG	--	34.4795	341.268	29437	32261.4	103048	94894.9	75316.5	84451	143740	143789	136458	--	--	--	-	-	-	-
M202T170_NEG	--	170.343	202.108	202073	2257.51	5952.5	5615.39	12491.9	9684.91	53908.9	53920.9	52895.1	--	--	--	-	-	-	-
M251T47_2_NEG	--	47.0405	251.2	92134.4	16884.4	17097.2	51291.1	86195.2	76523.6	72377.3	68274.5	68140	--	--	--	-	-	-	-
M809T188_NEG	--	188.314	808.511	175363	18893.3	15098.2	19873.7	14689.7	14167.9	18199.9	18225.4	15016.8	--	--	--	-	-	-	-
M329T165_NEG	--	165.435	329.112	12633.4	184613	265141	45614.2	38547.1	59390.9	76233.2	76268.3	74369.3	--	--	--	-	-	-	-
M752T84_2_NEG	--	84.42	751.587	17531	84573.8	54302.8	232832	133091	150737	69350.2	67674.5	67693.2	--	--	--	-	-	-	-
M329T347_NEG	--	347.262	328.983	221263	273811	340744	645038	660714	719344	661429	654196	654176	--	--	--	-	-	-	-
M408T32_NEG	--	31.861	408.317	11205.2	10900.2	63105.1	60385.1	124804	78358.7	42147.4	42136.4	40368.4	--	--	--	-	-	-	-
M359T169_2_NEG	--	169.384	359.076	2931.01	96614.4	246688	12572.8	14920.8	19524.4	17438.2	17442.5	17057.6	--	--	--	-	-	-	-
M359T169_3_NEG	--	169.084	359.123	2419.22	100421	248804	25825.9	23608	28845.4	43312.2	43236.5	42155.2	--	--	--	-	-	-	-
M289T54_NEG	--	54.174	288.532	8030.25	1370.43	11725.4	356216	111056	236219	173067	185381	172931	--	--	--	-	-	-	-
M367T30_NEG	--	29.831	367.084	11758.2	15788.3	6925.58	123231	116821	131042	77236.8	77250.2	79299.8	--	--	--	-	-	-	-
M517T26_NEG	--	25.546	517.351	41900.6	32194.8	23735	159733	134231	115121	102150	103626	103635	--	--	--	-	-	-	-
M639T63_NEG	--	62.761	639.233	7755.68	17835.2	26682.4	285939	142563	156290	124058	114550	124074	--	--	--	-	-	-	-
M554T29_1_NEG	--	29.313	554.249	611.326	39476.7	1747.68	3379.95	1912.47	2812.43	10340.9	17652.3	10483.7	--	--	--	-	-	-	-
M785T30_NEG	--	29.591	785.454	2653.2	7747.78	7165.68	33797.9	2887.14	34129.5	30853.3	30850.1	31095.7	--	--	--	-	-	-	-
M798T33_NEG	--	32.95	797.679	12760.3	25823.9	40061.9	46028.2	35911.4	23544.6	39818.5	41069.4	39837.5	--	--	--	-	-	-	-
M136T84_NEG	--	83.9735	136.007	911153	39783.7	81965.1	34625.3	52190.7	39824.5	421255	347818	421349	--	--	--	-	-	-	-
M310T37_NEG	--	37.305	310.282	76115.4	103051	71448.8	44684.3	42449.4	39715.3	83291	83297.1	82659.4	--	--	--	-	-	-	-
M463T75_NEG	--	74.6655	463.281	34921.6	67822.6	178610	52974.2	253007	125153	156545	140142	140218	--	--	--	-	-	-	-
M273T400_NEG	--	400.079	273.037	26802.4	5399.16	36498.3	48760.9	91710.4	91940.3	54776.9	55449.4	54772.4	--	--	--	-	-	-	-
M168T392_2_NEG	--	391.678	168.027	480232	83733.2	144829	107191	137592	183150	310348	310258	305647	--	--	--	-	-	-	-
M456T26_NEG	--	25.546	456.247	38819.2	5120.48	12562.3	19631.2	70127.9	33163.9	33182.2	41555.2	32309.1	--	--	--	-	-	-	-
M173T575_NEG	--	575.43	172.958	519207	918127	228281	1.20487e+06	765180	737561	1.11487e+06	996780	1.11937e+06	--	--	--	-	-	-	-
M610T468_NEG	--	467.774	610.111	59071.3	1572.6	3362.26	1865.82	1697.16	1024.36	11130.2	11444.9	11452	--	--	--	-	-	-	-
M407T233_NEG	--	233.383	407.278	28612.2	98012.1	235471	138092	134774	129716	137591	137660	139617	--	--	--	-	-	-	-
M432T142_NEG	--	142.415	432.276	8468.73	157918	193946	38724.2	25702.5	36904.6	46169.8	46173.2	46455.8	--	--	--	-	-	-	-
M221T175_NEG	--	175.267	221.023	162223	3177.34	5662.68	4943.64	6518.95	8384.83	19456.4	19772	19774.2	--	--	--	-	-	-	-
M61T483_NEG	--	482.869	60.9933	353222	330917	315065	392003	336409	350429	392840	382970	383029	--	--	--	-	-	-	-
M551T145_NEG	--	145.256	551.356	36386.4	102155	185285	177907	84476.1	78441.7	37018.8	36618.3	31487	--	--	--	-	-	-	-
M77T542_NEG	--	541.895	76.9701	348233	318203	216743	226375	295701	227306	218243	215621	218250	--	--	--	-	-	-	-
M241T29_2_NEG	--	28.85	241.053	41188.5	20453.3	43906.6	60387.9	61736.9	40479.4	49005.3	52191.1	52168.4	--	--	--	-	-	-	-
M646T33_1_NEG	--	33.008	645.559	29782.6	17650.4	20462.4	38109.3	26767.2	12758.3	22236.5	20372.2	20397.3	--	--	--	-	-	-	-
M341T36_2_NEG	--	35.698	341.303	11802.6	26276.3	37912.1	90845.5	19339.7	71779.5	63177.2	32114.3	33257	--	--	--	-	-	-	-
M257T29_NEG	--	28.85	257.081	17388.7	77368.6	61018.9	21328.5	23966.5	17608	47402.4	46179.6	46190	--	--	--	-	-	-	-
M347T25_1_NEG	--	24.952	347.187	4882.34	33756.7	120688	93461.3	10652.7	10897.9	25898.7	25219.1	25902.3	--	--	--	-	-	-	-
M417T31_2_NEG	--	30.692	417.193	41168.9	46412.4	90624.8	154490	141879	159232	137439	135085	137491	--	--	--	-	-	-	-
M227T30_NEG	--	29.621	227.037	45848.7	50884	36860.9	71862.8	83426.1	39311.6	54261.5	54417.4	59481.7	--	--	--	-	-	-	-
M457T32_3_NEG	--	32.224	457.224	138699	9008.76	58018	96217.6	95364.7	98303.5	127969	132010	131991	--	--	--	-	-	-	-
M788T34_1_NEG	--	33.513	787.545	83213.5	13988.6	20715.4	40542.8	36170.5	28708.3	26305.2	26475.8	22318.2	--	--	--	-	-	-	-
M200T159_NEG	--	158.593	200.055	375340	17830.7	39657	110077	134500	189268	252738	244893	252742	--	--	--	-	-	-	-
M771T136_NEG	--	136.475	770.568	247429	16524.4	59672	152879	153899	193620	131276	112202	132354	--	--	--	-	-	-	-
M515T32_2_NEG	--	32.2095	515.266	11872	17803.7	28135.2	23418.7	215757	37847.6	53414.4	54787.4	56219.8	--	--	--	-	-	-	-
M439T58_NEG	--	57.509	439.185	12254.1	14831.9	23916.4	258963	105792	206143	105698	104672	104667	--	--	--	-	-	-	-
M714T38_NEG	--	38.318	713.533	78355	17677.3	19778	42626.2	36527.8	41277.4	35043.5	28084.2	35081.2	--	--	--	-	-	-	-
M846T136_NEG	--	136.374	845.607	205267	17709.8	63707.8	143492	194615	192988	104613	104603	100972	--	--	--	-	-	-	-
M165T24_NEG	--	24.395	165.055	19223.7	682.666	29329.7	122284	47930.7	54981.6	45746.8	45737.6	45055.8	--	--	--	-	-	-	-
M693T133_NEG	--	132.743	692.521	16553.1	134253	229067	26248.1	22740.1	11137.2	13265.8	13266	13142.9	--	--	--	-	-	-	-
M692T138_NEG	--	137.687	692.463	17058.6	114936	186721	4425.8	5711.8	14324.2	9468.37	9461.7	9933.29	--	--	--	-	-	-	-
M694T37_NEG	--	36.883	694.475	35505.8	40712.9	44855.8	33026.7	37818.4	45033.1	43421.7	36791.9	44984.1	--	--	--	-	-	-	-
M151T270_NEG	--	269.83	151.025	362611	65366.8	165068	97319.3	92594.3	100985	186658	167977	186822	--	--	--	-	-	-	-
M712T142_2_NEG	--	141.773	712.491	130839	11666	20058.6	75852.6	105939	136282	73885.5	73912.8	76721.7	--	--	--	-	-	-	-
M379T29_NEG	--	28.85	379.213	60476.1	69415.5	78747.8	23065.2	24306.9	31577.9	49031.8	48858.7	38725.4	--	--	--	-	-	-	-
M658T37_NEG	--	37.0625	657.542	10710.7	80083.6	45590	56264.9	25403.5	29752.1	30615.7	31003.8	28061.7	--	--	--	-	-	-	-
M566T185_NEG	--	185.211	566.38	46073.6	31944.8	46532.8	102917	138549	121004	97926.7	97888.9	94216.9	--	--	--	-	-	-	-
M376T30_NEG	--	29.741	376.214	7408.17	82144.6	59659.3	37612	18122.8	23915	78626.5	78078.5	79363.7	--	--	--	-	-	-	-
M138T198_NEG	--	197.809	138.055	5896.84	156232	303191	10357.5	13944.3	13139	57348.8	57348.2	57921.6	--	--	--	-	-	-	-
M403T31_3_NEG	--	31.1665	403.213	6218.1	17704.5	13331.8	21918.6	23046.3	22177.7	29997.7	26728.2	26937.1	--	--	--	-	-	-	-
M323T34_NEG	--	34.313	323.293	23868.6	165588	46730	62259.7	22756.3	32555.7	41087.9	40863.1	21113.9	--	--	--	-	-	-	-
M530T166_2_NEG	--	166.041	530.3	213721	35534.1	156172	143693	257949	283959	446710	446635	454309	--	--	--	-	-	-	-
M289T119_NEG	--	119.244	289.038	4951.9	19031.3	35657	352199	222872	323599	236805	231906	231888	--	--	--	-	-	-	-
M337T154_NEG	--	153.72	337.121	83108.6	9118.54	29712	20991.7	11142.5	22861.4	30380	28261.4	28369.4	--	--	--	-	-	-	-
M457T60_NEG	--	60.314	457.329	43172.8	392674	651533	312516	268098	228556	363411	352935	336596	--	--	--	-	-	-	-
M343T31_NEG	--	30.538	343.283	22212.7	60563.1	146044	128112	114706	117473	142449	147589	142408	--	--	--	-	-	-	-
M364T32_3_NEG	--	32.45	364.149	133.248	494.569	14515.5	1319.54	2250.02	3951.67	5248.24	4810.99	9084.08	--	--	--	-	-	-	-
M415T30_3_NEG	--	29.8515	415.215	53283.5	12112	49914.3	35903	14372.8	38781.2	39583.1	39501.5	35287.9	--	--	--	-	-	-	-
M196T174_2_NEG	--	174.314	196.028	89690.9	1675.41	11403.9	4052.76	16703.5	12276.8	36380.8	39152.1	39711.5	--	--	--	-	-	-	-
M327T302_NEG	--	301.896	327.086	17808.6	73533.5	77097.9	93291.6	84491.7	109423	79265.9	78677.1	78904.2	--	--	--	-	-	-	-
M771T38_NEG	--	38.438	770.567	95539.4	7331.86	16986.5	50350.6	69510.4	57980.5	45698.8	45693.1	46488.6	--	--	--	-	-	-	-
M705T37_NEG	--	36.6525	704.524	27518.1	106785	34653	30279.4	33013.7	37468	25321.3	26322.5	27269	--	--	--	-	-	-	-
M248T136_NEG	--	136.346	248.113	1140.37	326600	444000	15665.1	132623	53844.2	156093	154418	156091	--	--	--	-	-	-	-
M303T29_2_NEG	--	29.119	303.198	83312.1	29344.8	24717.7	90829.5	93226.7	39240.1	66023.7	66022	66900.9	--	--	--	-	-	-	-
M367T34_2_NEG	--	34.163	367.32	68498.6	107408	132859	65810.7	55864	42770.5	62910.9	62208.6	62932.8	--	--	--	-	-	-	-
M363T173_NEG	--	172.841	363.052	20866.1	4360.58	27542.4	93326.3	82359.2	97020.2	46480.7	46483.8	47140.1	--	--	--	-	-	-	-
M413T26_NEG	--	26.341	413.234	40185.6	84654	126294	124971	115585	115772	107424	107339	107524	--	--	--	-	-	-	-
M422T28_NEG	--	27.86	422.09	11794.5	2947.23	9921.46	174009	51853.9	102933	58589.2	58493.4	58493.4	--	--	--	-	-	-	-
M365T208_NEG	--	207.783	365.016	1696.96	3488.18	9553.89	71202.7	59767.5	145714	58709.9	58704.6	57427.3	--	--	--	-	-	-	-
M153T46_NEG	--	45.503	152.986	20786.9	55225.3	93892.9	171624	249939	216091	192252	190531	190535	--	--	--	-	-	-	-
M412T34_NEG	--	34.453	412.277	5358.73	8778.8	2799.42	4107.24	16896.5	11957.4	9889.81	9754.07	9755.04	--	--	--	-	-	-	-
M271T105_NEG	--	104.947	271.226	19447.2	470308	559413	21742.4	57684.3	20673.4	86115.9	86281.8	97728.7	--	--	--	-	-	-	-
M623T25_NEG	--	25.324	623.36	11286.9	115971	57468.1	71082.8	65870.3	62861	76862.9	74190.8	74131.1	--	--	--	-	-	-	-
M662T34_NEG	--	34.163	661.553	24632.4	23628.2	98615.6	37892	36837	25263.8	58245.1	58243.3	58485.7	--	--	--	-	-	-	-
M301T295_NEG	--	294.759	301.2	20987.7	35461.4	53344	165116	127044	146935	99651.6	100769	99657.5	--	--	--	-	-	-	-
M476T46_NEG	--	45.529	476.275	79021.9	26312.5	42491.2	80738.4	93710.4	49897.3	83183.8	77883.3	77411.2	--	--	--	-	-	-	-
M259T452_NEG	--	451.565	259.045	230808	116.913	11248.9	6898.39	4325.93	9705.69	11900.6	11512	11900.6	--	--	--	-	-	-	-
M1187T164_2_NEG	--	163.919	1186.75	8854.94	112122	172352	16793.5	14755.9	17198	38903.4	38121.7	38117.4	--	--	--	-	-	-	-
M526T185_NEG	--	185.274	526.292	97879	14889.3	65767.6	16484.9	32305.9	28768.3	132496	132468	131138	--	--	--	-	-	-	-
M362T27_NEG	--	26.944	362.204	43526.9	12217.2	10088.6	26361.5	6406	6383.3	6429.09	5905.86	6426.65	--	--	--	-	-	-	-
M289T27_NEG	--	27.026	289.109	10883.6	20674.8	23933.9	57582.9	31221.4	96932.4	54878.9	54941.1	57105.4	--	--	--	-	-	-	-
M201T105_NEG	--	104.859	201.149	34634	331428	227083	80625	58470.2	125894	61621.9	62867.1	62834.8	--	--	--	-	-	-	-
M587T30_2_NEG	--	29.5655	587.359	41667.1	84005	16905.3	48319.2	48577.6	53715	47851	47842.4	46484.2	--	--	--	-	-	-	-
M537T37_2_NEG	--	36.904	537.486	20659.7	25298.9	4978.72	20459.3	13736.2	18893.4	23253.4	21782.2	21986.1	--	--	--	-	-	-	-
M96T34_2_NEG	--	33.7165	95.9519	130127	3874.96	26802.7	48728.9	123791	87779.8	86149.9	79771.8	84958.9	--	--	--	-	-	-	-
M331T29_3_NEG	--	29.022	331.12	31621.7	29985.9	53823.6	227241	224958	230746	163549	160255	163485	--	--	--	-	-	-	-
M315T170_2_NEG	--	169.761	315.049	46199.2	132874	26494.5	57941.4	41095.6	246475	43372.6	46603.4	42951.5	--	--	--	-	-	-	-
M255T28_1_NEG	--	28.321	255.068	38038.2	26796	34826.6	51534.2	53197.4	37923.3	49922.2	45320.8	54767.6	--	--	--	-	-	-	-
M473T35_2_NEG	--	34.573	473.359	22262.1	88698.1	120182	101934	86028.6	65202.1	93743.6	93725.9	91873	--	--	--	-	-	-	-
M342T141_NEG	--	141.104	342.267	27588.7	287742	503032	97301.9	140574	79841.5	83413.2	83392.9	85356.9	--	--	--	-	-	-	-
M527T32_4_NEG	--	31.6695	527.303	19366	52145.9	101580	88260.1	113899	76942.1	101905	100534	100547	--	--	--	-	-	-	-
M705T48_NEG	--	48.015	705.173	558.342	6248.04	11762.7	154111	146556	126007	59224.3	58473.8	40291.6	--	--	--	-	-	-	-
M252T26_NEG	--	25.9525	252.072	24468.8	16439.6	17056.6	28169.3	100048	44071.4	58703	62154.5	62168	--	--	--	-	-	-	-
M375T50_NEG	--	49.6745	375.229	53958.9	14509.7	24690.3	84428	123979	99025	54576.3	52440.1	54585.2	--	--	--	-	-	-	-
M375T34_NEG	--	33.5275	375.183	8039.18	38620.9	16138.7	33717.9	51494.7	33633.9	34825.7	31715.6	31640	--	--	--	-	-	-	-
M95T710_NEG	--	710.009	94.9803	258881	114148	188606	171166	201435	166072	153467	169714	153198	--	--	--	-	-	-	-
M889T184_NEG	--	184.162	888.562	107678	3465.49	14875.8	26843.9	17658.6	15749.2	12409.4	12412.4	12991.3	--	--	--	-	-	-	-
M643T31_3_NEG	--	30.573	643.48	13498.1	176943	274388	76817	50940.1	46940.7	64227.8	61963.2	64210.2	--	--	--	-	-	-	-
M140T186_NEG	--	185.67	139.984	267885	68746.5	142075	171612	185048	307106	272828	254888	273432	--	--	--	-	-	-	-
M61T501_NEG	--	501.31	60.9933	246936	147055	376920	421781	244953	264210	239589	239550	242012	--	--	--	-	-	-	-
M487T37_NEG	--	36.74	487.338	14146.8	44715.7	274315	81905.9	82517.7	64850.9	75228.6	73950.8	73967.3	--	--	--	-	-	-	-
M433T27_NEG	--	27.053	433.294	9678.03	53195.9	79968.7	54105.4	40008.3	25986.2	24508.8	26829.5	24586	--	--	--	-	-	-	-
M284T164_NEG	--	163.605	284.09	14564.9	98703.2	347320	17421.3	39684.2	30122.9	65773	65401.3	65399.6	--	--	--	-	-	-	-
M229T26_NEG	--	25.7475	229.017	22484.5	3618.25	11079.1	144744	55069.9	76714.8	74677.8	74199.5	74480.7	--	--	--	-	-	-	-
M411T347_NEG	--	346.571	410.985	116684	158389	289742	481110	503608	569816	494454	488094	488086	--	--	--	-	-	-	-
M531T48_2_NEG	--	47.5855	531.367	15765.5	53204.1	52103.3	88371.3	61896.8	57299	44576.2	44577.1	44220.8	--	--	--	-	-	-	-
M459T58_NEG	--	57.5045	459.345	21111.1	178235	434711	183702	134029	136414	134914	132225	132245	--	--	--	-	-	-	-
M459T33_3_NEG	--	32.783	459.272	6205.95	38767.8	142499	84154.7	28972.3	135201	107281	65745.6	107287	--	--	--	-	-	-	-
M806T147_NEG	--	146.575	805.558	15810	8325	17947.1	234347	153736	200646	96235.3	91697.7	91729.1	--	--	--	-	-	-	-
M753T135_NEG	--	134.587	752.553	241721	12712.6	28873.4	83012.5	86546.8	122682	43892	43350.7	43882.8	--	--	--	-	-	-	-
M271T278_NEG	--	278.396	270.974	27933.5	53624	15971.9	17859.8	75189	175789	62717	35020.1	29649.1	--	--	--	-	-	-	-
M236T164_NEG	--	163.924	236.092	129142	5910.06	12463.9	6081.82	7975.84	10724.9	48773.2	45318.1	46681.1	--	--	--	-	-	-	-
M247T476_NEG	--	476.083	247.045	44827.4	6208.44	8649.64	57025.1	65454	90804.6	85338.5	85868.2	86063.7	--	--	--	-	-	-	-
M396T290_NEG	--	289.851	396.004	163449	719.336	28499.2	16323	68520.9	40444.1	285607	281080	286213	--	--	--	-	-	-	-
M757T35_2_NEG	--	34.79	756.524	33927.6	6460.99	10429.3	50461.9	75350.8	60992.1	36654.8	34140.3	36713.6	--	--	--	-	-	-	-
M696T31_1_NEG	--	30.678	696.413	3756.53	87009	91958.5	20739	25946.6	19501.9	42452.6	38979.5	42513.8	--	--	--	-	-	-	-
M508T33_2_NEG	--	33.311	508.474	56503.8	1891.24	2420.22	9087.54	14542.6	16225.5	7363.17	8591.93	8601.88	--	--	--	-	-	-	-
M508T157_NEG	--	156.855	508.338	277245	128655	203531	197394	389066	376970	411947	412059	417209	--	--	--	-	-	-	-
M790T33_1_NEG	--	32.713	789.565	51447.7	8131.28	72042.8	35639.9	25106.2	21398.1	21807.5	21780.6	18661	--	--	--	-	-	-	-
M407T27_2_NEG	--	27.044	407.245	14706.9	63965.5	59031.8	46100.2	29239.6	48792.5	45971.1	46007.4	50201.6	--	--	--	-	-	-	-
M255T294_NEG	--	294.101	255.053	6855.38	12405.1	21513.6	102401	77927.5	78876.4	44829.9	45666.9	45666.5	--	--	--	-	-	-	-
M812T34_NEG	--	34.308	811.542	51118.7	2615.79	20071.6	24563.9	12326.8	9939.89	17551.2	20215.8	17675	--	--	--	-	-	-	-
M241T295_NEG	--	295.426	241.122	12312.8	56198.6	52675.8	73446.8	60819.7	71874.4	53290.7	54091.3	54089.4	--	--	--	-	-	-	-
M579T143_NEG	--	143.176	579.388	21692.4	85148.4	61771.2	159320	44642.8	41723.5	19021.5	18211.2	19038	--	--	--	-	-	-	-
M518T32_2_NEG	--	32.024	518.388	16437	151476	94034.1	21410.1	18795.8	37956.8	84308.2	84913.8	85038.2	--	--	--	-	-	-	-
M655T39_NEG	--	38.785	655.228	1295.32	1499.27	10408.5	67555.4	42396.2	45495.1	48172.8	46364.3	48129.8	--	--	--	-	-	-	-
M193T110_NEG	--	110.323	193.086	37771.5	36210.8	45535.2	210026	148896	171476	106918	92875.5	92593.4	--	--	--	-	-	-	-
M493T165_NEG	--	164.683	493.172	2451.65	18911.5	11344.4	105609	63812.1	242842	79645.8	77796.2	79623	--	--	--	-	-	-	-
M397T111_NEG	--	110.809	397.33	36281.8	344306	294322	91717	76084.3	70219.4	96702.1	98633	96685.6	--	--	--	-	-	-	-
M496T27_3_NEG	--	26.604	496.278	22813.7	134627	72240.6	68226.3	66109.8	56420.2	117973	115062	115059	--	--	--	-	-	-	-
M438T192_NEG	--	192.48	438.261	10674.7	172386	205833	104035	91197.7	76778	77845.4	76983	76999.6	--	--	--	-	-	-	-
M438T193_NEG	--	193.181	438.295	23209.9	168648	202720	49547.9	58771.6	50627.5	37109.9	37079	36257.1	--	--	--	-	-	-	-
M182T24_NEG	--	23.624	181.992	5285.21	3417.34	7538.18	17646.2	40700.9	30972.4	38412.1	25047.1	39037.8	--	--	--	-	-	-	-
M237T172_1_NEG	--	172.385	236.96	1380.82	2043.01	3792.96	27187.8	6981.6	41357.5	18676.1	18676.1	18538.5	--	--	--	-	-	-	-
M341T165_NEG	--	164.88	341.081	39800	82020.8	222689	40712.7	15792.6	25118.1	34538.8	34502.8	33020.3	--	--	--	-	-	-	-
M395T35_3_NEG	--	34.874	395.35	74814.5	95282.7	75851	23390.1	15798	26486.5	46475	47311.9	47298.4	--	--	--	-	-	-	-
M439T27_NEG	--	26.61	439.249	32027.2	52738.5	95001.5	71343.3	71726.7	50131.5	65092	67139.1	65082.9	--	--	--	-	-	-	-
M607T29_2_NEG	--	28.54	607.449	21575.4	172806	175637	71547	41877.9	20973.6	50873.6	65791.3	65603.3	--	--	--	-	-	-	-
M467T123_NEG	--	123.285	467.156	11496.6	37907.5	52018.6	347414	120430	230555	388598	388063	349297	--	--	--	-	-	-	-
M309T173_NEG	--	173.32	309.052	6165.12	6161.87	12362.8	55044.1	70352.9	74162.2	59580.4	59184.3	59720.2	--	--	--	-	-	-	-
M679T35_2_NEG	--	35.3495	679.455	12589.3	27031.8	89264.3	56628.6	52938.8	51414.4	43759.6	41259.4	43742.6	--	--	--	-	-	-	-
M380T34_2_NEG	--	33.542	380.323	56543.8	89221.1	72164.8	30336.6	24812.4	20650.5	41869	42626.4	42697.6	--	--	--	-	-	-	-
M457T31_NEG	--	30.8775	457.187	3511.51	8189.71	9593.28	47644.9	49356.6	46292.5	33635.3	33647.5	30391.3	--	--	--	-	-	-	-
M221T712_NEG	--	711.597	221.15	72890.9	52735.1	62863.6	70661.7	89291	72336.3	69454.2	73414	73141.2	--	--	--	-	-	-	-
M1063T38_NEG	--	37.9	1062.81	76339	731.946	8552.26	12156.2	30916.2	31292.6	37908.7	37510	37516.6	--	--	--	-	-	-	-
M417T54_NEG	--	54.048	417.335	10967.3	209133	184612	77214.2	52409.5	57814.6	67838.7	67840.4	66643.4	--	--	--	-	-	-	-
M528T180_NEG	--	180.058	528.306	86910.2	17507.4	88880	28495.2	32256.9	34359.9	92614.6	89914.2	89906.2	--	--	--	-	-	-	-
M565T107_NEG	--	107.143	565.282	39480	276576	400833	96398.1	85214.6	99462.4	138563	134494	134298	--	--	--	-	-	-	-
M744T133_2_NEG	--	133.226	744.496	105286	6391.42	9315.97	18371.8	19643.9	48242.2	50025.9	49502.5	49492.6	--	--	--	-	-	-	-
M283T339_2_NEG	--	339.02	283.112	183486	4503.71	11592.6	8780.24	30526.8	47965.5	36066.9	35716.1	35717.2	--	--	--	-	-	-	-
M308T37_NEG	--	37.382	308.266	51700	54012.9	54330	24991.4	38475.1	39884.4	62807	60015.6	59997	--	--	--	-	-	-	-
M775T49_NEG	--	49.0905	774.536	188380	27024	34442.6	65764.2	68131.1	76367.8	31098.9	31160.5	31028.6	--	--	--	-	-	-	-
M242T30_NEG	--	30.334	242.012	113680	6536.49	5434.33	97869.4	97990.2	100448	76923.2	75328.5	75285	--	--	--	-	-	-	-
M225T48_2_NEG	--	48.349	225.185	45236.8	29820.3	25400.7	61460.7	64424	145990	54192.1	54198.4	53441	--	--	--	-	-	-	-
M675T29_1_NEG	--	28.936	675.163	455.174	3011.41	5046.07	68856	68654.9	94141.1	35505.2	35464.3	40437.1	--	--	--	-	-	-	-
M474T34_2_NEG	--	33.51	474.362	43007.5	47628.1	60874.7	36939.9	47514.4	29587.6	43378.8	45087.5	43378.4	--	--	--	-	-	-	-
M359T151_NEG	--	150.612	359.188	70991.2	754547	1.06739e+06	583673	317610	477548	387354	387795	328783	--	--	--	-	-	-	-
M186T257_NEG	--	257.466	186.045	273472	954.664	5110.88	77939.1	108481	114936	255493	286136	254735	--	--	--	-	-	-	-
M345T347_NEG	--	347.348	345.014	144186	176786	295407	481760	502036	568541	495940	495924	493632	--	--	--	-	-	-	-
M423T27_NEG	--	26.79	423.108	26867.7	10651.4	17646.2	133810	93372.8	68779.5	71177.4	69263.6	71177.6	--	--	--	-	-	-	-
M465T25_1_NEG	--	24.5395	464.845	5870.13	117072	29804.9	5878.34	5839.62	4694.93	13636.9	14728	14721.8	--	--	--	-	-	-	-
M513T32_NEG	--	32.4445	513.105	6441.36	4093.33	14479.9	69810.1	103310	91797.8	54504.9	52702.5	52683.3	--	--	--	-	-	-	-
M706T35_NEG	--	35.315	705.503	28229.2	47858.7	136892	75084.3	31766.8	14699.1	41632.5	41634.6	39987.9	--	--	--	-	-	-	-
M233T24_NEG	--	23.613	232.975	31463.9	3158.69	14850.9	27625.9	117011	47409.1	32508.9	31329	32511	--	--	--	-	-	-	-
M351T48_2_NEG	--	48.327	351.289	12388.2	107744	86430.1	18832	14797.3	25190.1	23941.6	23026.3	23949.5	--	--	--	-	-	-	-
M217T277_NEG	--	276.897	217.002	248621	316281	296458	320815	291531	245386	694261	671129	694253	--	--	--	-	-	-	-
M563T33_1_NEG	--	32.783	562.518	33784.3	6796.05	2881.44	4038.08	6182.71	4175.79	7992.5	7739.48	7745.73	--	--	--	-	-	-	-
M640T30_NEG	--	30.452	640.46	7963.36	54730.3	73590.3	73970.2	50717.2	53814.6	32878	32152.6	32185.1	--	--	--	-	-	-	-
M213T31_NEG	--	31.4285	213.022	47325.2	13743.5	25329.5	57306.7	47315.2	40853.7	40717	40724.4	38006.2	--	--	--	-	-	-	-
M213T28_1_NEG	--	28.389	212.986	1744.77	8440.63	21811.7	5963.23	10375.5	7612.54	4730.33	4717.62	5189.12	--	--	--	-	-	-	-
M453T74_NEG	--	74.151	453.178	9280.35	13926.5	23942.1	173745	72675.4	106697	238639	214899	214943	--	--	--	-	-	-	-
M587T35_NEG	--	34.602	587.499	14450.5	123674	15551.5	27476.8	18190.2	16251.8	16776.1	15551.2	15626.4	--	--	--	-	-	-	-
M532T31_2_NEG	--	31.454	532.402	10421.1	98179.3	67725.8	11021.4	6951.52	8897.64	51850.2	50120.2	50118.6	--	--	--	-	-	-	-
M534T34_NEG	--	33.9015	534.348	39669.3	63550.5	108339	17940.1	17067.2	14754.1	11111.3	12538.1	11089.3	--	--	--	-	-	-	-
M454T295_NEG	--	294.761	454.115	24699.5	22136.8	45104.9	41963.4	49748.7	60103.9	63334.9	64146.8	63340.1	--	--	--	-	-	-	-
M478T25_NEG	--	24.83	478.305	37094.9	104911	76554.1	98022.7	63599	57640.2	55578.5	55568.4	51892.5	--	--	--	-	-	-	-
M195T578_NEG	--	578.344	194.905	212868	272910	188884	185485	229758	193283	296293	278030	295663	--	--	--	-	-	-	-
M377T36_NEG	--	35.983	377.086	3266.02	9582.69	14541.3	37291.9	26698.9	105587	30383.9	30438.6	21453.6	--	--	--	-	-	-	-
M587T32_3_NEG	--	31.861	587.324	11596.5	122095	25318.3	32949.9	50763	24898.4	38592.6	38647.9	33934.5	--	--	--	-	-	-	-
M241T167_NEG	--	166.649	241.143	40253.6	131373	119379	135403	118880	143206	119199	116867	116886	--	--	--	-	-	-	-
M282T264_NEG	--	264.213	282.154	65854	580.21	600.756	1177.53	3644.39	3568.9	6661.42	6660.69	6530.86	--	--	--	-	-	-	-
M552T186_NEG	--	185.552	552.329	60496	15679.1	67531.9	52149.4	86270.7	77825.7	95136.3	91246.8	91219.6	--	--	--	-	-	-	-
M325T52_2_NEG	--	52.083	325.273	15148	161958	113801	47239.3	33973.4	42012.1	49866.1	50970.9	49868.3	--	--	--	-	-	-	-
M313T22_NEG	--	21.793	312.997	4969.89	3145.1	3437.98	52005.9	25771.7	85862.7	45344.1	46367.7	46365.7	--	--	--	-	-	-	-
M634T31_3_NEG	--	30.583	634.48	18842.8	230142	324944	74926.6	58100.4	20471.5	40324.8	39555.9	40623.2	--	--	--	-	-	-	-
M421T155_NEG	--	155.145	421.161	3934.18	15807.2	11891.3	130018	62523	86677.2	74375.8	76929.4	77084.3	--	--	--	-	-	-	-
M396T32_3_NEG	--	31.659	396.279	17491.4	44722.3	14298.5	18057.7	27082.6	22879.6	18057.3	17984.4	15952.5	--	--	--	-	-	-	-
M335T32_3_NEG	--	32.45	335.329	63504.1	25737.3	28621.6	3951.68	9591.44	5596.76	4004.33	2812.35	1909.37	--	--	--	-	-	-	-
M182T284_NEG	--	283.712	182.031	109876	28213.2	32937.6	31653.1	21537.9	19216.9	23366.7	24248.2	24253.3	--	--	--	-	-	-	-
M241T196_NEG	--	195.719	241.143	48891.9	232842	272186	211250	198543	224720	264699	240389	240341	--	--	--	-	-	-	-
M99T348_NEG	--	347.959	99.0063	450079	411447	360942	803804	703770	837221	759432	761418	776032	--	--	--	-	-	-	-
M313T47_NEG	--	46.7005	313.107	11908.4	39198.3	37439.1	96740.9	97617.9	70515.6	54357.9	53278.4	52979.6	--	--	--	-	-	-	-
M313T34_1_NEG	--	33.602	313.107	18724.4	23159.7	31778	84559.4	91140.1	92729.5	71364.4	71313.9	69197.3	--	--	--	-	-	-	-
M396T48_NEG	--	47.708	396.317	6363.22	66477.8	179633	13250.7	11710.4	13433.4	22851.8	22488	22490.6	--	--	--	-	-	-	-
M449T87_NEG	--	86.592	449.264	31984.9	29113.2	61611.6	28957.6	23591	21955.7	25525.1	25393.4	27423.7	--	--	--	-	-	-	-
M449T88_NEG	--	87.5035	449.3	42358.8	52779.8	149753	31952.7	324624	107267	127126	111498	127295	--	--	--	-	-	-	-
M555T29_2_NEG	--	28.85	555.332	16039.7	68183.2	176503	98837.1	85931.2	113009	125880	125881	130379	--	--	--	-	-	-	-
M221T26_2_NEG	--	25.745	221.017	8123.64	9578.11	12786	51783.4	20311.6	21715.5	22415.9	22603	19538.9	--	--	--	-	-	-	-
M704T33_2_NEG	--	32.761	704.417	3821.93	78980.2	16037.8	15097.4	15201.8	16140.7	17406.8	17459.9	15888.1	--	--	--	-	-	-	-
M61T575_NEG	--	575.187	60.9932	573702	803514	294974	851486	474044	1.14071e+06	266090	398219	532680	--	--	--	-	-	-	-
M557T25_2_NEG	--	25.48	557.385	10385.6	7833.18	7026.76	85349.1	106342	65470.6	50848.9	43725.3	47182.8	--	--	--	-	-	-	-
M411T28_NEG	--	27.681	411.073	10767	11972.5	26406	169974	126278	165503	88549.7	86032.7	88536.2	--	--	--	-	-	-	-
M319T30_2_NEG	--	30.4605	319.084	40839.5	22168.5	54244.6	151309	113087	144766	106656	106655	106259	--	--	--	-	-	-	-
M61T530_NEG	--	530.166	60.9933	199439	442417	236897	214547	39806.1	177502	175346	186818	185911	--	--	--	-	-	-	-
M206T108_NEG	--	108.364	205.976	228081	7232.7	7316.26	1024.24	5822.96	5370.6	7734.6	7731.04	8182.27	--	--	--	-	-	-	-
M240T47_3_NEG	--	47.023	240.467	10250.4	117071	87196	3826.24	4589.59	5505.79	55522.7	51438.8	55401.5	--	--	--	-	-	-	-
M374T247_NEG	--	247.294	374.304	584.864	183477	194659	4402.94	6795.77	4508.67	45540.4	43990.3	43986.6	--	--	--	-	-	-	-
M281T139_NEG	--	139.34	281.247	60427.3	30265.4	37175.8	64213	25647.2	34820.3	104339	54904.8	68250.7	--	--	--	-	-	-	-
M754T38_1_NEG	--	37.7375	753.561	44022.8	5251.77	4679.78	16688.9	16528.5	13690.1	15238.7	16131.6	22393.1	--	--	--	-	-	-	-
M736T36_NEG	--	36.46	735.514	59339.6	40613.1	72405.5	49193.9	44014	33203.3	28104.9	24349.3	24352.5	--	--	--	-	-	-	-
M436T152_NEG	--	152.271	436.28	233101	50883.3	140524	379521	266157	268750	464188	464536	431981	--	--	--	-	-	-	-
M534T30_NEG	--	30.334	534.295	43826.2	50281.6	69041.2	75986.4	74485.7	67894.9	87004.4	86393.5	87010.8	--	--	--	-	-	-	-
M441T32_NEG	--	32.032	441.356	35689.8	27414.5	37385.4	95630.4	80193.3	58242.1	45323.3	47354.9	45370.5	--	--	--	-	-	-	-
M351T25_NEG	--	25.4465	351.016	5393.65	6151.29	9527.56	121678	15160.7	29163.8	26008.2	25394.7	25955.8	--	--	--	-	-	-	-
M815T138_NEG	--	137.805	814.558	176404	9897.81	31639.8	60858.7	85958.6	101067	106446	105280	105282	--	--	--	-	-	-	-
M171T100_NEG	--	100.207	171.102	80364.4	171858	317130	205123	91674.3	421284	178140	164682	162351	--	--	--	-	-	-	-
M221T685_NEG	--	685.112	221.15	40962.1	70186.1	52388	74208.7	67638.4	124283	82950.5	67287.3	64689.8	--	--	--	-	-	-	-
M408T109_NEG	--	108.756	408.317	1301.97	112312	248334	8653.99	9564.5	8378.93	19658.2	20529.9	20531.1	--	--	--	-	-	-	-
M469T55_NEG	--	54.602	469.33	22487.6	305874	332552	161739	172870	118673	153546	153546	152345	--	--	--	-	-	-	-
M229T288_NEG	--	288.182	229.144	29032.4	46869	65489.3	179428	143026	175409	118472	117652	117646	--	--	--	-	-	-	-
M421T25_1_NEG	--	24.814	421.224	13579.3	26330.2	14914.2	45068.4	44929.6	25993.8	47449.2	50542	50582.1	--	--	--	-	-	-	-
M453T30_NEG	--	30.091	453.084	27801.5	9496.56	13084.1	115941	101535	104599	71522.6	71827.9	71137.4	--	--	--	-	-	-	-
M305T33_2_NEG	--	32.9585	305.068	18997.3	53730.6	17976.3	84904.2	52862.2	62764.7	64551.6	62566.5	62604.1	--	--	--	-	-	-	-
M197T25_NEG	--	25.293	197.045	15108.8	20033.6	34264.5	131776	41959.9	66399.2	50986.6	43279	50932.4	--	--	--	-	-	-	-
M746T76_NEG	--	75.623	745.501	315625	95609.1	134745	158100	151853	147522	82934.3	86278.2	82902.6	--	--	--	-	-	-	-
M179T34_2_NEG	--	33.542	179.035	19586.8	19209.1	24015.4	66085.7	66629.6	70612.6	67047.1	67045.2	66041.5	--	--	--	-	-	-	-
M405T33_4_NEG	--	32.739	405.335	53933.1	32904.5	34627.8	81919.6	67779.4	55607.7	64006	65132.1	63755	--	--	--	-	-	-	-
M391T24_NEG	--	23.816	391.285	10597.7	15268.7	14361.3	29211.5	27187.1	27642.3	31775.3	26715.8	24672.8	--	--	--	-	-	-	-
M165T268_NEG	--	267.801	165.033	94359.5	2151.81	14948.4	121519	94752.9	99845.6	298209	382195	382134	--	--	--	-	-	-	-
M83T22_NEG	--	22.0505	82.9536	1165.27	414.851	178.514	1936.68	4530.62	5563.97	7380.72	7379.64	7252.56	--	--	--	-	-	-	-
M451T151_NEG	--	150.565	451.303	78513.5	86080.3	235526	229889	437203	371510	229217	322134	322979	--	--	--	-	-	-	-
M626T31_2_NEG	--	30.9645	626.444	10247.4	26103.3	50491	10447	8540.61	9796.53	27387.6	20660.9	19879.3	--	--	--	-	-	-	-
M402T29_2_NEG	--	29.0945	402.162	8006.88	2910.01	47439.2	14514.2	23009.4	26907	78125	75994.3	76040.8	--	--	--	-	-	-	-
M639T128_NEG	--	127.808	639.493	16869.2	172592	188552	124456	74883.3	53004.1	29883.9	28856.9	29845.1	--	--	--	-	-	-	-
M345T95_NEG	--	95.346	345.096	279679	132298	138260	227952	140107	139333	227730	209669	228427	--	--	--	-	-	-	-
M302T166_NEG	--	166.233	302.065	116250	29867	50071.9	90174.8	88504.3	122235	126103	123838	123830	--	--	--	-	-	-	-
M163T83_NEG	--	82.78	163.018	632123	29586.4	63306.7	12024.2	39527.9	56436.2	312632	243598	313085	--	--	--	-	-	-	-
M206T88_NEG	--	87.766	206.012	291428	30097.4	217311	50342.5	39565.5	77358.8	88475.5	88512	81442.3	--	--	--	-	-	-	-
M227T108_NEG	--	108.137	227.128	4350.74	19161.2	18918.6	15175.4	12122.1	48002.3	26946.8	35935	25883.1	--	--	--	-	-	-	-
M795T134_NEG	--	134.347	794.563	228601	10140	20965.8	48435.4	47529.9	83340.5	67764	68154	68154.6	--	--	--	-	-	-	-
M870T133_NEG	--	133.292	869.607	167196	11443.9	21283.3	21098.8	34332	45628.5	59980.1	58624.1	58633.2	--	--	--	-	-	-	-
M418T34_NEG	--	34.3615	418.299	64258.6	13754.2	18306.7	18779.2	55822.7	15231.9	21115.8	19757.1	19666.8	--	--	--	-	-	-	-
M353T28_1_NEG	--	28.403	353.032	7232.26	14208.1	57442	64480.7	59869.8	49769.1	44152	40415.1	40376.5	--	--	--	-	-	-	-
M513T30_2_NEG	--	30.179	513.287	25810.2	58086	140984	160674	116791	85038.4	110840	106505	106295	--	--	--	-	-	-	-
M814T34_1_NEG	--	33.794	813.673	20326.1	44511.2	58671.1	40205.9	38827.7	24529.3	46685.4	50738.6	46641.4	--	--	--	-	-	-	-
M217T224_NEG	--	224.298	216.98	2704.93	959.659	3782.91	60900.6	38318.6	36356.4	30885.5	30175.7	30207.8	--	--	--	-	-	-	-
M289T23_1_NEG	--	23.487	289.001	1808.35	3801.05	3515.75	30990.4	25892.6	52804.7	21473.2	21288.1	21383	--	--	--	-	-	-	-
M817T57_NEG	--	57.431	816.574	361830	7317.9	26910.8	44736	93712.8	115065	82950.5	82741.5	82679	--	--	--	-	-	-	-
M239T48_NEG	--	48.169	239.201	37083.2	95466.1	71793.3	76152.4	61598.1	78092	86078.5	82318.4	82217.8	--	--	--	-	-	-	-
M323T392_2_NEG	--	392.217	323.078	233451	1245.87	6303.52	1637.79	11773.9	13606.4	87272	87982.1	87980.7	--	--	--	-	-	-	-
M599T25_NEG	--	24.952	599.433	5318.24	21530	32892.6	84961.9	75577.5	66563.1	43368.3	45668.1	45708.6	--	--	--	-	-	-	-
M671T29_NEG	--	29.0135	670.507	10681.9	97909.4	71534.5	36685.2	23235.9	18654.2	14415.5	14615.6	12763.3	--	--	--	-	-	-	-
M404T386_NEG	--	385.73	404.103	11644.3	32296.1	76451.4	319821	351714	243996	168136	168088	171296	--	--	--	-	-	-	-
M547T103_NEG	--	102.795	547.234	3176.98	96605.1	309782	21426.4	19776.8	14484.8	50838.5	50371.9	53674	--	--	--	-	-	-	-
M481T138_NEG	--	138.405	481.29	9289.32	74030.3	188254	140273	107114	118461	83460.6	81786.6	81817.2	--	--	--	-	-	-	-
M275T26_NEG	--	25.7475	274.986	15976.4	5940.91	5736.73	116428	157433	87622.9	143022	142266	142265	--	--	--	-	-	-	-
M613T34_3_NEG	--	34.2355	613.41	12629.2	5629.03	15338.3	9685.27	6472	7089.66	16724.8	16158.3	19501.1	--	--	--	-	-	-	-
M387T91_NEG	--	90.75	387.252	27703	113718	176834	221899	148788	144692	95012.2	87722.6	88048.5	--	--	--	-	-	-	-
M648T35_2_NEG	--	34.5405	648.458	7580.26	203119	130837	29530.9	39771	23645.3	69852.1	69292.4	69827.5	--	--	--	-	-	-	-
M257T73_NEG	--	72.939	257.211	28099.4	394581	283706	60927.5	45092.3	68781.9	93948.2	93927.7	96545.9	--	--	--	-	-	-	-
M386T29_NEG	--	28.85	386.202	584.681	26535.6	27322.9	29110.3	27670.3	31893.4	7559.12	8627.81	12515.6	--	--	--	-	-	-	-
M363T33_4_NEG	--	32.812	363.288	29982.5	21488.1	40814.3	91873.6	117839	69496.9	76398.2	74118.5	74147.8	--	--	--	-	-	-	-
M785T186_1_NEG	--	185.562	784.511	245198	4233.11	9744.19	11165.2	17247.6	8653.41	16252.7	15963.7	16416.7	--	--	--	-	-	-	-
M337T586_NEG	--	585.882	336.897	272686	277915	70333	336889	316038	335609	285325	285313	281465	--	--	--	-	-	-	-
M494T168_NEG	--	168.155	494.356	26647.3	75028.9	28687.9	36120.3	23294.9	27209.5	26294.4	25822.5	24937.2	--	--	--	-	-	-	-
M341T114_NEG	--	113.736	341.268	19531.9	341897	494732	96894.9	111218	147745	233281	233921	203055	--	--	--	-	-	-	-
M395T167_NEG	--	166.743	394.969	2418.08	2318.3	5121.77	108370	41027.5	114150	60693	60694.1	59416.4	--	--	--	-	-	-	-
M425T32_1_NEG	--	31.68	425.052	2394.68	9812.28	15192.5	60169.8	55160.3	34026.3	26756.1	29055.5	26144.8	--	--	--	-	-	-	-
M663T75_NEG	--	75.359	663.459	17735.6	196023	335753	49199.8	23278.2	27959.4	21530.6	21532.2	22109.1	--	--	--	-	-	-	-
M719T35_NEG	--	35.1965	719.484	86028.5	26580.8	63373.4	55489.9	61647.9	59360.8	43282.1	47761.7	43445.9	--	--	--	-	-	-	-
M493T74_NEG	--	74.3675	493.172	7085.1	20319.7	24867.6	158664	182992	193292	127114	112083	109692	--	--	--	-	-	-	-
M476T166_NEG	--	166.196	476.276	117757	41142.3	166696	123064	278375	209919	333155	333019	352044	--	--	--	-	-	-	-
M558T26_2_NEG	--	26.134	558.417	8684.22	109599	103093	14873.9	23708.7	24811.6	43715.9	43719	42050.5	--	--	--	-	-	-	-
M671T31_4_NEG	--	31.182	671.466	30665.3	47642	36849.2	22460.8	20590.7	27944.4	22884.1	24807.5	22675.5	--	--	--	-	-	-	-
M376T35_NEG	--	35.315	376.148	3075.97	77493.2	60264.2	20852.5	13308	4308.99	13117.6	12957.2	12299.9	--	--	--	-	-	-	-
M429T32_NEG	--	32.058	429.011	1828.41	20851.8	1772.07	109815	29345	24096.4	7949.34	8543.78	7962.97	--	--	--	-	-	-	-
M722T79_NEG	--	78.945	721.501	111528	339537	294372	322204	187320	127666	50763.3	50394.4	50762.3	--	--	--	-	-	-	-
M259T38_NEG	--	37.682	259.241	64449.7	7469.44	6519.55	12492.6	21366.4	13584.9	21820	21822.9	21308.8	--	--	--	-	-	-	-
M226T27_NEG	--	26.704	226.018	120127	2269.59	8272.88	10329.9	48464.8	18868.7	12156.9	10839.6	12179.1	--	--	--	-	-	-	-
M1186T164_NEG	--	163.988	1186.25	917.39	82134.4	126367	12361.9	11506.5	12000.1	26229.8	25972.1	25966.8	--	--	--	-	-	-	-
M239T36_NEG	--	35.9515	239.201	23446.5	22923.1	28434	37581.1	32884.7	49748.8	35249.8	34021	33996.8	--	--	--	-	-	-	-
M417T53_NEG	--	53.449	417.239	90789.1	24807.7	31716.1	115523	143564	113617	83238.3	82060.7	82998.7	--	--	--	-	-	-	-
M417T31_1_NEG	--	31.224	417.157	13011.8	4751.39	22179.1	53081.6	53351.7	65599.4	37295.5	32065.4	37591.9	--	--	--	-	-	-	-
M325T35_3_NEG	--	34.544	325.272	23676.8	56517.1	80901.1	48362.7	37145.8	44627.5	55785.7	55793.2	55157.2	--	--	--	-	-	-	-
M770T136_NEG	--	136.411	769.555	133316	23601.4	30228	74151.3	72268.7	101056	62735.8	62845.8	61160.8	--	--	--	-	-	-	-
M509T35_2_NEG	--	34.9675	509.385	22701.2	32317.9	10912.8	9303.39	9229.34	7979.26	12260.4	10134	12035.2	--	--	--	-	-	-	-
M283T45_NEG	--	44.652	283.084	11466.5	12246.4	106070	23617.4	47390.9	33705.2	23684.5	19716.3	23585.1	--	--	--	-	-	-	-
M569T28_2_NEG	--	27.86	569.348	6736.22	46470.5	54569.4	45403.4	50764.2	43025.9	45668.4	47247.4	45668.3	--	--	--	-	-	-	-
M526T190_NEG	--	190.262	526.348	4336.43	8813.39	7586.71	12738.8	15657.9	13363	10895.6	10692.2	10680.2	--	--	--	-	-	-	-
M124T383_NEG	--	383.175	124.006	18219.8	4408.46	6448.29	3243.53	5752.47	5594.3	12983.2	12179.4	12187.8	--	--	--	-	-	-	-
M662T145_NEG	--	144.575	662.475	15242.6	58827	83335	125386	76752.4	73092.6	26226.6	23909.4	23906.4	--	--	--	-	-	-	-
M411T29_2_NEG	--	29.133	411.144	1603.95	9875.91	3007.75	8183.06	9384.09	11753.7	15840.3	16759.2	22747.9	--	--	--	-	-	-	-
M186T25_2_NEG	--	24.643	186.427	84875.8	418.119	1269.25	30905.5	18249.7	27456.5	24391.9	24394.3	26530.2	--	--	--	-	-	-	-
M256T250_NEG	--	249.854	256.058	178856	261474	233073	201075	345729	254279	196392	187249	187197	--	--	--	-	-	-	-
M410T33_2_NEG	--	32.984	410.235	52106	17372.6	18103.9	9274.17	10905.7	13482.9	24497.2	23005.8	24495.3	--	--	--	-	-	-	-
M171T36_NEG	--	36.433	171.138	42760.9	24411.6	45982.4	71496.9	28398.5	83069.2	45541.2	46643.3	46622	--	--	--	-	-	-	-
M950T34_4_NEG	--	33.513	949.798	5976.7	10833.5	67735.4	3165.07	3764.27	2168.93	28477.7	28476.6	28123.1	--	--	--	-	-	-	-
M467T65_NEG	--	65.038	467.157	7397.66	12258.9	25463.5	457632	106311	342093	108165	110477	144981	--	--	--	-	-	-	-
M443T28_2_NEG	--	28.2125	443.027	2677.17	1408.08	6948.57	160725	85089.5	77256.4	69074.1	68563.5	68575.7	--	--	--	-	-	-	-
M360T31_2_NEG	--	30.578	360.183	7541.71	63700.3	166368	25403.7	24511.5	23038.2	66892.7	65615.6	66898	--	--	--	-	-	-	-
M161T367_NEG	--	366.647	161.045	80240.9	8841.62	16081.3	30955.4	27383.5	30232.4	47659.5	47259.6	47265.3	--	--	--	-	-	-	-
M400T24_NEG	--	24.162	399.731	85.0702	70393.9	47352.8	8535.76	5298.37	4784.04	4654.6	4652.49	4575.89	--	--	--	-	-	-	-
M675T25_NEG	--	24.82	675.463	15468.2	12961	22796.7	18569	8555.49	22536	22143.5	21964.4	23331.2	--	--	--	-	-	-	-
M437T77_NEG	--	77.475	437.265	26703.4	54128.8	124163	39811.7	183600	100386	111928	111858	113610	--	--	--	-	-	-	-
M61T331_NEG	--	330.598	60.9931	585339	586982	626913	636597	573655	504104	657792	633294	658021	--	--	--	-	-	-	-
M345T34_NEG	--	34.163	345.171	4073.94	3970.14	20202.2	9508.93	12560	8778.87	9023.67	9788.37	9757.59	--	--	--	-	-	-	-
M470T26_NEG	--	26.4645	470.299	23736.9	4976.98	188394	66952.1	74233.8	65360.3	52094.3	49725.8	52092.6	--	--	--	-	-	-	-
M664T136_NEG	--	136.182	664.488	3346.82	73235.8	143361	15641.5	11405.1	13787.8	15487.5	16065.2	15485.8	--	--	--	-	-	-	-
M231T24_2_NEG	--	24.129	231.032	67990	8987.83	12828.6	151016	118469	123455	81434.6	83332.9	83346.4	--	--	--	-	-	-	-
M239T34_NEG	--	33.6125	239.128	20549.6	13952	20152	13104.5	13366.9	13503.9	19475.5	22402.1	19254.3	--	--	--	-	-	-	-
M201T238_NEG	--	238.355	201.025	329572	498387	439472	285285	153327	171809	812120	812407	750099	--	--	--	-	-	-	-
M438T25_NEG	--	25.48	438.272	25516	17268.3	14931.1	16611.1	13863.5	12583.5	17342.2	18381.2	17178.4	--	--	--	-	-	-	-
M398T25_NEG	--	25.366	398.009	16278.6	814.679	1367.36	124937	22155.9	69039.4	26318.7	26692.4	26314.9	--	--	--	-	-	-	-
M527T32_3_NEG	--	31.522	527.267	10894.6	138968	78791.3	67234.4	42626.1	79634.7	74391	74208.7	77877.8	--	--	--	-	-	-	-
M396T35_NEG	--	34.859	396.353	26467.8	115115	24052.5	6878.13	4439.53	7941.8	15302.6	15027.5	15303.1	--	--	--	-	-	-	-
M440T33_NEG	--	33.032	440.307	3830.92	60872.8	68300.5	9868.57	19814.3	15872.6	44774.6	43334.8	44768.8	--	--	--	-	-	-	-
M457T43_NEG	--	42.853	457.364	4504.76	101101	104020	29708.7	29428.4	20114.4	54021.5	54248.8	52030.2	--	--	--	-	-	-	-
M433T53_NEG	--	53.477	433.33	23804.9	149789	127694	95224.2	67163.1	74658.1	67583.4	67590.1	67012.1	--	--	--	-	-	-	-
M654T36_NEG	--	35.6755	653.509	11675	48707	124673	49314.6	38485.9	31555.5	27945.4	27170.4	27906	--	--	--	-	-	-	-
M363T162_1_NEG	--	161.603	363.116	17395.4	28123.7	34095.6	24172.3	8190.09	22752.6	24555.9	24360.9	29007.8	--	--	--	-	-	-	-
M127T27_NEG	--	26.7915	126.904	37309.9	9356.76	4179.7	25477.7	34237.9	32162	25321.9	26705.9	25441.6	--	--	--	-	-	-	-
M383T36_NEG	--	35.698	383.315	15578.2	24774	95519.5	42560.6	37257.5	38838.7	45979.5	44709	44699.3	--	--	--	-	-	-	-
M327T31_NEG	--	30.5975	327.162	68698.5	44909.2	42646.6	78073.6	61786.7	54954.5	59532.9	55421.3	62631.6	--	--	--	-	-	-	-
M799T33_1_NEG	--	33.334	798.683	11889.3	21958.2	21061.7	31201.7	27318.5	14427.1	24896.8	23866.6	23868.3	--	--	--	-	-	-	-
M281T93_NEG	--	93.2365	281.041	21218.9	45113.2	59328.6	332068	150418	145647	128328	140407	128698	--	--	--	-	-	-	-
M601T157_NEG	--	156.904	601.408	15596.1	35092.6	28995.6	178255	70620.9	85674.3	44046.4	42089.6	44060.7	--	--	--	-	-	-	-
M374T30_NEG	--	29.799	374.199	20633.8	35436.4	103198	25675.4	23367.8	23626.5	37864	37709.2	40285.7	--	--	--	-	-	-	-
M723T60_NEG	--	59.959	722.511	386327	73440.7	53373.9	72840	80938.5	104356	43586.9	43606.1	45879.6	--	--	--	-	-	-	-
M279T31_NEG	--	31.454	279.016	7465.48	1642.34	7074.07	49495.2	97748	62001.7	49792.8	49680.4	46813.8	--	--	--	-	-	-	-
M405T174_NEG	--	173.624	405.262	28947.9	161489	283858	248018	215664	226080	218951	214065	208975	--	--	--	-	-	-	-
M451T25_2_NEG	--	25.004	451.285	35253.4	28413.6	31320.3	49861	66873.4	50619.9	41948.6	42017	39241.7	--	--	--	-	-	-	-
M399T219_NEG	--	219.12	399.32	11066.2	89761.1	103504	3812.3	5672.13	3724.24	23835.9	23332.6	23336.5	--	--	--	-	-	-	-
M145T231_NEG	--	231.438	145.05	20988.1	43004.4	80697.5	53846.7	101992	106316	62797.3	62183.6	62190.7	--	--	--	-	-	-	-
M389T31_1_NEG	--	31.403	389.161	16806.3	125431	151687	90216.9	69941.4	77551	90325.6	87743.1	90226	--	--	--	-	-	-	-
M529T26_NEG	--	25.8365	529.317	31386.1	33135.9	52070.4	177745	81221.4	127003	92027.4	86369.5	86180.6	--	--	--	-	-	-	-
M535T36_2_NEG	--	35.905	535.471	42070.3	7073.91	9842.21	14032.3	14617.5	4227.45	13727.4	12716.1	12778.9	--	--	--	-	-	-	-
M259T449_NEG	--	448.873	259.021	228023	6603.71	11798.9	6380.87	6708.61	12047.4	49212.5	49485.1	49484.8	--	--	--	-	-	-	-
M201T24_NEG	--	24.154	201.022	71657.9	3545.04	3153.19	17456.4	18077.8	28834.8	25893	26257.1	26257.7	--	--	--	-	-	-	-
M201T25_NEG	--	24.643	200.985	1423.03	3254.25	4975.55	7647.76	9506.57	7392.8	8739.77	6411.22	6136.47	--	--	--	-	-	-	-
M387T347_NEG	--	346.783	387.024	83032.1	86510.2	177018	294468	328766	381887	297471	301773	298807	--	--	--	-	-	-	-
M783T37_NEG	--	36.589	782.534	39822.1	21311.3	22286.9	34245.6	27448.9	25896.6	25237.5	24403	24401.6	--	--	--	-	-	-	-
M685T34_3_NEG	--	33.513	685.479	28450.3	67276.4	25380.4	17443.1	22580.9	16355.8	19909.5	19849.2	12886.5	--	--	--	-	-	-	-
M710T172_NEG	--	171.824	709.502	75824	6226.62	4029.02	11334.4	16065.8	20920.5	19880.4	19284.8	19373.9	--	--	--	-	-	-	-
M395T35_1_NEG	--	35.0015	395.208	5640.72	1882.65	9527.14	7916.96	6909.07	4155.97	11840.5	9196.19	9424.7	--	--	--	-	-	-	-
M283T36_NEG	--	36.483	283.134	10879.8	7687.46	5829.23	58190.4	40508.7	9598.35	22844.9	22843.9	22981.6	--	--	--	-	-	-	-
M519T24_2_NEG	--	24.0715	519.403	34769.1	51853.6	6176.68	7395.06	1816.41	5419.43	59704.7	59068.5	59073.4	--	--	--	-	-	-	-
M197T454_NEG	--	454.175	196.976	35118.4	1198.01	1150.54	7337.24	7675.5	11046.5	24712.2	24700.7	24171.1	--	--	--	-	-	-	-
M660T36_NEG	--	36.112	659.56	6184.66	9395.15	13731.7	35524.6	17732.3	14450.7	14310.8	13962.3	14271.9	--	--	--	-	-	-	-
M271T25_2_NEG	--	25.48	271.024	7285.03	989.953	6099.58	121287	36231	84933.6	38389.4	38376	33248.3	--	--	--	-	-	-	-
M455T33_1_NEG	--	32.784	455.1	7983.01	17600.3	29507	152273	104359	125064	86237.4	80456.7	86248.7	--	--	--	-	-	-	-
M217T421_NEG	--	420.704	216.909	43422.9	15984.6	15544.5	72117.8	64730.1	74172.8	49928.6	49407.3	49728.3	--	--	--	-	-	-	-
M489T34_NEG	--	34.342	489.355	13257.6	94517.5	37166.1	40738.1	35239.1	37996.3	38854.6	38827.3	41003.1	--	--	--	-	-	-	-
M95T15_NEG	--	14.5065	94.9803	398558	194565	313463	261802	252196	223079	214776	209356	237218	--	--	--	-	-	-	-
M356T36_NEG	--	35.703	356.285	2908.06	67027.2	22562.5	12166.6	11212.6	13560	11984.7	9880.57	12103.3	--	--	--	-	-	-	-
M364T35_NEG	--	35.1815	364.328	41556.7	60570	97975.9	17229	18673.3	18204	46010.8	44255.9	44269.6	--	--	--	-	-	-	-
M681T32_2_NEG	--	31.586	681.402	3055.43	16984.1	43170.1	69582.2	53498	50374.2	36723	35248.3	35388.4	--	--	--	-	-	-	-
M567T31_4_NEG	--	31.076	567.46	4892.38	14915.1	9490.5	38331.7	25565.8	21768	7676.6	6804.36	7691.39	--	--	--	-	-	-	-
M754T35_1_NEG	--	34.615	753.506	44218.9	23880.9	9408.71	34211.1	52732.8	36875.9	38014.6	35541.9	37927.5	--	--	--	-	-	-	-
M746T49_NEG	--	49.079	745.501	113904	35177.6	31272.3	63988.2	64293.4	73064.5	41778.7	36714.4	36763	--	--	--	-	-	-	-
M447T34_NEG	--	33.7515	447.345	24654.7	55688.4	93729.9	85325.3	76033	102534	131604	131602	129505	--	--	--	-	-	-	-
M515T49_NEG	--	49.122	515.121	6361.29	28377.9	75996.1	214841	186627	207057	145293	122995	145309	--	--	--	-	-	-	-
M708T136_NEG	--	136.446	708.495	111526	19517.1	30949.8	39408.2	32837.1	54409.3	35375.1	34497	34519.7	--	--	--	-	-	-	-
M365T53_NEG	--	53.3445	365.267	40652.3	103297	82208.1	56832.4	68162.5	39851.4	64990.9	59709.7	59522.7	--	--	--	-	-	-	-
M255T39_NEG	--	39.002	254.981	58040.2	10649.1	5006.06	51308.2	26710.2	33598.9	39943.9	39934.7	41648.3	--	--	--	-	-	-	-
M566T444_NEG	--	444.34	566.156	3829.69	11599.5	18296.5	136540	212880	131411	71615.8	70182.4	71601.5	--	--	--	-	-	-	-
M539T33_1_NEG	--	32.933	538.516	34932.1	5706.84	22287.2	32643.2	21790.5	10818.7	6631.68	6909.72	6629.46	--	--	--	-	-	-	-
M538T35_NEG	--	34.628	538.485	44885.3	22421.1	16068.5	29658.3	26230.9	17780.6	14284.6	14351.3	12312.8	--	--	--	-	-	-	-
M337T53_NEG	--	52.7025	337.237	19237.1	49036.9	53547.9	54905.5	41848.8	35682.5	34949.2	30609.5	29716.2	--	--	--	-	-	-	-
M323T27_NEG	--	26.999	323.167	50252.9	38980.3	35122.2	61241.4	63918	19604.9	56042.4	56671.2	56670.4	--	--	--	-	-	-	-
M293T60_NEG	--	59.959	293.174	78010.8	97784.8	58223.1	42062.1	154087	54832.8	85410.8	85368.7	80498.8	--	--	--	-	-	-	-
M341T49_2_NEG	--	48.9265	341.268	22570.7	61179.7	165878	63200	51331.9	60361.6	54490.7	54497.7	52273.6	--	--	--	-	-	-	-
M387T31_NEG	--	30.692	387.182	15878.6	48764.5	87195.5	50946.6	49856.1	44893.9	46217.6	47701.3	48067.6	--	--	--	-	-	-	-
M239T424_NEG	--	423.656	238.891	64853.2	52269.2	53131.8	67133.1	66471.8	61963.7	56224.4	55766.7	56225.3	--	--	--	-	-	-	-
M766T72_NEG	--	72.0495	766.479	303651	27822.9	21799.9	9807.23	8008.73	11345	34107.8	33605	34109.2	--	--	--	-	-	-	-
M437T86_NEG	--	85.959	437.11	1867.26	11724.5	19016	407641	72013.4	190902	131435	146830	132973	--	--	--	-	-	-	-
M453T102_NEG	--	101.808	453.393	28348	137857	44021.1	10079.1	16361	15413.4	21214.5	20872.2	20861	--	--	--	-	-	-	-
M506T159_NEG	--	158.912	506.322	115092	63763.9	158352	143503	242678	243556	309509	309950	313148	--	--	--	-	-	-	-
M676T36_3_NEG	--	35.821	676.488	10227.8	69340.1	64392	40884.3	34964.2	26984.5	35160.7	32878.4	35131.6	--	--	--	-	-	-	-
M450T171_2_NEG	--	171.004	450.328	1174.11	38278.1	41630.6	86239.4	72882.1	75355.8	115770	90256.6	115326	--	--	--	-	-	-	-
M389T64_NEG	--	63.572	389.268	25983.8	43972	78902.8	166026	127001	148537	227779	227204	236887	--	--	--	-	-	-	-
M322T296_NEG	--	296.013	322.113	15184.6	101089	44920.9	13316.1	14326.8	6895.19	17689	18253.4	17694.3	--	--	--	-	-	-	-
M255T297_2_NEG	--	297.436	255.122	6606.29	13719	3809.43	3643.83	3089.21	3544	1566.79	1972.83	1961.2	--	--	--	-	-	-	-
M639T36_NEG	--	35.703	639.492	4414.82	50741.5	30401.7	25876.1	21979.5	15271.7	16390.5	15968.4	15940.1	--	--	--	-	-	-	-
M670T32_2_NEG	--	31.902	670.409	7629.43	43505.9	74568.6	45292.2	17158.9	21142.8	17978.3	16364.8	15714.2	--	--	--	-	-	-	-
M433T32_3_NEG	--	32.3895	433.188	27247.6	43612.7	76858.4	128278	133659	134723	120776	114715	120564	--	--	--	-	-	-	-
M433T103_NEG	--	103.269	433.33	16977.1	292307	113481	206889	160750	183241	109379	118814	108833	--	--	--	-	-	-	-
M347T162_NEG	--	161.863	347.122	7633.24	167381	160207	33545.6	73156	56002.3	61922.6	61911	63133.2	--	--	--	-	-	-	-
M347T165_NEG	--	164.685	347.073	12058	250873	240329	8780.77	109667	9023.13	63574.7	24077	63406.8	--	--	--	-	-	-	-
M115T408_NEG	--	408.161	115.003	365280	13294.2	17022	61944.7	91632.8	100391	134387	152004	151935	--	--	--	-	-	-	-
M600T31_3_NEG	--	31.213	600.428	10888.4	37730.3	128615	46508.2	65737.5	30955	50551.1	50529.3	47398.6	--	--	--	-	-	-	-
M865T38_1_NEG	--	37.9115	864.572	63282.3	5772.12	11360.8	16439.7	20694.5	21511	29916.4	30091.9	29470.3	--	--	--	-	-	-	-
M1054T97_NEG	--	97.436	1053.5	6169.28	66675.8	133088	4054.92	3284.44	3086.58	15033.7	14757.8	14755.8	--	--	--	-	-	-	-
M585T160_NEG	--	159.643	585.377	10339.2	24746.6	33063.4	96943.9	43298.3	39180.9	21876.7	21877.1	22037.8	--	--	--	-	-	-	-
M128T41_NEG	--	41.076	127.947	60994.7	47356.8	65904.5	28740.4	67849.2	59032.3	87430.4	84690.3	84680.4	--	--	--	-	-	-	-
M405T152_NEG	--	152.476	405.262	42553.8	112695	150942	261551	272483	373585	243623	243782	223645	--	--	--	-	-	-	-
M388T32_3_NEG	--	31.5565	388.328	2772.76	3775.93	2175.35	2384.3	13376.1	2543.12	8603.66	5507.66	5194.71	--	--	--	-	-	-	-
M173T525_NEG	--	525.273	173.008	76481.3	46251.9	61778.2	36957.5	62069.7	102240	195170	196352	96417.7	--	--	--	-	-	-	-
M380T31_1_NEG	--	30.8135	380.079	8142.46	6038.79	5888.01	30646.8	89219.9	82720.3	25019.1	22299.5	20064.5	--	--	--	-	-	-	-
M118T54_NEG	--	53.572	117.928	89492.5	96441.7	85773.2	105327	83426.7	84564.1	516972	353770	520438	--	--	--	-	-	-	-
M487T147_NEG	--	147.121	487.271	18242.4	40931.3	74071.2	104530	107855	166965	108991	119215	106492	--	--	--	-	-	-	-
M448T181_NEG	--	180.641	448.28	15148.3	23463.6	54080.1	87635.9	121835	103347	62652.1	62656	63635.2	--	--	--	-	-	-	-
M487T160_NEG	--	160.365	487.303	26234.2	186442	27913.9	62721.7	27006.3	30990	44679.7	43520.2	44679.3	--	--	--	-	-	-	-
M531T148_NEG	--	147.791	531.269	153086	14434.3	28146	17313.2	31698	38105.6	56376.5	56303.3	50709.4	--	--	--	-	-	-	-
M428T434_NEG	--	433.816	428.024	63772.1	2014.59	4572.03	1061.13	5316.17	7024.88	28303.4	28245.9	28302.1	--	--	--	-	-	-	-
M399T35_NEG	--	34.853	399.339	20992.6	23836.5	60176.5	21663	17572.4	16010.3	25422.2	25505.2	30595.1	--	--	--	-	-	-	-
M191T424_NEG	--	423.784	191.019	34717.9	19035.6	24914.9	11242.4	13044.3	15706.9	31340.9	47824.3	29934.2	--	--	--	-	-	-	-
M531T28_2_NEG	--	28.353	531.297	46441.6	9284.42	126126	49605.3	58849.2	39333	40831.4	41552.8	40856.5	--	--	--	-	-	-	-
M531T30_2_NEG	--	30.003	531.262	27431	29415.2	30261.1	28648.9	19467.5	21428.7	27018.1	21181.9	23002.2	--	--	--	-	-	-	-
M263T347_NEG	--	347.252	263.011	137361	142876	245773	363486	388020	434054	404808	404819	402552	--	--	--	-	-	-	-
M321T23_NEG	--	22.7575	321.126	9926.62	15603.2	47581.5	36190.3	27023.6	24969.4	30006.8	29993.4	30274.5	--	--	--	-	-	-	-
M790T137_1_NEG	--	136.892	789.526	130169	12856.1	38888.2	18046.9	11125.8	31802.7	41329.1	38851.5	38836.1	--	--	--	-	-	-	-
M574T26_NEG	--	25.671	573.628	8302.07	40960.7	46491.4	18403.3	12416.7	13985.6	14407.6	12371.2	12737.7	--	--	--	-	-	-	-
M324T34_3_NEG	--	34.173	324.296	30541	19977.9	4805.13	6119.91	4142.55	5576.01	10298.4	9656.42	10301.5	--	--	--	-	-	-	-
M839T34_NEG	--	34.173	839.49	46591.6	9090.22	20439.6	19087.9	23920	19876	19485.6	18903.6	21240.2	--	--	--	-	-	-	-
M436T34_2_NEG	--	34.453	436.249	9531.51	71966.1	69500.5	13031.4	13802.2	16670.6	83527	83538.3	85867	--	--	--	-	-	-	-
M472T33_2_NEG	--	32.936	472.17	160461	9527.54	90816.2	14808.1	16060	19552.5	70913.9	41783	68834.5	--	--	--	-	-	-	-
M472T32_2_NEG	--	31.522	472.205	93585.1	18559.1	7777.63	10732.8	7765.35	8473.6	65505.3	65444.1	26558.8	--	--	--	-	-	-	-
M407T34_2_NEG	--	34.3615	407.207	15941.1	19526.1	28555.4	7800.19	5775.88	7091.82	19397.4	14941.9	14816.2	--	--	--	-	-	-	-
M118T108_NEG	--	108.308	117.928	328123	204720	243414	125047	227880	133423	743609	751823	749214	--	--	--	-	-	-	-
M870T38_NEG	--	37.9715	869.606	61646.2	2614.65	11685.3	15012.8	19173.6	13558.2	18363.9	17538.3	18356.5	--	--	--	-	-	-	-
M712T37_NEG	--	37.153	712.492	123277	3579.63	55295.3	94118.6	18410.1	80479.6	66565.8	61695.3	68660.3	--	--	--	-	-	-	-
M718T36_2_NEG	--	35.6755	718.477	58561.4	40929.9	27294.1	23208.5	30251.4	22048	29106.2	29060	31881.5	--	--	--	-	-	-	-
M439T83_NEG	--	82.615	439.053	19346.5	13995.4	19563.2	342287	28028.1	64025.1	53219.9	49180.8	48847.3	--	--	--	-	-	-	-
M738T152_NEG	--	152.296	737.536	185059	7965.63	10379.5	15043.5	22675.8	39126.6	26936.5	26984.8	27932	--	--	--	-	-	-	-
M307T26_2_NEG	--	25.745	307.156	2482.8	71698.8	36739.5	12231.8	10280.3	12286	8916.69	9814.99	8867.23	--	--	--	-	-	-	-
M396T34_1_NEG	--	34.1395	396.317	6464.84	15524.3	63392.6	14991.3	17503.6	14671.4	22501.2	22155.2	22148.6	--	--	--	-	-	-	-
M456T232_NEG	--	232.163	456.342	4617.88	81689.2	63818.6	1687.63	1863.9	1656.81	15489.4	15482.1	15638.1	--	--	--	-	-	-	-
M694T81_NEG	--	81.35	694.474	27490.9	258646	297559	104514	71606.2	51928.2	35773.4	35783.6	34346.1	--	--	--	-	-	-	-
M352T33_2_NEG	--	32.933	352.291	6507.1	43529.1	30182.7	13599.7	50227.3	25249.5	23071.2	23197.7	19646.8	--	--	--	-	-	-	-
M625T27_NEG	--	27.2245	625.374	4528.94	54557	18244.4	32057.2	26453.7	30559.4	28489.5	35207.8	34808.7	--	--	--	-	-	-	-
M449T152_NEG	--	151.871	449.242	30319.6	43306	47812.5	172400	126871	161707	101169	100950	102152	--	--	--	-	-	-	-
M340T28_NEG	--	28.321	340.165	37663.7	41786.8	29355.5	54169.6	34216.6	29370.2	39960.5	39640.1	41018.7	--	--	--	-	-	-	-
M296T77_NEG	--	76.93	296.029	14272.1	4494.57	5533.37	251765	119754	190212	128417	129130	109822	--	--	--	-	-	-	-
M171T33_NEG	--	32.8035	170.977	978.193	12767.4	18196.5	8242.58	17007.6	53556.8	10618.9	10529.1	9455.38	--	--	--	-	-	-	-
M787T34_NEG	--	34.031	786.536	111293	10034.6	22638.6	18110.8	25824.2	20202.7	27305.7	27234.3	27279.3	--	--	--	-	-	-	-
M350T21_NEG	--	21.326	349.641	621.706	48268	43921.8	4147.03	4815.88	3486.01	7288.2	7285.58	7974.28	--	--	--	-	-	-	-
M381T30_NEG	--	29.799	381.1	5349.43	22310.5	6531.26	87736.3	88954	78938	55490.9	55493.8	53694.2	--	--	--	-	-	-	-
M449T140_2_NEG	--	140.416	449.325	14682.6	122139	128815	294983	204030	152139	151912	141227	143665	--	--	--	-	-	-	-
M333T33_1_NEG	--	32.5815	333.136	38824.8	67406	75264.8	64331.6	51202.6	104524	115087	109173	115155	--	--	--	-	-	-	-
M599T34_3_NEG	--	33.513	599.497	25220.2	5587.26	15432.9	28173.3	30389.9	33340.2	14443	14482.6	15228.5	--	--	--	-	-	-	-
M209T46_NEG	--	45.618	209.045	67314.5	61511.9	131837	115090	208999	203830	187471	199315	199316	--	--	--	-	-	-	-
M660T172_NEG	--	171.566	659.511	108579	7118.27	12872	7405.39	14952.4	23242.1	13298.3	15610.9	14416.1	--	--	--	-	-	-	-
M413T34_2_NEG	--	34.053	413.326	11573.8	13268.8	60642.6	63664.5	60112.5	59768.8	57709.1	58475.7	57713.1	--	--	--	-	-	-	-
M411T53_NEG	--	52.77	411.06	6897.05	4646.27	49262.6	86524.9	81330.9	58533.6	66891.6	65679.9	69712.9	--	--	--	-	-	-	-
M639T31_3_NEG	--	31.403	639.355	5293.34	20717.6	45279.1	70743	40414.1	41592.2	33549.3	33554.3	34543.9	--	--	--	-	-	-	-
M339T53_NEG	--	53.0105	339.105	25699.9	152811	156062	164052	163110	176499	279099	271963	272066	--	--	--	-	-	-	-
M870T181_NEG	--	180.769	869.552	49010.5	7750.82	15379.1	8078.97	8929.44	11759	12152.2	11551.3	11544.6	--	--	--	-	-	-	-
M377T152_NEG	--	151.639	377.268	56927	134603	78485.5	491863	200461	398225	217193	253405	215236	--	--	--	-	-	-	-
M189T105_NEG	--	104.935	189.076	241342	302935	472706	469645	331674	585812	357778	329314	321895	--	--	--	-	-	-	-
M136T99_NEG	--	98.838	136.04	5332.75	20713.3	19978.1	27290	12757.9	15939.1	20990.5	15984.7	34434.9	--	--	--	-	-	-	-
M237T424_NEG	--	423.8	236.987	106173	10160.4	11534.3	14457	25363.7	25246.4	68926.4	63261.9	62524.3	--	--	--	-	-	-	-
M873T33_NEG	--	33.1855	872.546	22114.2	3374.51	9890.88	5848.77	9534.11	4376.46	8203.9	7036.86	7246	--	--	--	-	-	-	-
M135T120_NEG	--	119.698	135.045	48089.8	108974	169116	399374	242571	395640	301337	310535	292682	--	--	--	-	-	-	-
M69T28_NEG	--	28.337	68.9954	52424.1	2524.93	3476.17	19480.7	30073.4	31294.1	18461.3	19553.8	19073.5	--	--	--	-	-	-	-
M697T24_NEG	--	24.289	697.34	2856.43	15811.7	19513.2	56138.2	71791.4	64693.1	31490.6	31497.6	33336.6	--	--	--	-	-	-	-
M746T139_NEG	--	139.101	745.555	226947	15005.8	32938	144273	141587	128658	46343.6	46344.4	46561.4	--	--	--	-	-	-	-
M415T178_NEG	--	177.649	415.278	22447.6	92649	36874	48737.7	50416.7	50046.2	55226.6	56453.2	55179.5	--	--	--	-	-	-	-
M548T103_NEG	--	103.353	548.239	3140.53	158925	423796	32176.2	19590.4	23853.1	59037.6	66827.5	66841.1	--	--	--	-	-	-	-
M369T32_NEG	--	32.033	369.026	5559.3	3417.36	8771.07	100999	75709.6	52581.8	33303.7	33293.9	35365.1	--	--	--	-	-	-	-
M648T145_NEG	--	145.25	648.46	6737.07	18991.5	24089	90644.5	59153	54749.3	20163.1	20160.6	20799.8	--	--	--	-	-	-	-
M450T151_NEG	--	151.262	450.296	61883.7	32681.3	43966.6	157429	255614	140638	150718	129732	149685	--	--	--	-	-	-	-
M360T34_NEG	--	33.8705	360.22	28481	59156.2	150056	16051.8	12783.5	21675.8	17984.9	18958.9	18425.9	--	--	--	-	-	-	-
M607T428_NEG	--	428.297	607.182	135648	7983.95	31147.1	56970.3	112340	156794	140132	140599	140599	--	--	--	-	-	-	-
M413T30_2_NEG	--	30.16	413.161	2914.86	2664.82	2634.55	7374.62	9672.88	34992	16727	16291.3	23258.8	--	--	--	-	-	-	-
M273T25_2_NEG	--	25.467	273.042	16770.2	8364.08	11437.5	64799.7	92369.1	42715.5	44437.8	42516.3	42522.3	--	--	--	-	-	-	-
M242T129_NEG	--	128.548	242.175	100159	131076	249893	203909	110056	266222	206429	190139	189194	--	--	--	-	-	-	-
M310T40_2_NEG	--	40.149	310.322	3049.5	16092.4	61014.4	1430.76	46273.5	753.935	33237.2	72706.3	73049.1	--	--	--	-	-	-	-
M706T28_NEG	--	28.353	706.44	39728.3	106756	12434.7	39682.1	19392.1	28343.1	37623.5	25876.7	37652.5	--	--	--	-	-	-	-
M160T31_NEG	--	30.9445	160.04	11668.8	11082.6	37755.1	54439.4	54007.7	47925.9	43953.6	41564.5	41569.5	--	--	--	-	-	-	-
M299T338_NEG	--	338.053	299.086	64555.4	1304.06	1239.68	5116.02	4503.45	7372.54	8212.56	7985.77	8218.25	--	--	--	-	-	-	-
M648T412_NEG	--	412.188	648.208	68432.1	7038.87	19717.4	49512.8	107915	111225	93430.1	91597.5	93439.2	--	--	--	-	-	-	-
M413T46_NEG	--	46.3805	413.353	8013.65	62445.6	98420.2	16255.4	17200.9	10489.4	13265.8	13349.6	13309.5	--	--	--	-	-	-	-
M111T160_NEG	--	159.546	111.019	170712	6941.84	23606.7	63297.5	106102	110734	143630	143613	142135	--	--	--	-	-	-	-
M401T27_NEG	--	27.484	401.198	21569.2	48079.3	68670.6	72902.7	69664.4	84871.2	82082.8	82042.8	78657.1	--	--	--	-	-	-	-
M130T328_NEG	--	327.695	130.087	234263	78155.9	116346	44107.9	64017.3	71612.3	149546	149546	148923	--	--	--	-	-	-	-
M750T76_NEG	--	76.11	749.528	615418	87637.2	96553.7	81308.6	73976.2	74491.5	34776.2	34184.6	34783.9	--	--	--	-	-	-	-
M179T33_NEG	--	32.739	179.001	2009.57	18489	9886.43	37749.4	36058.9	24065.9	23924.5	25108.5	25121.6	--	--	--	-	-	-	-
M366T36_2_NEG	--	35.698	366.344	89423	56229.8	46789.4	25195.4	19006.1	20949.4	29955.2	29148.9	29130.3	--	--	--	-	-	-	-
M365T87_NEG	--	86.954	365.071	20034.9	51370.3	68186	488313	140997	117977	223148	179626	223389	--	--	--	-	-	-	-
M477T33_3_NEG	--	33.0765	477.392	15077.1	63009.1	62255.3	7637.32	7377.99	10198.9	38629.4	41707.7	38623.7	--	--	--	-	-	-	-
M1187T164_3_NEG	--	163.909	1187.26	1076.67	81343.4	118955	14793	11102.2	11669.2	26806.4	26712.7	26806.2	--	--	--	-	-	-	-
M719T141_NEG	--	141.13	718.533	73253.9	17233.8	79148	34216.5	42852.8	40613.2	29540.5	22896.8	22911.7	--	--	--	-	-	-	-
M329T81_NEG	--	80.859	329.09	26372.8	108464	128293	328192	204751	297647	147711	160002	147062	--	--	--	-	-	-	-
M503T34_NEG	--	33.683	503.371	13306.8	24621.1	58113.1	38715.3	22912	19414.7	33554.6	34549.1	34487.1	--	--	--	-	-	-	-
M664T34_2_NEG	--	34.033	664.46	15536.1	79719.4	97927.8	35030.3	25279.1	25432.4	26312.9	24567.5	26320.9	--	--	--	-	-	-	-
M780T35_1_NEG	--	34.724	779.519	18647.3	19784.9	32819.3	38266.5	48917.2	51480.2	41002	41055.5	43264.7	--	--	--	-	-	-	-
M426T25_1_NEG	--	24.9605	426.197	56124.2	12910	4497.04	35694.7	81106.4	101616	83090.3	81345.1	81359.3	--	--	--	-	-	-	-
M465T166_2_NEG	--	166.435	465.283	3068.7	38220.7	42483.2	36533.8	207871	43747.5	40657.2	40669.6	39102.6	--	--	--	-	-	-	-
M467T29_NEG	--	28.961	467.208	5911.58	13580.9	10540.6	34524.9	18976.9	6280.03	20382.3	22631.4	12260	--	--	--	-	-	-	-
M567T30_NEG	--	29.624	567.297	34345.7	81427.9	183540	162927	144316	141364	143302	143299	141148	--	--	--	-	-	-	-
M216T334_NEG	--	333.509	216.087	1719.12	6859.95	21340	92648	47958.6	67899.1	39169.5	40698.4	38933.9	--	--	--	-	-	-	-
M326T36_NEG	--	35.703	326.311	23168.3	15604.3	3044.83	9436.95	5907.45	11826.3	6538.77	5272.38	6529.4	--	--	--	-	-	-	-
M313T50_1_NEG	--	50.2115	313.236	13710.4	37373.2	170758	35876.3	33330.6	40899.3	40829.1	41701.4	41713.8	--	--	--	-	-	-	-
M679T83_NEG	--	83.24	679.454	21131	214663	198678	97327.7	67955.3	58371.8	38747.3	36322.5	36335.7	--	--	--	-	-	-	-
M494T159_NEG	--	158.921	494.119	206622	5293.72	11201.3	20565.1	27565.5	34705.7	56954.3	57328.8	57332.3	--	--	--	-	-	-	-
M453T32_NEG	--	31.9385	453.155	9194.95	31211.7	38607.8	23216.1	30963.3	40965.1	19928.9	26711.6	27004.6	--	--	--	-	-	-	-
M448T162_2_NEG	--	161.877	448.175	12393.9	116631	146853	121000	82565.9	101594	76593.8	77914.9	76566.2	--	--	--	-	-	-	-
M460T150_NEG	--	149.956	460.281	47166.8	10305.5	25323.4	52272.3	233525	247114	194530	194799	169922	--	--	--	-	-	-	-
M369T348_NEG	--	347.769	368.975	96109.2	151719	221394	342332	326060	387323	336538	335257	335256	--	--	--	-	-	-	-
M378T119_NEG	--	119.278	378.267	1274.05	166243	40288.9	19308.5	20782.8	16539.4	25760.2	25299.8	25304.7	--	--	--	-	-	-	-
M446T33_NEG	--	33.032	446.329	35472.7	42840.7	51442	28291.5	26538.5	21231	34323.5	34806.9	34324.8	--	--	--	-	-	-	-
M367T26_NEG	--	26.142	367.011	2838.96	7115.63	8524.63	123527	50745.2	28579	23901	22322.4	20904.9	--	--	--	-	-	-	-
M624T51_NEG	--	51.2495	624.241	2715.01	8530.71	20808	234769	46194.9	75382.5	56914.2	51842	56787.6	--	--	--	-	-	-	-
M95T55_NEG	--	55.181	95.0242	7482.77	5990.62	4778.33	2600.78	1763.56	175950	253053	251194	254625	--	--	--	-	-	-	-
M164T249_NEG	--	249.306	164.071	131511	13009.6	20059.6	8132.48	16067.9	23883.9	38153.7	38481.5	35602.2	--	--	--	-	-	-	-
M820T155_NEG	--	154.898	819.55	13389.2	31315.4	14043.7	76194.9	52394.4	65854.9	40901	40899.5	40550.9	--	--	--	-	-	-	-
M230T77_NEG	--	76.647	230.012	61754.5	73649.7	153117	284686	245026	283422	195691	146510	195719	--	--	--	-	-	-	-
M333T33_2_NEG	--	33.2485	333.171	1443.28	2735.1	20424.7	3218.15	14900.1	6885.01	15786.4	10654	10260.8	--	--	--	-	-	-	-
M111T539_NEG	--	538.885	111.008	79424.3	133028	50420.3	48094.6	194669	255802	32244.3	32254.9	26423.1	--	--	--	-	-	-	-
M557T30_2_NEG	--	30.393	557.312	12466.8	43348.3	107849	196306	135365	196867	134597	140292	134405	--	--	--	-	-	-	-
M565T29_3_NEG	--	28.874	565.282	16376.7	59046.2	87747.7	61431.1	63294.3	58155.3	90598	89089	90543.7	--	--	--	-	-	-	-
M705T31_2_NEG	--	31.454	705.4	5577.83	61509.4	8783.67	11421.1	32785.4	4631.99	18502.6	28162.1	28085	--	--	--	-	-	-	-
M261T387_NEG	--	387.49	261.058	50139.7	7420.5	8402.71	28027.9	45407.1	49966.5	59145.6	59171.6	58170.5	--	--	--	-	-	-	-
M501T32_3_NEG	--	32.033	501.391	18591.1	14962.9	49579	61650.8	34878.3	19046	22296.1	22234.4	21480.8	--	--	--	-	-	-	-
M421T63_NEG	--	63.424	421.27	17688.4	42191.4	164432	14761.7	263250	87830	90586.4	108841	108091	--	--	--	-	-	-	-
M364T36_NEG	--	36.0365	364.252	71419.3	60171.7	31861.3	44138	41497.1	22151.9	76042.6	111717	111424	--	--	--	-	-	-	-
M393T32_1_NEG	--	32.366	393.156	7307.84	77497.7	118839	29377.4	32433.2	39415.7	34975.1	36982.9	36454.2	--	--	--	-	-	-	-
M779T136_NEG	--	135.618	778.565	145702	12446.8	30480.1	39302.1	35980	70698.7	48619	48672	52417.7	--	--	--	-	-	-	-
M195T33_2_NEG	--	32.7695	195.138	37686.1	10973.8	25407.9	15680.3	20561.8	65082.3	34249.8	42559.2	42448.2	--	--	--	-	-	-	-
M691T36_1_NEG	--	36.061	690.505	13878.2	46608.7	26911.3	27759.7	17350.5	14663.6	13691.4	14988.8	13693.7	--	--	--	-	-	-	-
M213T116_NEG	--	115.734	213.112	46315.6	87408.2	139504	60946	16823.7	27242	50702.4	55079.5	54882.8	--	--	--	-	-	-	-
M390T149_NEG	--	149.145	390.06	30254.9	56360.9	63331.2	426097	333691	336211	259856	262508	259851	--	--	--	-	-	-	-
M706T72_NEG	--	72.149	705.506	21604.4	116921	181473	69952.7	46176.8	20325.6	14711	16622.2	19516.4	--	--	--	-	-	-	-
M358T27_NEG	--	26.61	358.173	7484.99	26597.7	36797.5	2258.52	5222.75	3989.11	3657.88	4292.6	3633.1	--	--	--	-	-	-	-
M267T258_NEG	--	258.399	267.072	235095	4849.41	26193.1	79547.4	118627	138521	143829	145438	143849	--	--	--	-	-	-	-
M847T136_NEG	--	136.446	846.614	113471	12348.2	40104.8	107072	155243	157888	59408.9	56788	56801.5	--	--	--	-	-	-	-
M199T77_2_NEG	--	77.1	199.133	19874.9	157790	190545	93705.4	25620.2	91424	55508.7	47569	46932.4	--	--	--	-	-	-	-
M409T34_2_NEG	--	33.513	409.403	21522.7	22153.8	28123.5	13638	3537.06	18634.6	9539.43	10025.5	9562.38	--	--	--	-	-	-	-
M393T26_1_NEG	--	25.745	392.991	6008.77	3882.85	7310.55	118986	16447.5	80855.4	36093.4	36362.3	36094	--	--	--	-	-	-	-
M336T33_2_NEG	--	32.623	336.328	9118.45	4535.69	2128.29	1478.62	697.607	2849.37	3056.76	4096.08	2056.02	--	--	--	-	-	-	-
M386T405_NEG	--	405.386	386.031	80161.9	3546.88	3198.59	4248.95	16660.2	17913.3	103177	103173	102372	--	--	--	-	-	-	-
M303T28_NEG	--	28.174	303.089	27790.5	22311.7	104803	117661	74509.4	94921.5	84133.4	84693.2	84132.8	--	--	--	-	-	-	-
M271T38_NEG	--	37.9	271.133	2514.06	22962.7	34594.3	64715.5	59434.6	55571.6	31958.8	31952.6	30004	--	--	--	-	-	-	-
M303T38_1_NEG	--	37.549	303.125	1584.7	55419.4	8473.94	15803.5	18385.1	3776.24	18612.3	13751.6	18522.3	--	--	--	-	-	-	-
M420T33_3_NEG	--	32.8855	420.279	6026.63	60032.4	30026.7	5610.85	7935.55	32889.8	12982	11894.9	11936.3	--	--	--	-	-	-	-
M113T28_NEG	--	28.24	112.985	45565.7	3429.47	5004.01	20588.1	26269	35472.1	22570.3	22610.3	21130.2	--	--	--	-	-	-	-
M153T50_NEG	--	49.9835	153.019	33811.4	34484.4	75988.4	63184.8	108210	104636	112777	107396	90121	--	--	--	-	-	-	-
M287T349_NEG	--	348.942	286.972	115289	203537	275872	396946	363343	424235	390597	390600	387983	--	--	--	-	-	-	-
M584T30_3_NEG	--	29.831	584.433	4261.12	114133	71037.4	16144.4	15795	16187.3	36004.5	38162.7	35647.5	--	--	--	-	-	-	-
M584T32_2_NEG	--	32.032	584.396	8767.38	131730	13792.8	15148.9	28229.8	24917	14174.9	40566.6	40436.6	--	--	--	-	-	-	-
M467T30_NEG	--	29.7435	467.099	4781.06	12957.2	10874	128086	60824.5	112864	67659.2	67683.3	66458.3	--	--	--	-	-	-	-
M345T48_NEG	--	48.387	345.061	11163.5	36808.3	65148.4	65789.5	49555.9	64301.4	38278.9	35638.8	35701.6	--	--	--	-	-	-	-
M604T22_NEG	--	22.0505	604.341	3967.02	48912.7	28363.5	19822.5	11996.3	11996.9	19087.5	19690.9	19710	--	--	--	-	-	-	-
M283T297_NEG	--	296.901	283.154	57781.4	6209.26	5555.14	6863.67	5285.64	8099.33	4363.14	4570.95	4344.29	--	--	--	-	-	-	-
M254T46_2_NEG	--	45.956	254.438	62867.4	132817	86101.9	48439.4	47515.4	46492.3	73509.1	78344	78372.2	--	--	--	-	-	-	-
M375T116_NEG	--	116.004	375.252	24975	21899	56351.3	45122	28964.8	45216.7	36109.8	34798.6	33419.8	--	--	--	-	-	-	-
M178T173_NEG	--	173.414	178.017	82345.2	5188.35	8722.22	3854.04	7909.94	7792.69	28747.7	28749.7	29359.1	--	--	--	-	-	-	-
M358T33_2_NEG	--	33.454	358.282	42822.6	5622.81	7370.08	12583.2	12008.2	7952.58	14552.7	15374.9	15384.2	--	--	--	-	-	-	-
M514T30_NEG	--	29.66	514.151	4175.52	11632.4	26954.6	60986.2	54503.3	53910.2	32435.2	34041.7	34027.3	--	--	--	-	-	-	-
M595T33_2_NEG	--	33.19	595.4	31903.6	9093.46	29880.3	49132.6	51821.9	21371.6	26809.4	26827.9	24961.8	--	--	--	-	-	-	-
M624T29_NEG	--	29.3365	624.463	8214.67	54207.5	50848.1	13918.8	16673.3	11285.8	29354.7	27464.4	29230.5	--	--	--	-	-	-	-
M193T32_NEG	--	32.1415	192.98	806.714	2898.15	721.596	678.974	1236.49	1374.54	3910.53	3923.61	6276.62	--	--	--	-	-	-	-
M706T136_NEG	--	136.346	706.479	35226.8	74403.2	98211.7	6277.91	7081.23	11892	12226.5	12227.6	11985.4	--	--	--	-	-	-	-
M707T133_NEG	--	133.363	706.534	29830.2	80411.8	96520.1	17055.8	8551.45	4351.09	7767.89	6905.69	6961.45	--	--	--	-	-	-	-
M316T31_1_NEG	--	31.1705	315.628	4284.49	72368.4	92541.5	27885.3	46712.7	17037.3	36643.8	33313.7	33275.4	--	--	--	-	-	-	-
M1087T38_2_NEG	--	37.693	1086.81	35527.8	241.436	4356.63	3217.96	9135.73	5179.06	17147.4	16458.4	16957.8	--	--	--	-	-	-	-
M465T142_NEG	--	141.722	465.259	5509.35	26538.9	44549.4	49203.1	18328.9	23407.1	21953.4	18820.8	21976.2	--	--	--	-	-	-	-
M221T76_NEG	--	76.111	221.081	14299.3	14599.7	35724.1	23449.4	24159.2	17465.6	117483	116650	67859.7	--	--	--	-	-	-	-
M453T80_NEG	--	80.216	453.298	5469.38	298706	253408	15608.3	20716.2	17129.6	45566.5	45517.8	48203.7	--	--	--	-	-	-	-
M616T293_NEG	--	292.613	616.328	46927.5	1196.29	9489.49	25017.8	28457.2	58465.2	20716.9	20712.7	21328.8	--	--	--	-	-	-	-
M404T32_5_NEG	--	31.522	404.324	13857.8	25866.4	12709.5	48777.8	37101.1	24974.6	29710.1	31323.5	28620.8	--	--	--	-	-	-	-
M555T36_NEG	--	36.09	554.512	7622.82	41695.6	34568.7	18952.3	13604.1	6713.84	11186.2	11099.4	10812.4	--	--	--	-	-	-	-
M593T35_2_NEG	--	34.544	593.49	15202	32757.3	71815.5	24844.7	21374.8	12677.1	32597.8	32111.6	31462.5	--	--	--	-	-	-	-
M209T30_2_NEG	--	30.452	209.011	28003.3	8289.36	37454.2	73701.8	54814.1	40413.3	70051.7	69688.8	62390.4	--	--	--	-	-	-	-
M554T164_NEG	--	163.913	554.3	114383	34034.1	213071	97140.2	173863	144118	292074	292127	298370	--	--	--	-	-	-	-
M192T529_NEG	--	529.199	192.023	123113	85613.4	154832	91007.7	20922.6	92234.9	37375.1	31141.1	37527.9	--	--	--	-	-	-	-
M459T27_NEG	--	27.4645	459.24	25491.7	6331.63	32812	55054.1	56134.2	55081.8	59060.8	58934.8	55962.3	--	--	--	-	-	-	-
M189T361_NEG	--	361.189	188.939	424239	631115	640882	729005	647263	255987	370944	504841	498716	--	--	--	-	-	-	-
M243T77_NEG	--	76.809	243.195	38679.1	354827	141075	62760.8	102583	60884.3	87378.6	86315.6	87376	--	--	--	-	-	-	-
M544T34_NEG	--	33.5275	544.446	8040.84	28408.9	20507.6	3830.96	5973.58	5080.73	4333.44	4333.52	4173.05	--	--	--	-	-	-	-
M329T153_NEG	--	152.784	329.232	103460	108554	114716	554515	207616	547130	400507	395994	395980	--	--	--	-	-	-	-
M217T235_NEG	--	234.865	217.002	52779	70645	102956	118160	109811	185712	214555	298531	225756	--	--	--	-	-	-	-
M410T27_2_NEG	--	26.9925	410.201	26628	14053.8	7217.89	15248.9	16636.2	26672.2	32441.1	32441.3	32959.9	--	--	--	-	-	-	-
M658T181_NEG	--	180.738	658.392	64576.8	4299.9	12460.2	7364.71	13986.6	12453	29076	28675.9	29073.5	--	--	--	-	-	-	-
M630T185_NEG	--	184.581	630.361	55171.7	4939.29	14905.5	8608.99	8207.6	12731.7	31574.7	31345.2	31574.3	--	--	--	-	-	-	-
M691T384_NEG	--	384.32	691.21	456.494	533.477	6531.95	101414	126877	68806.2	36772	36796.6	35454.6	--	--	--	-	-	-	-
M227T129_NEG	--	129.038	227.07	94902	203708	217612	287196	268765	111608	134541	130880	130883	--	--	--	-	-	-	-
M128T22_NEG	--	22.154	127.924	4598.53	473.558	433.817	9205.04	2741.82	5344.3	549.624	636.219	544.681	--	--	--	-	-	-	-
M182T25_NEG	--	24.886	182.021	3160.68	2723.01	5018.91	45723	41585.7	15750.8	11421.3	12197.8	12744.8	--	--	--	-	-	-	-
M197T137_NEG	--	137.126	197.031	91197.3	89437.2	196367	48468.8	244508	167370	110339	96367.6	109992	--	--	--	-	-	-	-
M543T28_2_NEG	--	28.1345	543.334	28358.3	34581.3	71912.7	145495	62909	89227.9	107809	107540	112475	--	--	--	-	-	-	-
M779T35_2_NEG	--	34.544	778.513	51257.2	42049.7	44790	56133.4	47770.1	47086.3	37599.5	38915.2	38915.6	--	--	--	-	-	-	-
M779T35_1_NEG	--	34.928	778.507	49576.1	43386.3	45238.4	65242.7	57542.2	53474	38782.6	37304.9	37376.3	--	--	--	-	-	-	-
M775T73_NEG	--	73.197	774.536	180391	185601	96541.3	77850.8	60651.2	58658.8	35141.7	34782.5	35142.8	--	--	--	-	-	-	-
M309T33_3_NEG	--	32.812	309.136	34886.7	113016	168290	53530.1	47363.6	62405.3	86941.3	86929.1	85919.9	--	--	--	-	-	-	-
M309T33_2_NEG	--	32.933	309.1	7490.9	7300.76	151452	41445.5	41628.1	37329.8	28784.1	28732.9	21365	--	--	--	-	-	-	-
M111T573_NEG	--	573.264	111.008	397147	159002	351304	390024	279426	388479	112889	115031	112893	--	--	--	-	-	-	-
M559T25_NEG	--	25.3815	559.401	7792.7	36704.8	19864.7	56795.1	50410.2	42587.8	23310	23391.5	23813.6	--	--	--	-	-	-	-
M567T161_NEG	--	160.922	567.35	8952.83	134554	32810	42315.9	27185.5	21516.6	31640.4	31623.7	29897.4	--	--	--	-	-	-	-
[truncated: 16,515 more rows]
